# Supplementary material for: eDNA as a tool for non-invasive monitoring of the fauna of a turbid, well-mixed system, the Elbe estuary in Germany
Source: PLoS One. 2021 Apr 16;16(4):e0250452. doi: 10.1371/journal.pone.0250452 (PMC8051793; doi:10.1371/journal.pone.0250452)
Supplement: S3 Table — Statistics for each OTU (= BIN) from each replicate provided as reported by mBRAVE. (XLSX) [file pone.0250452.s004.xlsx]

## Sheet: Tabelle1
station	replicate	tide	readCount	bin_uri	sequences	dereplicates	preclusters	abundance_rank	pc_reduce_derep	dataSize	id_overlap_mean	mean_gc_percent	mean_length	pc_sim_mean	dsCode	phylum	class	order	family	subfamily	genus	species
A	1	mid	150656	BOLD:ADL9757	3	2	2	1	33.3333	6465085	16	63.7512	106.667	100	SYS-CRLINSECTA	Arthropoda	Insecta	Diptera	Tephritidae	Dacinae	Dacus	Dacus formosanus
A	1	mid	150656	BOLD:ACH6274	85	25	25	8	70.5882	6465085	192.694	34.4939	202.565	98.7806	SYS-CRLNONARTHINVERT	Rotifera	Monogononta	Ploima	Synchaetidae		Polyarthra	Polyarthra dolichoptera
A	1	mid	150656	BOLD:ACF5867	153	26	26	7	83.0065	6465085	203.549	35.512	203.621	99.6884	SYS-CRLNONARTHINVERT	Mollusca	Bivalvia	Venerida	Cyrenidae		Corbicula	Corbicula sp. LB22, Corbicula North American form B, Corbicula sp. 33IL3, Corbicula sp. 34IL4, Corbicula North American form C, Corbicula sp. LB81, Corbicula sp. PKa-2002, Corbicula sp. 56Rho1, Corbicula sp. 57Rho2, Corbicula sp. 32IL2, Corbicula sp. 31IL1, Corbicula sp., Corbicula sp. LB59, Corbicula leana, Corbicula sp. LB1, Corbicula sp. LB5, Corbicula sp. LB6, Corbicula africana, Corbicula fl…
A	1	mid	150656	BOLD:ADX1250	189	22	22	6	88.3598	6465085	181.677	40.5787	204.069	99.4038	SYS-CRLNONARTHINVERT	Rotifera	Monogononta	Ploima	Synchaetidae		Polyarthra	Polyarthra vulgaris
A	1	mid	150656	BOLD:ACH9570	463	84	84	4	81.8575	6465085	201.397	39.8224	201.413	99.4436	SYS-CRLNONARTHINVERT	Rotifera	Monogononta	Ploima	Brachionidae		Keratella	Keratella cochlearis
A	1	mid	150656	BOLD:ACL2016	464	54	54	3	88.3621	6465085	203.634	36.4109	203.634	98.4708	SYS-CRLNONARTHINVERT	Rotifera	Monogononta	Ploima	Brachionidae		Keratella	Keratella cochlearis
A	1	mid	150656	BOLD:AAR9097	805	95	95	2	88.1988	6465085	190.822	32.8864	203.563	99.9599	SYS-CRLNONARTHINVERT	Cnidaria	Hydrozoa	Anthoathecata	Oceaniidae		Cordylophora	Cordylophora sp. WH1, Cordylophora sp. IM1, Cordylophora sp. JC1
A	1	mid	150656	BOLD:ACH9569	829	106	106	1	87.2135	6465085	202.012	37.661	203.002	98.2346	SYS-CRLNONARTHINVERT	Rotifera	Monogononta	Ploima	Brachionidae		Keratella	Keratella cochlearis
A	2	mid	100534	BOLD:ACC0035	4	3	3	7	25	4535762	168	34.1578	202	98.9624	SYS-CRLNONARTHINVERT	Rotifera	Monogononta	Ploima	Synchaetidae		Polyarthra	Polyarthra dolichoptera
A	2	mid	100534	BOLD:ACH6274	4	2	2	7	50	4535762	204.5	32.5179	204.5	99.022	SYS-CRLNONARTHINVERT	Rotifera	Monogononta	Ploima	Synchaetidae		Polyarthra	Polyarthra dolichoptera
A	2	mid	100534	BOLD:AAI6294	6	4	4	6	33.3333	4535762	204.167	35.8373	204.167	97.6338	SYS-CRLNONARTHINVERT	Annelida	Clitellata	Haplotaxida	Naididae	Naidinae	Paranais	Paranais frici
A	2	mid	100534	BOLD:ACL2016	53	14	14	5	73.5849	4535762	204.132	36.4524	204.132	98.4375	SYS-CRLNONARTHINVERT	Rotifera	Monogononta	Ploima	Brachionidae		Keratella	Keratella cochlearis
A	2	mid	100534	BOLD:ACH9570	57	19	19	4	66.6667	4535762	200.877	39.5649	200.965	99.48	SYS-CRLNONARTHINVERT	Rotifera	Monogononta	Ploima	Brachionidae		Keratella	Keratella cochlearis
A	2	mid	100534	BOLD:ADF1214	67	11	11	1	83.5821	4535762	201.224	31.033	201.224	99.7332	SYS-CRLINSECTA	Arthropoda	Insecta	Diptera	Chironomidae	Chironominae	Benthalia	Benthalia dissidens, Benthalia carbonaria
A	2	mid	100534	BOLD:ADM1474	420	31	31	2	92.619	4535762	201.021	38.87	201.017	97.0797	SYS-CRLNONARTHINVERT	Rotifera	Monogononta	Ploima	Synchaetidae		Polyarthra	Polyarthra sp. WM-2017e
A	2	mid	100534	BOLD:AAR9097	489	67	67	1	86.2986	4535762	190.955	33.0237	203.434	99.9382	SYS-CRLNONARTHINVERT	Cnidaria	Hydrozoa	Anthoathecata	Oceaniidae		Cordylophora	Cordylophora sp. WH1, Cordylophora sp. IM1, Cordylophora sp. JC1
A	3	mid	207972	BOLD:ADL9757	4	3	3	2	25	8997307	16	60.4463	117.5	100	SYS-CRLINSECTA	Arthropoda	Insecta	Diptera	Tephritidae	Dacinae	Dacus	Dacus formosanus
A	3	mid	207972	BOLD:AEC0082	6	3	3	1	50	8997307	203	37.1927	203	99.0147	SYS-CRLINSECTA	Arthropoda	Insecta	Diptera
A	3	mid	207972	BOLD:AAI6294	9	6	6	13	33.3333	8997307	204.444	35.9239	204.444	97.6096	SYS-CRLNONARTHINVERT	Annelida	Clitellata	Haplotaxida	Naididae	Naidinae	Paranais	Paranais frici
A	3	mid	207972	BOLD:ACQ7481	14	4	4	12	71.4286	8997307	204.357	36.7008	204.357	97.5533	SYS-CRLNONARTHINVERT	Annelida	Clitellata	Haplotaxida	Naididae	Tubificinae	Potamothrix	Potamothrix hammoniensis
A	3	mid	207972	BOLD:ADJ7954	15	5	5	11	66.6667	8997307	204.533	35.4951	204.533	97.49	SYS-CRLNONARTHINVERT	Annelida	Clitellata	Haplotaxida	Naididae
A	3	mid	207972	BOLD:AAC8490	32	14	14	2	56.25	8997307	195.531	50.5779	195.531	99.9695	SYS-CRLCHORDATA	Chordata	Actinopterygii	Osmeriformes	Osmeridae		Osmerus	Osmerus eperlanus
A	3	mid	207972	BOLD:ADM1568	36	6	6	9	83.3333	8997307	204.583	31.1195	204.583	99.9593	SYS-CRLNONARTHINVERT	Rotifera	Monogononta	Ploima	Brachionidae		Brachionus	Brachionus calyciflorus
A	3	mid	207972	BOLD:AAZ5138	41	14	14	8	65.8537	8997307	201.244	40.4633	201.244	98.7165	SYS-CRLNONARTHINVERT	Rotifera	Monogononta	Ploima	Brachionidae		Keratella	Keratella sp. WM-2017a, Keratella tecta, Keratella cochlearis
A	3	mid	207972	BOLD:ACB0425	99	12	12	1	87.8788	8997307	202.313	38.7736	202.313	99.7428	SYS-CRLNONINSECTARTH	Arthropoda	Branchiopoda	Anomopoda	Chydoridae	Chydorinae	Chydorus	Chydorus sphaericus
A	3	mid	207972	BOLD:ABA0395	160	10	10	6	93.75	8997307	203.581	35.0367	204.444	97.0741	SYS-CRLNONARTHINVERT	Rotifera	Monogononta	Ploima	Brachionidae		Keratella	Keratella cochlearis
A	3	mid	207972	BOLD:ACH9569	218	41	41	5	81.1927	8997307	201.78	37.4493	202.766	97.9523	SYS-CRLNONARTHINVERT	Rotifera	Monogononta	Ploima	Brachionidae		Keratella	Keratella cochlearis
A	3	mid	207972	BOLD:AAR9097	684	80	80	4	88.3041	8997307	190.607	32.8994	203.371	99.9555	SYS-CRLNONARTHINVERT	Cnidaria	Hydrozoa	Anthoathecata	Oceaniidae		Cordylophora	Cordylophora sp. WH1, Cordylophora sp. IM1, Cordylophora sp. JC1
A	3	mid	207972	BOLD:AAC2296	1296	179	179	3	86.1883	8997307	202.812	34.8237	202.812	99.8965	SYS-CRLNONARTHINVERT	Mollusca	Bivalvia	Venerida	Cyrenidae		Corbicula	Corbicula sp. 21De7, Corbicula sp. 54WC3, Corbicula sp. 02A15, Corbicula sp. 24Le3, Corbicula sp. 37Virg2, Corbicula North American form A, Corbicula sp. Taiwan, Corbicula sp. 29HK2, Corbicula sp. 20De6, Corbicula sp. DTH10, Corbicula sp. 19560_34, Corbicula leana, Corbicula sp. 55WC5, Corbicula sp. 12B19, Corbicula sp. 14B4, Corbicula sp. 36Virg1, Corbicula sp. 27Wi9, Corbicula sp. 58Sao1, Corbi…
A	3	mid	207972	BOLD:ACH9570	1799	213	213	2	88.1601	8997307	201.513	39.8311	201.523	99.4561	SYS-CRLNONARTHINVERT	Rotifera	Monogononta	Ploima	Brachionidae		Keratella	Keratella cochlearis
A	3	mid	207972	BOLD:ACL2016	1856	149	149	1	91.972	8997307	204.287	36.4432	204.287	98.4882	SYS-CRLNONARTHINVERT	Rotifera	Monogononta	Ploima	Brachionidae		Keratella	Keratella cochlearis
B	1	low	334254	BOLD:AAE2233	3	3	3	25	0	13898742	133	32.9257	133.333	97.2344	SYS-CRLNONARTHINVERT	Rotifera	Monogononta	Ploima	Brachionidae		Keratella	Keratella cochlearis
B	1	low	334254	BOLD:AAF4424	4	4	4	24	0	13898742	179.5	31.8723	179.5	99.5157	SYS-CRLNONARTHINVERT	Rotifera	Monogononta	Ploima	Synchaetidae		Synchaeta	Synchaeta cf. tremula/oblonga, Synchaeta sp. AMD-2002, Synchaeta sp. WM-2017c, Synchaeta oblonga
B	1	low	334254	BOLD:AAI8740	8	4	4	23	50	13898742	203.25	31.3048	203.25	99.2638	SYS-CRLNONARTHINVERT	Cnidaria	Hydrozoa	Anthoathecata	Hydridae		Hydra	Hydra sp., Hydra oligactis
B	1	low	334254	BOLD:ACH6274	11	7	7	22	36.3636	13898742	186.182	35.0588	197.091	98.7104	SYS-CRLNONARTHINVERT	Rotifera	Monogononta	Ploima	Synchaetidae		Polyarthra	Polyarthra dolichoptera
B	1	low	334254	BOLD:ACC0012	18	9	9	21	50	13898742	204.111	26.9723	204.111	99.7821	SYS-CRLNONARTHINVERT	Rotifera	Monogononta	Ploima	Synchaetidae		Synchaeta	Synchaeta kitina
B	1	low	334254	BOLD:ADX1250	21	11	11	20	47.619	13898742	182.667	40.5528	202.381	99.7165	SYS-CRLNONARTHINVERT	Rotifera	Monogononta	Ploima	Synchaetidae		Polyarthra	Polyarthra vulgaris
B	1	low	334254	BOLD:AAP0990	22	3	3	19	86.3636	13898742	204.818	32.957	204.818	98.2909	SYS-CRLNONARTHINVERT	Rotifera	Monogononta	Ploima	Brachionidae		Brachionus	Brachionus quadridentatus f. brevispinus
B	1	low	334254	BOLD:AAR9097	67	21	21	17	68.6567	13898742	190.224	33.3829	203.03	99.852	SYS-CRLNONARTHINVERT	Cnidaria	Hydrozoa	Anthoathecata	Oceaniidae		Cordylophora	Cordylophora sp. WH1, Cordylophora sp. IM1, Cordylophora sp. JC1
B	1	low	334254	BOLD:ABA7390	74	16	16	16	78.3784	13898742	203.932	38.3636	203.932	99.456	SYS-CRLNONARTHINVERT	Rotifera	Monogononta	Ploima	Brachionidae		Brachionus	Brachionus quadridentatus
B	1	low	334254	BOLD:AAC2296	145	44	44	15	69.6552	13898742	202.359	34.8377	202.359	99.8348	SYS-CRLNONARTHINVERT	Mollusca	Bivalvia	Venerida	Cyrenidae		Corbicula	Corbicula sp. 21De7, Corbicula sp. 54WC3, Corbicula sp. 02A15, Corbicula sp. 24Le3, Corbicula sp. 37Virg2, Corbicula North American form A, Corbicula sp. Taiwan, Corbicula sp. 29HK2, Corbicula sp. 20De6, Corbicula sp. DTH10, Corbicula sp. 19560_34, Corbicula leana, Corbicula sp. 55WC5, Corbicula sp. 12B19, Corbicula sp. 14B4, Corbicula sp. 36Virg1, Corbicula sp. 27Wi9, Corbicula sp. 58Sao1, Corbi…
B	1	low	334254	BOLD:ACS3733	147	48	48	14	67.3469	13898742	173.878	33.4008	203.32	99.4219	SYS-CRLNONARTHINVERT	Rotifera	Monogononta	Ploima	Brachionidae		Brachionus	Brachionus angularis
B	1	low	334254	BOLD:ADM0810	238	52	52	13	78.1513	13898742	180.992	36.4681	180.992	98.5636	SYS-CRLNONARTHINVERT	Rotifera	Monogononta	Ploima	Trichocercidae		Trichocerca	Trichocerca sp. WM-2017e
B	1	low	334254	BOLD:ADL9176	280	54	54	12	80.7143	13898742	202.882	31.5079	202.882	99.6949	SYS-CRLNONARTHINVERT	Rotifera	Monogononta	Ploima	Trichocercidae		Trichocerca	Trichocerca sp. WM-2017b
B	1	low	334254	BOLD:ABA0395	365	19	19	11	94.7945	13898742	202.63	35.129	204.521	97.0994	SYS-CRLNONARTHINVERT	Rotifera	Monogononta	Ploima	Brachionidae		Keratella	Keratella cochlearis
B	1	low	334254	BOLD:AAD8427	438	70	70	10	84.0183	13898742	203.011	31.9822	204.005	99.7782	SYS-CRLNONARTHINVERT	Rotifera	Monogononta	Ploima	Brachionidae		Brachionus	Brachionus calyciflorus
B	1	low	334254	BOLD:ADM1568	469	53	53	9	88.6994	13898742	203.343	31.2669	203.94	99.8495	SYS-CRLNONARTHINVERT	Rotifera	Monogononta	Ploima	Brachionidae		Brachionus	Brachionus calyciflorus
B	1	low	334254	BOLD:ADW8541	500	71	71	8	85.8	13898742	193.562	35.696	203.384	98.4839	SYS-CRLNONARTHINVERT	Rotifera	Monogononta	Ploima	Synchaetidae		Polyarthra	Polyarthra sp. EM-2017
B	1	low	334254	BOLD:AAZ5138	895	190	190	7	78.7709	13898742	201.66	41.1262	201.659	98.49	SYS-CRLNONARTHINVERT	Rotifera	Monogononta	Ploima	Brachionidae		Keratella	Keratella sp. WM-2017a, Keratella tecta, Keratella cochlearis
B	1	low	334254	BOLD:ADX0390	901	97	97	6	89.2342	13898742	202.866	37.2184	202.866	97.7691	SYS-CRLNONARTHINVERT	Rotifera	Monogononta	Ploima	Brachionidae		Anuraeopsis	Anuraeopsis sp. WM-2017a
B	1	low	334254	BOLD:ACL2016	1979	136	136	5	93.1278	13898742	204.071	36.4094	204.071	98.4996	SYS-CRLNONARTHINVERT	Rotifera	Monogononta	Ploima	Brachionidae		Keratella	Keratella cochlearis
B	1	low	334254	BOLD:ACH9570	1986	263	263	4	86.7573	13898742	201.284	39.748	201.32	99.4543	SYS-CRLNONARTHINVERT	Rotifera	Monogononta	Ploima	Brachionidae		Keratella	Keratella cochlearis
B	1	low	334254	BOLD:ADM1474	4722	116	116	3	97.5434	13898742	200.858	38.8798	200.866	97.0793	SYS-CRLNONARTHINVERT	Rotifera	Monogononta	Ploima	Synchaetidae		Polyarthra	Polyarthra sp. WM-2017e
B	1	low	334254	BOLD:ACH9569	4766	517	517	2	89.1523	13898742	201.665	37.5699	202.651	97.8761	SYS-CRLNONARTHINVERT	Rotifera	Monogononta	Ploima	Brachionidae		Keratella	Keratella cochlearis
B	1	low	334254	BOLD:ADM0809	27586	305	305	1	98.8944	13898742	204.286	37.3525	204.288	97.1047	SYS-CRLNONARTHINVERT	Rotifera	Monogononta	Ploima	Trichocercidae		Trichocerca	Trichocerca sp. WM-2017e
B	2	low	278876	BOLD:AAI6295	3	2	2	24	33.3333	11164553	204.333	37.0301	204.333	100	SYS-CRLNONARTHINVERT	Annelida	Clitellata	Haplotaxida	Naididae	Naidinae	Paranais	Paranais frici
B	2	low	278876	BOLD:AAF4424	6	3	3	21	50	11164553	204.667	31.6797	204.667	99.7561	SYS-CRLNONARTHINVERT	Rotifera	Monogononta	Ploima	Synchaetidae		Synchaeta	Synchaeta cf. tremula/oblonga, Synchaeta sp. AMD-2002, Synchaeta sp. WM-2017c, Synchaeta oblonga
B	2	low	278876	BOLD:ADX1250	6	3	3	21	50	11164553	181.667	41.0461	204.667	100	SYS-CRLNONARTHINVERT	Rotifera	Monogononta	Ploima	Synchaetidae		Polyarthra	Polyarthra vulgaris
B	2	low	278876	BOLD:ADV9591	8	5	5	19	37.5	11164553	204	38.915	204	99.0178	SYS-CRLNONARTHINVERT	Rotifera	Monogononta	Ploima	Synchaetidae		Polyarthra	Polyarthra sp. WM-2017c
B	2	low	278876	BOLD:ADC8854	10	5	5	2	50	11164553	202.8	45.5668	202.8	98.7658	SYS-CRLCHORDATA	Chordata	Actinopterygii	Anguilliformes	Anguillidae		Anguilla	Anguilla anguilla, Anguilla rostrata
B	2	low	278876	BOLD:ACC0012	10	3	3	18	70	11164553	204.7	26.7694	204.7	100	SYS-CRLNONARTHINVERT	Rotifera	Monogononta	Ploima	Synchaetidae		Synchaeta	Synchaeta kitina
B	2	low	278876	BOLD:AAD1749	41	14	14	1	65.8537	11164553	197.049	43.6002	197.049	99.9386	SYS-CRLCHORDATA	Chordata	Actinopterygii	Perciformes	Percidae	Luciopercinae	Sander, Stizostedion	Sander lucioperca, Sander canadensis, Stizostedion lucioperca
B	2	low	278876	BOLD:ADW8541	43	20	20	17	53.4884	11164553	192.488	35.5204	202.744	98.4541	SYS-CRLNONARTHINVERT	Rotifera	Monogononta	Ploima	Synchaetidae		Polyarthra	Polyarthra sp. EM-2017
B	2	low	278876	BOLD:ADL9176	44	16	16	16	63.6364	11164553	204.023	32.259	204.023	98.985	SYS-CRLNONARTHINVERT	Rotifera	Monogononta	Ploima	Trichocercidae		Trichocerca	Trichocerca sp. WM-2017b
B	2	low	278876	BOLD:AAD8427	81	16	16	15	80.2469	11164553	203.346	31.8666	204.346	99.9272	SYS-CRLNONARTHINVERT	Rotifera	Monogononta	Ploima	Brachionidae		Brachionus	Brachionus calyciflorus
B	2	low	278876	BOLD:ADM0810	82	31	31	14	62.1951	11164553	166.622	36.8024	166.622	98.3223	SYS-CRLNONARTHINVERT	Rotifera	Monogononta	Ploima	Trichocercidae		Trichocerca	Trichocerca sp. WM-2017e
B	2	low	278876	BOLD:ACF5867	91	24	24	13	73.6264	11164553	203.484	35.5252	203.484	99.687	SYS-CRLNONARTHINVERT	Mollusca	Bivalvia	Venerida	Cyrenidae		Corbicula	Corbicula sp. LB22, Corbicula North American form B, Corbicula sp. 33IL3, Corbicula sp. 34IL4, Corbicula North American form C, Corbicula sp. LB81, Corbicula sp. PKa-2002, Corbicula sp. 56Rho1, Corbicula sp. 57Rho2, Corbicula sp. 32IL2, Corbicula sp. 31IL1, Corbicula sp., Corbicula sp. LB59, Corbicula leana, Corbicula sp. LB1, Corbicula sp. LB5, Corbicula sp. LB6, Corbicula africana, Corbicula fl…
B	2	low	278876	BOLD:ADM1568	92	11	11	12	88.0435	11164553	204.815	31.258	204.815	99.8674	SYS-CRLNONARTHINVERT	Rotifera	Monogononta	Ploima	Brachionidae		Brachionus	Brachionus calyciflorus
B	2	low	278876	BOLD:ABA0395	93	10	10	11	89.2473	11164553	204.409	34.9384	204.409	97.0646	SYS-CRLNONARTHINVERT	Rotifera	Monogononta	Ploima	Brachionidae		Keratella	Keratella cochlearis
B	2	low	278876	BOLD:AAC2296	135	24	24	10	82.2222	11164553	203.704	34.7964	203.704	99.9346	SYS-CRLNONARTHINVERT	Mollusca	Bivalvia	Venerida	Cyrenidae		Corbicula	Corbicula sp. 21De7, Corbicula sp. 54WC3, Corbicula sp. 02A15, Corbicula sp. 24Le3, Corbicula sp. 37Virg2, Corbicula North American form A, Corbicula sp. Taiwan, Corbicula sp. 29HK2, Corbicula sp. 20De6, Corbicula sp. DTH10, Corbicula sp. 19560_34, Corbicula leana, Corbicula sp. 55WC5, Corbicula sp. 12B19, Corbicula sp. 14B4, Corbicula sp. 36Virg1, Corbicula sp. 27Wi9, Corbicula sp. 58Sao1, Corbi…
B	2	low	278876	BOLD:ABA7390	165	34	34	9	79.3939	11164553	203.2	38.2645	203.2	99.434	SYS-CRLNONARTHINVERT	Rotifera	Monogononta	Ploima	Brachionidae		Brachionus	Brachionus quadridentatus
B	2	low	278876	BOLD:ACS3733	283	69	69	8	75.6184	11164553	172.276	33.2264	202.64	98.9166	SYS-CRLNONARTHINVERT	Rotifera	Monogononta	Ploima	Brachionidae		Brachionus	Brachionus angularis
B	2	low	278876	BOLD:ACH9570	306	53	53	7	82.6797	11164553	202.157	39.772	202.18	99.4554	SYS-CRLNONARTHINVERT	Rotifera	Monogononta	Ploima	Brachionidae		Keratella	Keratella cochlearis
B	2	low	278876	BOLD:ACL2016	311	34	34	6	89.0675	11164553	204.395	36.4504	204.395	98.4942	SYS-CRLNONARTHINVERT	Rotifera	Monogononta	Ploima	Brachionidae		Keratella	Keratella cochlearis
B	2	low	278876	BOLD:AAZ5138	401	94	94	5	76.5586	11164553	201.736	41.2861	201.736	98.6049	SYS-CRLNONARTHINVERT	Rotifera	Monogononta	Ploima	Brachionidae		Keratella	Keratella sp. WM-2017a, Keratella tecta, Keratella cochlearis
B	2	low	278876	BOLD:ADX0390	496	70	70	4	85.8871	11164553	202.736	37.1205	202.736	97.5682	SYS-CRLNONARTHINVERT	Rotifera	Monogononta	Ploima	Brachionidae		Anuraeopsis	Anuraeopsis sp. WM-2017a
B	2	low	278876	BOLD:ADM1474	1569	56	56	3	96.4308	11164553	202.167	38.8233	202.167	97.0718	SYS-CRLNONARTHINVERT	Rotifera	Monogononta	Ploima	Synchaetidae		Polyarthra	Polyarthra sp. WM-2017e
B	2	low	278876	BOLD:ACH9569	3064	351	351	2	88.5444	11164553	201.988	37.3564	202.977	97.7159	SYS-CRLNONARTHINVERT	Rotifera	Monogononta	Ploima	Brachionidae		Keratella	Keratella cochlearis
B	2	low	278876	BOLD:ADM0809	18177	150	150	1	99.1748	11164553	204.35	37.3862	204.35	97.077	SYS-CRLNONARTHINVERT	Rotifera	Monogononta	Ploima	Trichocercidae		Trichocerca	Trichocerca sp. WM-2017e
B	3	low	261056	BOLD:ABV3907	4	4	4	3	0	10573489	204	32.1072	204	100	SYS-CRLINSECTA	Arthropoda	Insecta	Diptera	Limoniidae	Limoniinae	Dicranomyia	TAsp 9, Dicranomyia didyma, TAsp 11, Dicranomyia cf. didyma, Dicranomyia fuscinota, TAsp 13c, Limonia didyma
B	3	low	261056	BOLD:ADL9757	5	1	1	2	80	10573489	16	40.458	131	100	SYS-CRLINSECTA	Arthropoda	Insecta	Diptera	Tephritidae	Dacinae	Dacus	Dacus formosanus
B	3	low	261056	BOLD:ADM0810	6	4	4	17	33.3333	10573489	178.833	36.0238	178.833	98.5591	SYS-CRLNONARTHINVERT	Rotifera	Monogononta	Ploima	Trichocercidae		Trichocerca	Trichocerca sp. WM-2017e
B	3	low	261056	BOLD:ABA7390	23	10	10	15	56.5217	10573489	204.217	38.2451	204.217	99.4467	SYS-CRLNONARTHINVERT	Rotifera	Monogononta	Ploima	Brachionidae		Brachionus	Brachionus quadridentatus
B	3	low	261056	BOLD:AAI6295	25	8	8	14	68	10573489	201.8	37.13	201.8	99.961	SYS-CRLNONARTHINVERT	Annelida	Clitellata	Haplotaxida	Naididae	Naidinae	Paranais	Paranais frici
B	3	low	261056	BOLD:AAR9094	28	8	8	13	71.4286	10573489	203.286	31.199	203.286	99.4173	SYS-CRLNONARTHINVERT	Cnidaria	Hydrozoa	Anthoathecata	Oceaniidae		Cordylophora	Cordylophora caspia, Cordylophora sp. NFR10, Cordylophora sp. NFR6, Cordylophora sp. NFR7, Cordylophora sp. NFR4, Cordylophora sp. NFR2, Cordylophora sp. NFR1
B	3	low	261056	BOLD:ADM1568	38	8	8	12	78.9474	10573489	202.947	31.5477	204.789	99.659	SYS-CRLNONARTHINVERT	Rotifera	Monogononta	Ploima	Brachionidae		Brachionus	Brachionus calyciflorus
B	3	low	261056	BOLD:AAI8740	40	9	9	11	77.5	10573489	203.775	31.3459	203.775	99.4706	SYS-CRLNONARTHINVERT	Cnidaria	Hydrozoa	Anthoathecata	Hydridae		Hydra	Hydra sp., Hydra oligactis
B	3	low	261056	BOLD:ADM2098	43	11	11	10	74.4186	10573489	204.488	32.3126	204.488	99.4428	SYS-CRLNONARTHINVERT	Rotifera	Monogononta	Ploima	Asplanchnidae		Asplanchna	Asplanchna sp. WM-2017a
B	3	low	261056	BOLD:ACC9943	77	8	8	1	89.6104	10573489	202.87	36.9667	202.87	99.4941	SYS-CRLINSECTA	Arthropoda	Insecta	Diptera	Chironomidae	Orthocladiinae	Nanocladius	Nanocladius distinctus, Nanocladius sp.
B	3	low	261056	BOLD:ABA0395	89	8	8	9	91.0112	10573489	203.629	34.9927	204.404	97.0726	SYS-CRLNONARTHINVERT	Rotifera	Monogononta	Ploima	Brachionidae		Keratella	Keratella cochlearis
B	3	low	261056	BOLD:ACS3733	127	25	25	8	80.315	10573489	172.858	33.5168	203.583	99.7318	SYS-CRLNONARTHINVERT	Rotifera	Monogononta	Ploima	Brachionidae		Brachionus	Brachionus angularis
B	3	low	261056	BOLD:ACL2016	160	18	18	7	88.75	10573489	203.756	36.4218	203.756	98.4939	SYS-CRLNONARTHINVERT	Rotifera	Monogononta	Ploima	Brachionidae		Keratella	Keratella cochlearis
B	3	low	261056	BOLD:ACH9570	182	37	37	6	79.6703	10573489	201.802	39.5273	201.901	99.4616	SYS-CRLNONARTHINVERT	Rotifera	Monogononta	Ploima	Brachionidae		Keratella	Keratella cochlearis
B	3	low	261056	BOLD:AAZ5138	268	49	49	5	81.7164	10573489	202.347	41.3895	202.347	98.7294	SYS-CRLNONARTHINVERT	Rotifera	Monogononta	Ploima	Brachionidae		Keratella	Keratella sp. WM-2017a, Keratella tecta, Keratella cochlearis
B	3	low	261056	BOLD:ACH9569	445	104	104	4	76.6292	10573489	201.238	38.0716	202.22	98.616	SYS-CRLNONARTHINVERT	Rotifera	Monogononta	Ploima	Brachionidae		Keratella	Keratella cochlearis
B	3	low	261056	BOLD:ADM0809	1942	18	18	3	99.0731	10573489	204.357	37.3903	204.357	97.0659	SYS-CRLNONARTHINVERT	Rotifera	Monogononta	Ploima	Trichocercidae		Trichocerca	Trichocerca sp. WM-2017e
B	3	low	261056	BOLD:ADM1474	2536	82	82	2	96.7666	10573489	201.582	38.8501	201.582	97.0746	SYS-CRLNONARTHINVERT	Rotifera	Monogononta	Ploima	Synchaetidae		Polyarthra	Polyarthra sp. WM-2017e
B	3	low	261056	BOLD:AAR9097	3799	403	403	1	89.3919	10573489	190.655	32.9362	203.392	99.9454	SYS-CRLNONARTHINVERT	Cnidaria	Hydrozoa	Anthoathecata	Oceaniidae		Cordylophora	Cordylophora sp. WH1, Cordylophora sp. IM1, Cordylophora sp. JC1
B	4	high	201332	BOLD:AEC4149	6	3	3	1	50	8680880	204	32.8439	204	100	SYS-CRLINSECTA	Arthropoda	Insecta	Diptera	Chironomidae
B	4	high	201332	BOLD:ACC0012	58	18	18	4	68.9655	8680880	201.983	27.4054	201.983	99.4438	SYS-CRLNONARTHINVERT	Rotifera	Monogononta	Ploima	Synchaetidae		Synchaeta	Synchaeta kitina
B	4	high	201332	BOLD:ABA0395	194	9	9	2	95.3608	8680880	204.495	34.9684	204.495	97.0659	SYS-CRLNONARTHINVERT	Rotifera	Monogononta	Ploima	Brachionidae		Keratella	Keratella cochlearis
B	4	high	201332	BOLD:AAC8490	599	118	118	1	80.3005	8680880	198.284	50.3064	198.26	99.9346	SYS-CRLCHORDATA	Chordata	Actinopterygii	Osmeriformes	Osmeridae		Osmerus	Osmerus eperlanus
B	4	high	201332	BOLD:AAR9097	2975	316	316	1	89.3782	8680880	190.528	32.9331	203.102	99.9504	SYS-CRLNONARTHINVERT	Cnidaria	Hydrozoa	Anthoathecata	Oceaniidae		Cordylophora	Cordylophora sp. WH1, Cordylophora sp. IM1, Cordylophora sp. JC1
B	5	high	242998	BOLD:ADL9757	3	2	2	2	33.3333	10246817	16	40.2036	131	100	SYS-CRLINSECTA	Arthropoda	Insecta	Diptera	Tephritidae	Dacinae	Dacus	Dacus formosanus
B	5	high	242998	BOLD:ADM0810	4	4	4	11	0	10246817	118.25	37.2018	118.25	97.4597	SYS-CRLNONARTHINVERT	Rotifera	Monogononta	Ploima	Trichocercidae		Trichocerca	Trichocerca sp. WM-2017e
B	5	high	242998	BOLD:AAX2675	5	4	4	1	20	10246817	202.4	35.1838	202.4	100	SYS-CRLINSECTA	Arthropoda	Insecta	Diptera	Chironomidae	Chironominae	Parachironomus	Parachironomus frequens
B	5	high	242998	BOLD:ABA0395	6	2	2	10	66.6667	10246817	204.833	35.0689	204.833	97.0708	SYS-CRLNONARTHINVERT	Rotifera	Monogononta	Ploima	Brachionidae		Keratella	Keratella cochlearis
B	5	high	242998	BOLD:AAD5733	9	3	3	2	66.6667	10246817	172.111	48.3309	189.667	97.0949	DS-GBOLFISH	Chordata	Actinopterygii	Cypriniformes	Cyprinidae	Leuciscinae	Leuciscus	Leuciscus leuciscus
B	5	high	242998	BOLD:ACC0035	12	7	7	9	41.6667	10246817	186.417	33.3492	203.417	99.6659	SYS-CRLNONARTHINVERT	Rotifera	Monogononta	Ploima	Synchaetidae		Polyarthra	Polyarthra dolichoptera
B	5	high	242998	BOLD:AAZ5138	25	11	11	7	56	10246817	203	41.2341	203	98.702	SYS-CRLNONARTHINVERT	Rotifera	Monogononta	Ploima	Brachionidae		Keratella	Keratella sp. WM-2017a, Keratella tecta, Keratella cochlearis
B	5	high	242998	BOLD:ACH6274	25	14	14	7	44	10246817	190.6	34.7724	201	99.9064	SYS-CRLNONARTHINVERT	Rotifera	Monogononta	Ploima	Synchaetidae		Polyarthra	Polyarthra dolichoptera
B	5	high	242998	BOLD:ACL2016	234	26	26	6	88.8889	10246817	204.226	36.4066	204.226	98.495	SYS-CRLNONARTHINVERT	Rotifera	Monogononta	Ploima	Brachionidae		Keratella	Keratella cochlearis
B	5	high	242998	BOLD:ACH9570	250	48	48	5	80.8	10246817	201.352	39.7203	201.4	99.4204	SYS-CRLNONARTHINVERT	Rotifera	Monogononta	Ploima	Brachionidae		Keratella	Keratella cochlearis
B	5	high	242998	BOLD:ACH9569	306	56	56	4	81.6993	10246817	201.395	38.0615	202.373	98.5008	SYS-CRLNONARTHINVERT	Rotifera	Monogononta	Ploima	Brachionidae		Keratella	Keratella cochlearis
B	5	high	242998	BOLD:ADM1474	368	84	84	3	77.1739	10246817	156.894	40.3418	156.946	97.3967	SYS-CRLNONARTHINVERT	Rotifera	Monogononta	Ploima	Synchaetidae		Polyarthra	Polyarthra sp. WM-2017e
B	5	high	242998	BOLD:AAR9097	1425	185	185	2	87.0175	10246817	190.747	32.9984	203.384	99.9483	SYS-CRLNONARTHINVERT	Cnidaria	Hydrozoa	Anthoathecata	Oceaniidae		Cordylophora	Cordylophora sp. WH1, Cordylophora sp. IM1, Cordylophora sp. JC1
B	5	high	242998	BOLD:ADM0809	1642	18	18	1	98.9038	10246817	204.307	37.4008	204.317	97.0662	SYS-CRLNONARTHINVERT	Rotifera	Monogononta	Ploima	Trichocercidae		Trichocerca	Trichocerca sp. WM-2017e
B	6	high	31256	BOLD:ACH6274	5	4	4	6	20	1322905	197	34.7647	204.8	98.6892	SYS-CRLNONARTHINVERT	Rotifera	Monogononta	Ploima	Synchaetidae		Polyarthra	Polyarthra dolichoptera
B	6	high	31256	BOLD:ACH9570	87	20	20	4	77.0115	1322905	202.31	39.8056	202.333	99.4488	SYS-CRLNONARTHINVERT	Rotifera	Monogononta	Ploima	Brachionidae		Keratella	Keratella cochlearis
B	6	high	31256	BOLD:ACL2016	87	12	12	4	86.2069	1322905	204.575	36.4468	204.575	98.4997	SYS-CRLNONARTHINVERT	Rotifera	Monogononta	Ploima	Brachionidae		Keratella	Keratella cochlearis
B	6	high	31256	BOLD:ACH9569	193	46	46	2	76.1658	1322905	201.124	38.297	202.098	98.8528	SYS-CRLNONARTHINVERT	Rotifera	Monogononta	Ploima	Brachionidae		Keratella	Keratella cochlearis
B	6	high	31256	BOLD:AAR9097	309	48	48	1	84.466	1322905	190.783	32.912	203.56	99.9109	SYS-CRLNONARTHINVERT	Cnidaria	Hydrozoa	Anthoathecata	Oceaniidae		Cordylophora	Cordylophora sp. WH1, Cordylophora sp. IM1, Cordylophora sp. JC1
C	1	high	353822	BOLD:ADN4852	14	8	8	2	42.8571	14581149	17.3571	44.258	177.357	100	SYS-CRLINSECTA	Arthropoda	Insecta	Hymenoptera	Formicidae	Formicinae	Camponotus	Camponotus MG053
C	1	high	353822	BOLD:AAW3990	19	5	5	1	73.6842	14581149	202.895	35.52	202.895	100	SYS-CRLINSECTA	Arthropoda	Insecta	Diptera	Chironomidae	Chironominae	Chironomus	Chironomus balatonicus, Chironomus cf. nudiventris, Chironomus plumosus
C	1	high	353822	BOLD:ACG1122	22	8	8	22	63.6364	14581149	203.227	39.4975	203.045	99.7525	SYS-CRLNONARTHINVERT	Annelida	Polychaeta	Spionida	Spionidae		Scolelepis, Scolepsis	Scolelepis foliosa, Scolelepis squamata, Scolepsis squamata
C	1	high	353822	BOLD:ACB6833	24	8	8	21	66.6667	14581149	204.417	34.4905	204.417	99.9592	SYS-CRLNONARTHINVERT	Annelida	Clitellata	Haplotaxida	Naididae	Naidinae	Nais	Nais elinguis
C	1	high	353822	BOLD:ABA7390	26	13	13	20	50	14581149	200.346	38.3721	200.346	99.4312	SYS-CRLNONARTHINVERT	Rotifera	Monogononta	Ploima	Brachionidae		Brachionus	Brachionus quadridentatus
C	1	high	353822	BOLD:AAR9097	53	12	12	19	77.3585	14581149	191.283	33.404	204.019	99.7954	SYS-CRLNONARTHINVERT	Cnidaria	Hydrozoa	Anthoathecata	Oceaniidae		Cordylophora	Cordylophora sp. WH1, Cordylophora sp. IM1, Cordylophora sp. JC1
C	1	high	353822	BOLD:ACC0012	86	14	14	18	83.7209	14581149	204.547	27.0649	204.547	99.7156	SYS-CRLNONARTHINVERT	Rotifera	Monogononta	Ploima	Synchaetidae		Synchaeta	Synchaeta kitina
C	1	high	353822	BOLD:AAC2296	101	28	28	17	72.2772	14581149	203.059	34.7628	203.059	99.9117	SYS-CRLNONARTHINVERT	Mollusca	Bivalvia	Venerida	Cyrenidae		Corbicula	Corbicula sp. 21De7, Corbicula sp. 54WC3, Corbicula sp. 02A15, Corbicula sp. 24Le3, Corbicula sp. 37Virg2, Corbicula North American form A, Corbicula sp. Taiwan, Corbicula sp. 29HK2, Corbicula sp. 20De6, Corbicula sp. DTH10, Corbicula sp. 19560_34, Corbicula leana, Corbicula sp. 55WC5, Corbicula sp. 12B19, Corbicula sp. 14B4, Corbicula sp. 36Virg1, Corbicula sp. 27Wi9, Corbicula sp. 58Sao1, Corbi…
C	1	high	353822	BOLD:ADX1250	136	33	33	15	75.7353	14581149	179.971	41.1518	202.294	99.9236	SYS-CRLNONARTHINVERT	Rotifera	Monogononta	Ploima	Synchaetidae		Polyarthra	Polyarthra vulgaris
C	1	high	353822	BOLD:ABA0395	149	12	12	14	91.9463	14581149	202.591	35.0963	204.443	97.0994	SYS-CRLNONARTHINVERT	Rotifera	Monogononta	Ploima	Brachionidae		Keratella	Keratella cochlearis
C	1	high	353822	BOLD:ACS3733	189	29	29	13	84.6561	14581149	173.164	33.7119	203.487	99.9262	SYS-CRLNONARTHINVERT	Rotifera	Monogononta	Ploima	Brachionidae		Brachionus	Brachionus angularis
C	1	high	353822	BOLD:ADM0810	208	49	49	12	76.4423	14581149	184.808	36.3659	184.808	98.641	SYS-CRLNONARTHINVERT	Rotifera	Monogononta	Ploima	Trichocercidae		Trichocerca	Trichocerca sp. WM-2017e
C	1	high	353822	BOLD:ADL9176	228	42	42	11	81.5789	14581149	203.346	31.4772	203.346	99.6899	SYS-CRLNONARTHINVERT	Rotifera	Monogononta	Ploima	Trichocercidae		Trichocerca	Trichocerca sp. WM-2017b
C	1	high	353822	BOLD:ADW8541	279	49	49	10	82.4373	14581149	193.057	35.5157	203.122	98.549	SYS-CRLNONARTHINVERT	Rotifera	Monogononta	Ploima	Synchaetidae		Polyarthra	Polyarthra sp. EM-2017
C	1	high	353822	BOLD:ADM1568	436	56	56	9	87.156	14581149	203.805	31.2262	204.44	99.9041	SYS-CRLNONARTHINVERT	Rotifera	Monogononta	Ploima	Brachionidae		Brachionus	Brachionus calyciflorus
C	1	high	353822	BOLD:AAD8427	437	57	57	8	86.9565	14581149	202.719	31.8123	203.709	99.7777	SYS-CRLNONARTHINVERT	Rotifera	Monogononta	Ploima	Brachionidae		Brachionus	Brachionus calyciflorus
C	1	high	353822	BOLD:ADX0390	562	65	65	7	88.4342	14581149	202.842	36.9604	202.842	98.3438	SYS-CRLNONARTHINVERT	Rotifera	Monogononta	Ploima	Brachionidae		Anuraeopsis	Anuraeopsis sp. WM-2017a
C	1	high	353822	BOLD:AAZ5138	640	136	136	6	78.75	14581149	202.253	41.1979	202.253	98.4275	SYS-CRLNONARTHINVERT	Rotifera	Monogononta	Ploima	Brachionidae		Keratella	Keratella sp. WM-2017a, Keratella tecta, Keratella cochlearis
C	1	high	353822	BOLD:ACL2016	1909	175	175	5	90.8329	14581149	204.19	36.4314	204.19	98.4809	SYS-CRLNONARTHINVERT	Rotifera	Monogononta	Ploima	Brachionidae		Keratella	Keratella cochlearis
C	1	high	353822	BOLD:ACH9570	2124	282	282	4	86.7232	14581149	201.709	39.5569	201.789	99.451	SYS-CRLNONARTHINVERT	Rotifera	Monogononta	Ploima	Brachionidae		Keratella	Keratella cochlearis
C	1	high	353822	BOLD:ACH9569	5480	594	594	3	89.1606	14581149	201.585	37.6901	202.571	97.9302	SYS-CRLNONARTHINVERT	Rotifera	Monogononta	Ploima	Brachionidae		Keratella	Keratella cochlearis
C	1	high	353822	BOLD:ADM1474	5706	119	119	2	97.9145	14581149	201.678	38.8494	201.677	97.0739	SYS-CRLNONARTHINVERT	Rotifera	Monogononta	Ploima	Synchaetidae		Polyarthra	Polyarthra sp. WM-2017e
C	1	high	353822	BOLD:ADM0809	24156	321	321	1	98.6711	14581149	204.243	37.3374	204.243	97.121	SYS-CRLNONARTHINVERT	Rotifera	Monogononta	Ploima	Trichocercidae		Trichocerca	Trichocerca sp. WM-2017e
C	2	high	304412	BOLD:ACC0012	4	3	3	24	25	12814615	205	26.7073	205	100	SYS-CRLNONARTHINVERT	Rotifera	Monogononta	Ploima	Synchaetidae		Synchaeta	Synchaeta kitina
C	2	high	304412	BOLD:ADV9591	4	4	4	24	0	12814615	199.5	39.1659	199.5	98.982	SYS-CRLNONARTHINVERT	Rotifera	Monogononta	Ploima	Synchaetidae		Polyarthra	Polyarthra sp. WM-2017c
C	2	high	304412	BOLD:ADX1250	6	5	5	23	16.6667	12814615	179.833	40.868	202.833	99.3512	SYS-CRLNONARTHINVERT	Rotifera	Monogononta	Ploima	Synchaetidae		Polyarthra	Polyarthra vulgaris
C	2	high	304412	BOLD:ACF5867	7	4	4	22	42.8571	12814615	204.143	35.3422	204.143	99.7206	SYS-CRLNONARTHINVERT	Mollusca	Bivalvia	Venerida	Cyrenidae		Corbicula	Corbicula sp. LB22, Corbicula North American form B, Corbicula sp. 33IL3, Corbicula sp. 34IL4, Corbicula North American form C, Corbicula sp. LB81, Corbicula sp. PKa-2002, Corbicula sp. 56Rho1, Corbicula sp. 57Rho2, Corbicula sp. 32IL2, Corbicula sp. 31IL1, Corbicula sp., Corbicula sp. LB59, Corbicula leana, Corbicula sp. LB1, Corbicula sp. LB5, Corbicula sp. LB6, Corbicula africana, Corbicula fl…
C	2	high	304412	BOLD:AAD0682	8	6	6	21	25	12814615	202.75	36.3852	202.75	99.8768	SYS-CRLNONARTHINVERT	Mollusca	Bivalvia	Myida	Dreissenidae		Dreissena	Dreissena rostriformis, Dreissena bugensis, Dreissena polymorpha
C	2	high	304412	BOLD:ACB6809	16	11	11	20	31.25	12814615	203	36.8906	203	98.2793	SYS-CRLNONARTHINVERT	Annelida	Clitellata	Haplotaxida	Naididae	Naidinae	Chaetogaster	Chaetogaster diaphanus
C	2	high	304412	BOLD:AAR9097	50	10	10	18	80	12814615	190.74	32.8844	203.74	99.9902	SYS-CRLNONARTHINVERT	Cnidaria	Hydrozoa	Anthoathecata	Oceaniidae		Cordylophora	Cordylophora sp. WH1, Cordylophora sp. IM1, Cordylophora sp. JC1
C	2	high	304412	BOLD:AAD8427	54	14	14	17	74.0741	12814615	203	31.9437	204	99.9546	SYS-CRLNONARTHINVERT	Rotifera	Monogononta	Ploima	Brachionidae		Brachionus	Brachionus calyciflorus
C	2	high	304412	BOLD:ADM0810	57	24	24	16	57.8947	12814615	142.228	37.8143	142.228	97.8799	SYS-CRLNONARTHINVERT	Rotifera	Monogononta	Ploima	Trichocercidae		Trichocerca	Trichocerca sp. WM-2017e
C	2	high	304412	BOLD:ABA0395	101	8	8	15	92.0792	12814615	203.891	35.0399	204.574	97.079	SYS-CRLNONARTHINVERT	Rotifera	Monogononta	Ploima	Brachionidae		Keratella	Keratella cochlearis
C	2	high	304412	BOLD:AAC2296	116	27	27	14	76.7241	12814615	203.638	34.8118	203.638	99.8982	SYS-CRLNONARTHINVERT	Mollusca	Bivalvia	Venerida	Cyrenidae		Corbicula	Corbicula sp. 21De7, Corbicula sp. 54WC3, Corbicula sp. 02A15, Corbicula sp. 24Le3, Corbicula sp. 37Virg2, Corbicula North American form A, Corbicula sp. Taiwan, Corbicula sp. 29HK2, Corbicula sp. 20De6, Corbicula sp. DTH10, Corbicula sp. 19560_34, Corbicula leana, Corbicula sp. 55WC5, Corbicula sp. 12B19, Corbicula sp. 14B4, Corbicula sp. 36Virg1, Corbicula sp. 27Wi9, Corbicula sp. 58Sao1, Corbi…
C	2	high	304412	BOLD:ADW8541	117	26	26	13	77.7778	12814615	194.077	35.2413	203.761	98.5687	SYS-CRLNONARTHINVERT	Rotifera	Monogononta	Ploima	Synchaetidae		Polyarthra	Polyarthra sp. EM-2017
C	2	high	304412	BOLD:ADM1568	141	16	16	12	88.6525	12814615	203.908	31.1895	203.908	99.9238	SYS-CRLNONARTHINVERT	Rotifera	Monogononta	Ploima	Brachionidae		Brachionus	Brachionus calyciflorus
C	2	high	304412	BOLD:ABA7390	165	30	30	11	81.8182	12814615	203.679	38.2901	203.679	99.4599	SYS-CRLNONARTHINVERT	Rotifera	Monogononta	Ploima	Brachionidae		Brachionus	Brachionus quadridentatus
C	2	high	304412	BOLD:ADL9176	178	35	35	10	80.3371	12814615	203.601	32.2885	203.601	98.904	SYS-CRLNONARTHINVERT	Rotifera	Monogononta	Ploima	Trichocercidae		Trichocerca	Trichocerca sp. WM-2017b
C	2	high	304412	BOLD:ADM0790	247	39	39	9	84.2105	12814615	202.518	35.23	202.526	98.2471	SYS-CRLNONARTHINVERT	Rotifera	Monogononta	Ploima	Brachionidae
C	2	high	304412	BOLD:AAZ5138	266	88	88	8	66.9173	12814615	200.853	40.9331	200.853	98.5009	SYS-CRLNONARTHINVERT	Rotifera	Monogononta	Ploima	Brachionidae		Keratella	Keratella sp. WM-2017a, Keratella tecta, Keratella cochlearis
C	2	high	304412	BOLD:ACH9570	366	70	70	7	80.8743	12814615	200.746	39.894	200.751	99.449	SYS-CRLNONARTHINVERT	Rotifera	Monogononta	Ploima	Brachionidae		Keratella	Keratella cochlearis
C	2	high	304412	BOLD:ACL2016	388	48	48	6	87.6289	12814615	204.268	36.4259	204.268	98.4881	SYS-CRLNONARTHINVERT	Rotifera	Monogononta	Ploima	Brachionidae		Keratella	Keratella cochlearis
C	2	high	304412	BOLD:ACS3733	420	78	78	5	81.4286	12814615	174.283	33.4761	203.476	99.4455	SYS-CRLNONARTHINVERT	Rotifera	Monogononta	Ploima	Brachionidae		Brachionus	Brachionus angularis
C	2	high	304412	BOLD:ADX0390	694	93	93	4	86.5994	12814615	202.915	37.2064	202.915	97.4309	SYS-CRLNONARTHINVERT	Rotifera	Monogononta	Ploima	Brachionidae		Anuraeopsis	Anuraeopsis sp. WM-2017a
C	2	high	304412	BOLD:ADM1474	1622	68	68	3	95.8076	12814615	200.113	38.9102	200.113	97.0857	SYS-CRLNONARTHINVERT	Rotifera	Monogononta	Ploima	Synchaetidae		Polyarthra	Polyarthra sp. WM-2017e
C	2	high	304412	BOLD:ACH9569	2851	309	309	2	89.1617	12814615	201.682	37.3552	202.667	97.6821	SYS-CRLNONARTHINVERT	Rotifera	Monogononta	Ploima	Brachionidae		Keratella	Keratella cochlearis
C	2	high	304412	BOLD:ADM0809	19369	176	176	1	99.0913	12814615	204.317	37.3842	204.318	97.076	SYS-CRLNONARTHINVERT	Rotifera	Monogononta	Ploima	Trichocercidae		Trichocerca	Trichocerca sp. WM-2017e
C	3	high	302526	BOLD:AAC8592	4	4	4	1	0	12016140	186.75	44.2928	186.75	99.878	SYS-CRLCHORDATA	Chordata	Actinopterygii	Cypriniformes	Cyprinidae	Leuciscinae	Blicca, Abramis	Abramis brama, Blicca bjoerkna, Abramis brama X Rutilus rutilus, Abramis hybridUS01, Abramis hybridUS02
C	3	high	302526	BOLD:ACQ8983	8	3	3	2	62.5	12016140	202.625	36.4627	202.625	98.5192	SYS-CRLINSECTA	Arthropoda	Insecta	Diptera	Chironomidae	Chironominae	Tanytarsus	Tanytarsus brundini
C	3	high	302526	BOLD:ACS6655	8	4	4	22	50	12016140	180.375	35.7227	204.375	99.435	SYS-CRLNONARTHINVERT	Rotifera	Monogononta	Ploima	Brachionidae		Brachionus	Brachionus urceolaris
C	3	high	302526	BOLD:ADL9176	8	4	4	22	50	12016140	204.5	31.7914	204.5	99.4482	SYS-CRLNONARTHINVERT	Rotifera	Monogononta	Ploima	Trichocercidae		Trichocerca	Trichocerca sp. WM-2017b
C	3	high	302526	BOLD:AAP5616	9	5	5	1	44.4444	12016140	203.333	33.2244	203.333	98.3045	SYS-CRLINSECTA	Arthropoda	Insecta	Diptera	Chironomidae	Chironominae	Tanytarsus	Tanytarsus brundini
C	3	high	302526	BOLD:ABA0395	12	3	3	21	75	12016140	192.75	35.7039	204.25	97.1819	SYS-CRLNONARTHINVERT	Rotifera	Monogononta	Ploima	Brachionidae		Keratella	Keratella cochlearis
C	3	high	302526	BOLD:ACC0012	17	8	8	18	52.9412	12016140	204.294	26.7777	204.294	99.7696	SYS-CRLNONARTHINVERT	Rotifera	Monogononta	Ploima	Synchaetidae		Synchaeta	Synchaeta kitina
C	3	high	302526	BOLD:ACH9570	17	8	8	18	52.9412	12016140	203	38.2402	203.412	99.4784	SYS-CRLNONARTHINVERT	Rotifera	Monogononta	Ploima	Brachionidae		Keratella	Keratella cochlearis
C	3	high	302526	BOLD:AAF4424	24	6	6	17	75	12016140	204.917	31.5988	204.917	99.6748	SYS-CRLNONARTHINVERT	Rotifera	Monogononta	Ploima	Synchaetidae		Synchaeta	Synchaeta cf. tremula/oblonga, Synchaeta sp. AMD-2002, Synchaeta sp. WM-2017c, Synchaeta oblonga
C	3	high	302526	BOLD:AAM1380	25	8	8	16	68	12016140	170.84	26.381	204	99.8725	SYS-CRLNONARTHINVERT	Rotifera	Bdelloidea	Bdelloidea_order_incertae_sedis	Philodinidae		Rotaria	Rotaria rotatoria
C	3	high	302526	BOLD:ABA7390	47	15	15	14	68.0851	12016140	201.936	38.2459	201.936	99.4183	SYS-CRLNONARTHINVERT	Rotifera	Monogononta	Ploima	Brachionidae		Brachionus	Brachionus quadridentatus
C	3	high	302526	BOLD:ADA5634	53	14	14	13	73.5849	12016140	203.962	36.2162	203.962	99.9445	SYS-CRLNONARTHINVERT	Annelida	Clitellata	Haplotaxida	Naididae	Naidinae	Paranais	Paranais botniensis
C	3	high	302526	BOLD:ADM0810	61	25	25	12	59.0164	12016140	180.934	36.6844	180.934	98.5776	SYS-CRLNONARTHINVERT	Rotifera	Monogononta	Ploima	Trichocercidae		Trichocerca	Trichocerca sp. WM-2017e
C	3	high	302526	BOLD:AAR9097	161	29	29	11	81.9876	12016140	189.155	32.9179	202.068	99.9484	SYS-CRLNONARTHINVERT	Cnidaria	Hydrozoa	Anthoathecata	Oceaniidae		Cordylophora	Cordylophora sp. WH1, Cordylophora sp. IM1, Cordylophora sp. JC1
C	3	high	302526	BOLD:ADM0790	170	31	31	10	81.7647	12016140	203.235	35.1801	203.224	98.2114	SYS-CRLNONARTHINVERT	Rotifera	Monogononta	Ploima	Brachionidae
C	3	high	302526	BOLD:AAD8427	174	28	28	9	83.908	12016140	203.27	31.778	204.27	99.7995	SYS-CRLNONARTHINVERT	Rotifera	Monogononta	Ploima	Brachionidae		Brachionus	Brachionus calyciflorus
C	3	high	302526	BOLD:AAZ5138	190	57	57	8	70	12016140	201.232	41.134	201.232	98.4383	SYS-CRLNONARTHINVERT	Rotifera	Monogononta	Ploima	Brachionidae		Keratella	Keratella sp. WM-2017a, Keratella tecta, Keratella cochlearis
C	3	high	302526	BOLD:ACF5867	195	43	43	7	77.9487	12016140	203.19	35.5048	203.359	99.6718	SYS-CRLNONARTHINVERT	Mollusca	Bivalvia	Venerida	Cyrenidae		Corbicula	Corbicula sp. LB22, Corbicula North American form B, Corbicula sp. 33IL3, Corbicula sp. 34IL4, Corbicula North American form C, Corbicula sp. LB81, Corbicula sp. PKa-2002, Corbicula sp. 56Rho1, Corbicula sp. 57Rho2, Corbicula sp. 32IL2, Corbicula sp. 31IL1, Corbicula sp., Corbicula sp. LB59, Corbicula leana, Corbicula sp. LB1, Corbicula sp. LB5, Corbicula sp. LB6, Corbicula africana, Corbicula fl…
C	3	high	302526	BOLD:ADM1568	247	33	33	6	86.6397	12016140	204.045	31.408	204.603	99.7188	SYS-CRLNONARTHINVERT	Rotifera	Monogononta	Ploima	Brachionidae		Brachionus	Brachionus calyciflorus
C	3	high	302526	BOLD:AAC2296	371	63	63	5	83.0189	12016140	203.264	34.8199	203.264	99.912	SYS-CRLNONARTHINVERT	Mollusca	Bivalvia	Venerida	Cyrenidae		Corbicula	Corbicula sp. 21De7, Corbicula sp. 54WC3, Corbicula sp. 02A15, Corbicula sp. 24Le3, Corbicula sp. 37Virg2, Corbicula North American form A, Corbicula sp. Taiwan, Corbicula sp. 29HK2, Corbicula sp. 20De6, Corbicula sp. DTH10, Corbicula sp. 19560_34, Corbicula leana, Corbicula sp. 55WC5, Corbicula sp. 12B19, Corbicula sp. 14B4, Corbicula sp. 36Virg1, Corbicula sp. 27Wi9, Corbicula sp. 58Sao1, Corbi…
C	3	high	302526	BOLD:ADX0390	766	99	99	4	87.0757	12016140	203.008	37.1108	203.009	97.8271	SYS-CRLNONARTHINVERT	Rotifera	Monogononta	Ploima	Brachionidae		Anuraeopsis	Anuraeopsis sp. WM-2017a
C	3	high	302526	BOLD:ADM1474	1171	71	71	3	93.9368	12016140	197.315	38.96	197.313	97.1112	SYS-CRLNONARTHINVERT	Rotifera	Monogononta	Ploima	Synchaetidae		Polyarthra	Polyarthra sp. WM-2017e
C	3	high	302526	BOLD:ACH9569	1448	200	200	2	86.1878	12016140	201.682	37.6103	202.67	98.0516	SYS-CRLNONARTHINVERT	Rotifera	Monogononta	Ploima	Brachionidae		Keratella	Keratella cochlearis
C	3	high	302526	BOLD:ADM0809	7887	166	166	1	97.8953	12016140	204.276	37.2652	204.276	97.1458	SYS-CRLNONARTHINVERT	Rotifera	Monogononta	Ploima	Trichocercidae		Trichocerca	Trichocerca sp. WM-2017e
C	4	low	295728	BOLD:ACF5867	5	4	4	26	20	11767360	183.4	34.9979	183.4	99.6044	SYS-CRLNONARTHINVERT	Mollusca	Bivalvia	Venerida	Cyrenidae		Corbicula	Corbicula sp. LB22, Corbicula North American form B, Corbicula sp. 33IL3, Corbicula sp. 34IL4, Corbicula North American form C, Corbicula sp. LB81, Corbicula sp. PKa-2002, Corbicula sp. 56Rho1, Corbicula sp. 57Rho2, Corbicula sp. 32IL2, Corbicula sp. 31IL1, Corbicula sp., Corbicula sp. LB59, Corbicula leana, Corbicula sp. LB1, Corbicula sp. LB5, Corbicula sp. LB6, Corbicula africana, Corbicula fl…
C	4	low	295728	BOLD:AAF4424	6	4	4	25	33.3333	11767360	204.333	31.4894	204.333	99.5935	SYS-CRLNONARTHINVERT	Rotifera	Monogononta	Ploima	Synchaetidae		Synchaeta	Synchaeta cf. tremula/oblonga, Synchaeta sp. AMD-2002, Synchaeta sp. WM-2017c, Synchaeta oblonga
C	4	low	295728	BOLD:AAG8416	7	4	4	24	42.8571	11767360	202.286	38.2234	202.286	100	SYS-CRLNONARTHINVERT	Annelida	Clitellata	Haplotaxida	Naididae	Naidinae	Nais
C	4	low	295728	BOLD:AAG9538	12	7	7	1	41.6667	11767360	203.167	33.5479	203.667	99.1823	SYS-CRLNONINSECTARTH	Arthropoda	Branchiopoda	Anomopoda	Daphniidae		Daphnia
C	4	low	295728	BOLD:AAR9094	15	7	7	22	53.3333	11767360	202.867	31.1506	202.867	99.4369	SYS-CRLNONARTHINVERT	Cnidaria	Hydrozoa	Anthoathecata	Oceaniidae		Cordylophora	Cordylophora caspia, Cordylophora sp. NFR10, Cordylophora sp. NFR6, Cordylophora sp. NFR7, Cordylophora sp. NFR4, Cordylophora sp. NFR2, Cordylophora sp. NFR1
C	4	low	295728	BOLD:AAB7510	16	6	6	20	62.5	11767360	204.062	41.0752	204.062	99.9695	SYS-CRLNONARTHINVERT	Annelida	Clitellata	Haplotaxida	Lumbricidae		Eiseniella	Eiseniella tetraedra L2, Eiseniella tetraedra
C	4	low	295728	BOLD:ACB6809	16	7	7	20	56.25	11767360	202.938	36.8054	202.938	98.981	SYS-CRLNONARTHINVERT	Annelida	Clitellata	Haplotaxida	Naididae	Naidinae	Chaetogaster	Chaetogaster diaphanus
C	4	low	295728	BOLD:ABA0395	18	2	2	19	88.8889	11767360	204.667	35.0159	204.667	97.0684	SYS-CRLNONARTHINVERT	Rotifera	Monogononta	Ploima	Brachionidae		Keratella	Keratella cochlearis
C	4	low	295728	BOLD:ACC0012	20	10	10	17	50	11767360	204.1	27.094	204.1	99.7061	SYS-CRLNONARTHINVERT	Rotifera	Monogononta	Ploima	Synchaetidae		Synchaeta	Synchaeta kitina
C	4	low	295728	BOLD:ABA7390	73	17	17	16	76.7123	11767360	204.082	38.7443	204.082	99.0734	SYS-CRLNONARTHINVERT	Rotifera	Monogononta	Ploima	Brachionidae		Brachionus	Brachionus quadridentatus
C	4	low	295728	BOLD:AAZ5138	97	35	35	15	63.9175	11767360	203.289	41.2644	203.289	98.567	SYS-CRLNONARTHINVERT	Rotifera	Monogononta	Ploima	Brachionidae		Keratella	Keratella sp. WM-2017a, Keratella tecta, Keratella cochlearis
C	4	low	295728	BOLD:AAR9097	108	19	19	14	82.4074	11767360	190.861	33.1703	203.361	99.958	SYS-CRLNONARTHINVERT	Cnidaria	Hydrozoa	Anthoathecata	Oceaniidae		Cordylophora	Cordylophora sp. WH1, Cordylophora sp. IM1, Cordylophora sp. JC1
C	4	low	295728	BOLD:ADL9176	127	20	20	13	84.252	11767360	204.213	31.4907	204.213	99.7139	SYS-CRLNONARTHINVERT	Rotifera	Monogononta	Ploima	Trichocercidae		Trichocerca	Trichocerca sp. WM-2017b
C	4	low	295728	BOLD:ADX0390	264	38	38	12	85.6061	11767360	203.019	37.1683	203.019	97.3734	SYS-CRLNONARTHINVERT	Rotifera	Monogononta	Ploima	Brachionidae		Anuraeopsis	Anuraeopsis sp. WM-2017a
C	4	low	295728	BOLD:ADM0810	272	59	59	11	78.3088	11767360	181.798	36.4451	181.798	98.5846	SYS-CRLNONARTHINVERT	Rotifera	Monogononta	Ploima	Trichocercidae		Trichocerca	Trichocerca sp. WM-2017e
C	4	low	295728	BOLD:AAC2296	319	57	57	10	82.1317	11767360	202.765	34.81	202.768	99.9183	SYS-CRLNONARTHINVERT	Mollusca	Bivalvia	Venerida	Cyrenidae		Corbicula	Corbicula sp. 21De7, Corbicula sp. 54WC3, Corbicula sp. 02A15, Corbicula sp. 24Le3, Corbicula sp. 37Virg2, Corbicula North American form A, Corbicula sp. Taiwan, Corbicula sp. 29HK2, Corbicula sp. 20De6, Corbicula sp. DTH10, Corbicula sp. 19560_34, Corbicula leana, Corbicula sp. 55WC5, Corbicula sp. 12B19, Corbicula sp. 14B4, Corbicula sp. 36Virg1, Corbicula sp. 27Wi9, Corbicula sp. 58Sao1, Corbi…
C	4	low	295728	BOLD:ADW8541	342	61	61	9	82.1637	11767360	193.023	35.3631	203.143	98.7091	SYS-CRLNONARTHINVERT	Rotifera	Monogononta	Ploima	Synchaetidae		Polyarthra	Polyarthra sp. EM-2017
C	4	low	295728	BOLD:ADM1568	440	49	49	8	88.8636	11767360	203.541	31.2088	204.486	99.8843	SYS-CRLNONARTHINVERT	Rotifera	Monogononta	Ploima	Brachionidae		Brachionus	Brachionus calyciflorus
C	4	low	295728	BOLD:AAD8427	550	91	91	7	83.4545	11767360	202.725	31.787	203.716	99.7472	SYS-CRLNONARTHINVERT	Rotifera	Monogononta	Ploima	Brachionidae		Brachionus	Brachionus calyciflorus
C	4	low	295728	BOLD:ACH9570	627	90	90	6	85.6459	11767360	201.38	39.8581	201.386	99.4533	SYS-CRLNONARTHINVERT	Rotifera	Monogononta	Ploima	Brachionidae		Keratella	Keratella cochlearis
C	4	low	295728	BOLD:ACL2016	654	75	75	5	88.5321	11767360	204.202	36.4484	204.203	98.484	SYS-CRLNONARTHINVERT	Rotifera	Monogononta	Ploima	Brachionidae		Keratella	Keratella cochlearis
C	4	low	295728	BOLD:ACH9569	660	135	135	4	79.5455	11767360	201.095	37.6198	202.074	97.9472	SYS-CRLNONARTHINVERT	Rotifera	Monogononta	Ploima	Brachionidae		Keratella	Keratella cochlearis
C	4	low	295728	BOLD:ACS3733	1046	107	107	3	89.7706	11767360	172.702	33.1465	203.542	98.8901	SYS-CRLNONARTHINVERT	Rotifera	Monogononta	Ploima	Brachionidae		Brachionus	Brachionus angularis
C	4	low	295728	BOLD:ADM1474	2827	81	81	2	97.1348	11767360	200.889	38.8638	200.889	97.0788	SYS-CRLNONARTHINVERT	Rotifera	Monogononta	Ploima	Synchaetidae		Polyarthra	Polyarthra sp. WM-2017e
C	4	low	295728	BOLD:ADM0809	29349	341	341	1	98.8381	11767360	204.297	37.3025	204.297	97.1139	SYS-CRLNONARTHINVERT	Rotifera	Monogononta	Ploima	Trichocercidae		Trichocerca	Trichocerca sp. WM-2017e
C	5	low	290188	BOLD:AAP0990	8	2	2	27	75	11599538	205	32.9268	205	98.2927	SYS-CRLNONARTHINVERT	Rotifera	Monogononta	Ploima	Brachionidae		Brachionus	Brachionus quadridentatus f. brevispinus
C	5	low	290188	BOLD:AAJ3263	10	5	5	1	50	11599538	204.1	35.2281	204.1	99.2157	SYS-CRLINSECTA	Arthropoda	Insecta	Diptera	Chironomidae	Chironominae	Cladotanytarsus	Cladotanytarsus atridorsum
C	5	low	290188	BOLD:ADC8854	12	7	7	3	41.6667	11599538	199.333	46.3246	199.333	100	SYS-CRLCHORDATA	Chordata	Actinopterygii	Anguilliformes	Anguillidae		Anguilla	Anguilla anguilla, Anguilla rostrata
C	5	low	290188	BOLD:ABA0395	13	6	6	26	53.8462	11599538	198.846	35.2679	204.154	97.1735	SYS-CRLNONARTHINVERT	Rotifera	Monogononta	Ploima	Brachionidae		Keratella	Keratella cochlearis
C	5	low	290188	BOLD:AAF4424	14	4	4	25	71.4286	11599538	205	31.9512	205	99.5122	SYS-CRLNONARTHINVERT	Rotifera	Monogononta	Ploima	Synchaetidae		Synchaeta	Synchaeta cf. tremula/oblonga, Synchaeta sp. AMD-2002, Synchaeta sp. WM-2017c, Synchaeta oblonga
C	5	low	290188	BOLD:ACC0012	16	10	10	23	37.5	11599538	204.25	26.9906	204.25	99.7256	SYS-CRLNONARTHINVERT	Rotifera	Monogononta	Ploima	Synchaetidae		Synchaeta	Synchaeta kitina
C	5	low	290188	BOLD:ACH6274	16	8	8	23	50	11599538	193.75	34.7603	203.75	99.897	SYS-CRLNONARTHINVERT	Rotifera	Monogononta	Ploima	Synchaetidae		Polyarthra	Polyarthra dolichoptera
C	5	low	290188	BOLD:ACF5867	17	6	6	22	64.7059	11599538	203.529	35.6109	203.529	99.6831	SYS-CRLNONARTHINVERT	Mollusca	Bivalvia	Venerida	Cyrenidae		Corbicula	Corbicula sp. LB22, Corbicula North American form B, Corbicula sp. 33IL3, Corbicula sp. 34IL4, Corbicula North American form C, Corbicula sp. LB81, Corbicula sp. PKa-2002, Corbicula sp. 56Rho1, Corbicula sp. 57Rho2, Corbicula sp. 32IL2, Corbicula sp. 31IL1, Corbicula sp., Corbicula sp. LB59, Corbicula leana, Corbicula sp. LB1, Corbicula sp. LB5, Corbicula sp. LB6, Corbicula africana, Corbicula fl…
C	5	low	290188	BOLD:AAR9097	25	11	11	21	56	11599538	191.16	33.061	203.48	100	SYS-CRLNONARTHINVERT	Cnidaria	Hydrozoa	Anthoathecata	Oceaniidae		Cordylophora	Cordylophora sp. WH1, Cordylophora sp. IM1, Cordylophora sp. JC1
C	5	low	290188	BOLD:AAD8427	30	10	10	20	66.6667	11599538	203.367	31.7779	204.367	99.8038	SYS-CRLNONARTHINVERT	Rotifera	Monogononta	Ploima	Brachionidae		Brachionus	Brachionus calyciflorus
C	5	low	290188	BOLD:AAA3964	43	14	14	2	67.4419	11599538	196.837	42.1173	196.837	99.8995	SYS-CRLCHORDATA	Chordata	Mammalia	Rodentia	Muridae	Murinae	Mus	Mus musculus, Mus musculus C57BL/6J, Mus macedonicus
C	5	low	290188	BOLD:AAG9538	51	14	14	1	72.549	11599538	200.882	32.9417	201.882	98.4659	SYS-CRLNONINSECTARTH	Arthropoda	Branchiopoda	Anomopoda	Daphniidae		Daphnia
C	5	low	290188	BOLD:AAI8740	72	12	12	17	83.3333	11599538	203.819	31.3257	203.819	99.2064	SYS-CRLNONARTHINVERT	Cnidaria	Hydrozoa	Anthoathecata	Hydridae		Hydra	Hydra sp., Hydra oligactis
C	5	low	290188	BOLD:ACS3733	83	26	26	16	68.6747	11599538	173.627	33.6653	203.012	99.6214	SYS-CRLNONARTHINVERT	Rotifera	Monogononta	Ploima	Brachionidae		Brachionus	Brachionus angularis
C	5	low	290188	BOLD:AAD5733	110	43	43	1	60.9091	11599538	199.291	47.3879	199.291	99.4728	SYS-CRLCHORDATA	Chordata	Actinopterygii	Cypriniformes	Cyprinidae	Leuciscinae	Leuciscus	Leuciscus sp., Leuciscus leuciscus, Leuciscus baicalensis, Leuciscus idus
C	5	low	290188	BOLD:ACQ6471	129	31	31	15	75.969	11599538	203.884	35.418	203.884	98.9162	SYS-CRLNONARTHINVERT	Annelida	Clitellata	Enchytraeida	Propappidae		Propappus	Propappus volki
C	5	low	290188	BOLD:ADL9176	154	19	19	14	87.6623	11599538	203.864	31.5431	203.864	99.7178	SYS-CRLNONARTHINVERT	Rotifera	Monogononta	Ploima	Trichocercidae		Trichocerca	Trichocerca sp. WM-2017b
C	5	low	290188	BOLD:ADM1568	161	22	22	13	86.3354	11599538	204.05	31.3427	204.484	99.7723	SYS-CRLNONARTHINVERT	Rotifera	Monogononta	Ploima	Brachionidae		Brachionus	Brachionus calyciflorus
C	5	low	290188	BOLD:ABA7390	163	25	25	12	84.6626	11599538	203.534	38.346	203.534	99.4949	SYS-CRLNONARTHINVERT	Rotifera	Monogononta	Ploima	Brachionidae		Brachionus	Brachionus quadridentatus
C	5	low	290188	BOLD:ACH9166	205	36	36	11	82.439	11599538	184.844	36.2578	202.259	99.9227	SYS-CRLNONARTHINVERT	Rotifera	Monogononta	Ploima	Synchaetidae		Polyarthra
C	5	low	290188	BOLD:ADM0810	279	56	56	10	79.9283	11599538	187.742	36.3328	187.742	98.6765	SYS-CRLNONARTHINVERT	Rotifera	Monogononta	Ploima	Trichocercidae		Trichocerca	Trichocerca sp. WM-2017e
C	5	low	290188	BOLD:ADW8541	301	36	36	9	88.0399	11599538	194.266	36.6631	203.877	98.2378	SYS-CRLNONARTHINVERT	Rotifera	Monogononta	Ploima	Synchaetidae		Polyarthra	Polyarthra sp. EM-2017
C	5	low	290188	BOLD:AAC2296	355	78	78	8	78.0282	11599538	202.518	34.7979	202.518	99.8563	SYS-CRLNONARTHINVERT	Mollusca	Bivalvia	Venerida	Cyrenidae		Corbicula	Corbicula sp. 21De7, Corbicula sp. 54WC3, Corbicula sp. 02A15, Corbicula sp. 24Le3, Corbicula sp. 37Virg2, Corbicula North American form A, Corbicula sp. Taiwan, Corbicula sp. 29HK2, Corbicula sp. 20De6, Corbicula sp. DTH10, Corbicula sp. 19560_34, Corbicula leana, Corbicula sp. 55WC5, Corbicula sp. 12B19, Corbicula sp. 14B4, Corbicula sp. 36Virg1, Corbicula sp. 27Wi9, Corbicula sp. 58Sao1, Corbi…
C	5	low	290188	BOLD:AAZ5138	371	92	92	7	75.2022	11599538	202.45	41.0552	202.45	98.533	SYS-CRLNONARTHINVERT	Rotifera	Monogononta	Ploima	Brachionidae		Keratella	Keratella sp. WM-2017a, Keratella tecta, Keratella cochlearis
C	5	low	290188	BOLD:ACL2016	881	87	87	6	90.1249	11599538	204.143	36.4252	204.143	98.483	SYS-CRLNONARTHINVERT	Rotifera	Monogononta	Ploima	Brachionidae		Keratella	Keratella cochlearis
C	5	low	290188	BOLD:ACH9570	1014	141	141	5	86.0947	11599538	201.895	39.5014	201.986	99.4556	SYS-CRLNONARTHINVERT	Rotifera	Monogononta	Ploima	Brachionidae		Keratella	Keratella cochlearis
C	5	low	290188	BOLD:ADX0390	1042	84	84	4	91.9386	11599538	203.3	37.2236	203.299	97.4292	SYS-CRLNONARTHINVERT	Rotifera	Monogononta	Ploima	Brachionidae		Anuraeopsis	Anuraeopsis sp. WM-2017a
C	5	low	290188	BOLD:ACH9569	3166	416	416	3	86.8604	11599538	201.617	37.5971	202.604	98.108	SYS-CRLNONARTHINVERT	Rotifera	Monogononta	Ploima	Brachionidae		Keratella	Keratella cochlearis
C	5	low	290188	BOLD:ADM1474	6399	107	107	2	98.3279	11599538	201.982	38.8309	201.984	97.0724	SYS-CRLNONARTHINVERT	Rotifera	Monogononta	Ploima	Synchaetidae		Polyarthra	Polyarthra sp. WM-2017e
C	5	low	290188	BOLD:ADM0809	26834	294	294	1	98.9044	11599538	204.302	37.3357	204.302	97.1067	SYS-CRLNONARTHINVERT	Rotifera	Monogononta	Ploima	Trichocercidae		Trichocerca	Trichocerca sp. WM-2017e
C	6	low	363544	BOLD:AAD1749	3	3	3	2	0	14943197	202.333	43.0241	202.333	100	SYS-CRLCHORDATA	Chordata	Actinopterygii	Perciformes	Percidae	Luciopercinae	Sander, Stizostedion	Sander lucioperca, Sander canadensis, Stizostedion lucioperca
C	6	low	363544	BOLD:ACB5485	4	3	3	1	25	14943197	203.75	45.6485	203.75	99.5092	SYS-CRLNONINSECTARTH	Arthropoda	Branchiopoda	Haplopoda	Leptodoridae		Leptodora	Leptodora kindtii
C	6	low	363544	BOLD:AAA3964	7	5	5	1	28.5714	14943197	200	41.9853	200	100	SYS-CRLCHORDATA	Chordata	Mammalia	Rodentia	Muridae	Murinae	Mus	Mus musculus, Mus musculus C57BL/6J, Mus macedonicus
C	6	low	363544	BOLD:AAB7510	8	6	6	22	25	14943197	193.375	41.2432	193.375	100	SYS-CRLNONARTHINVERT	Annelida	Clitellata	Haplotaxida	Lumbricidae		Eiseniella	Eiseniella tetraedra L2, Eiseniella tetraedra
C	6	low	363544	BOLD:ADM0966	13	1	1	1	92.3077	14943197	16	49.0385	104	100	SYS-CRLINSECTA	Arthropoda	Insecta	Diptera	Tephritidae	Dacinae	Dacus	Dacus siamensis
C	6	low	363544	BOLD:ACF5867	20	7	7	21	65	14943197	202	35.5818	202.55	99.73	SYS-CRLNONARTHINVERT	Mollusca	Bivalvia	Venerida	Cyrenidae		Corbicula	Corbicula sp. LB22, Corbicula North American form B, Corbicula sp. 33IL3, Corbicula sp. 34IL4, Corbicula North American form C, Corbicula sp. LB81, Corbicula sp. PKa-2002, Corbicula sp. 56Rho1, Corbicula sp. 57Rho2, Corbicula sp. 32IL2, Corbicula sp. 31IL1, Corbicula sp., Corbicula sp. LB59, Corbicula leana, Corbicula sp. LB1, Corbicula sp. LB5, Corbicula sp. LB6, Corbicula africana, Corbicula fl…
C	6	low	363544	BOLD:AAF3606	25	7	7	20	72	14943197	203.68	33.9956	203.68	99.9804	SYS-CRLNONARTHINVERT	Annelida	Clitellata	Haplotaxida	Naididae	Naidinae	Stylaria	Stylaria lacustris
C	6	low	363544	BOLD:ACC0012	45	12	12	18	73.3333	14943197	204.133	27.3141	204.133	99.4776	SYS-CRLNONARTHINVERT	Rotifera	Monogononta	Ploima	Synchaetidae		Synchaeta	Synchaeta kitina
C	6	low	363544	BOLD:ADM0810	45	27	27	18	40	14943197	138.622	37.4198	138.622	97.7682	SYS-CRLNONARTHINVERT	Rotifera	Monogononta	Ploima	Trichocercidae		Trichocerca	Trichocerca sp. WM-2017e
C	6	low	363544	BOLD:ABA0395	83	7	7	16	91.5663	14943197	204.482	34.9686	204.482	97.0657	SYS-CRLNONARTHINVERT	Rotifera	Monogononta	Ploima	Brachionidae		Keratella	Keratella cochlearis
C	6	low	363544	BOLD:ACG5388	85	15	15	15	82.3529	14943197	202.2	36.2039	202.2	99.7244	SYS-CRLNONARTHINVERT	Rotifera	Monogononta	Ploima	Brachionidae		Brachionus	Brachionus budapestanensis, Brachionus budapestinensis
C	6	low	363544	BOLD:AAR9097	135	29	29	14	78.5185	14943197	189.689	33.049	201.956	99.9614	SYS-CRLNONARTHINVERT	Cnidaria	Hydrozoa	Anthoathecata	Oceaniidae		Cordylophora	Cordylophora sp. WH1, Cordylophora sp. IM1, Cordylophora sp. JC1
C	6	low	363544	BOLD:ABA7390	190	34	34	13	82.1053	14943197	202.574	38.2885	202.574	99.4471	SYS-CRLNONARTHINVERT	Rotifera	Monogononta	Ploima	Brachionidae		Brachionus	Brachionus quadridentatus
C	6	low	363544	BOLD:AAD8427	194	42	42	12	78.3505	14943197	202.505	31.7147	203.495	99.5089	SYS-CRLNONARTHINVERT	Rotifera	Monogononta	Ploima	Brachionidae		Brachionus	Brachionus calyciflorus
C	6	low	363544	BOLD:ADM1568	224	28	28	11	87.5	14943197	203.522	31.2253	204.147	99.8928	SYS-CRLNONARTHINVERT	Rotifera	Monogononta	Ploima	Brachionidae		Brachionus	Brachionus calyciflorus
C	6	low	363544	BOLD:ACH9570	246	45	45	10	81.7073	14943197	201.573	39.8689	201.573	99.4515	SYS-CRLNONARTHINVERT	Rotifera	Monogononta	Ploima	Brachionidae		Keratella	Keratella cochlearis
C	6	low	363544	BOLD:ACL2016	268	23	23	9	91.4179	14943197	204.396	36.4555	204.396	98.501	SYS-CRLNONARTHINVERT	Rotifera	Monogononta	Ploima	Brachionidae		Keratella	Keratella cochlearis
C	6	low	363544	BOLD:AAZ5138	269	75	75	8	72.119	14943197	201.981	40.9836	201.981	98.6532	SYS-CRLNONARTHINVERT	Rotifera	Monogononta	Ploima	Brachionidae		Keratella	Keratella sp. WM-2017a, Keratella tecta, Keratella cochlearis
C	6	low	363544	BOLD:ADX0390	390	49	49	7	87.4359	14943197	203.372	37.2026	203.367	97.3039	SYS-CRLNONARTHINVERT	Rotifera	Monogononta	Ploima	Brachionidae		Anuraeopsis	Anuraeopsis sp. WM-2017a
C	6	low	363544	BOLD:AAC2296	478	83	83	6	82.636	14943197	202.504	34.8002	202.506	99.9059	SYS-CRLNONARTHINVERT	Mollusca	Bivalvia	Venerida	Cyrenidae		Corbicula	Corbicula sp. 21De7, Corbicula sp. 54WC3, Corbicula sp. 02A15, Corbicula sp. 24Le3, Corbicula sp. 37Virg2, Corbicula North American form A, Corbicula sp. Taiwan, Corbicula sp. 29HK2, Corbicula sp. 20De6, Corbicula sp. DTH10, Corbicula sp. 19560_34, Corbicula leana, Corbicula sp. 55WC5, Corbicula sp. 12B19, Corbicula sp. 14B4, Corbicula sp. 36Virg1, Corbicula sp. 27Wi9, Corbicula sp. 58Sao1, Corbi…
C	6	low	363544	BOLD:ACH9569	1249	181	181	5	85.5084	14943197	201.484	37.556	202.468	98.0659	SYS-CRLNONARTHINVERT	Rotifera	Monogononta	Ploima	Brachionidae		Keratella	Keratella cochlearis
C	6	low	363544	BOLD:ADW8541	1319	92	92	4	93.025	14943197	194	35.0629	203.655	98.1878	SYS-CRLNONARTHINVERT	Rotifera	Monogononta	Ploima	Synchaetidae		Polyarthra	Polyarthra sp. EM-2017
C	6	low	363544	BOLD:ACS3733	1420	177	177	3	87.5352	14943197	173.682	33.3672	203.311	99.414	SYS-CRLNONARTHINVERT	Rotifera	Monogononta	Ploima	Brachionidae		Brachionus	Brachionus angularis
C	6	low	363544	BOLD:ADM1474	2960	80	80	2	97.2973	14943197	201.259	38.8694	201.264	97.0742	SYS-CRLNONARTHINVERT	Rotifera	Monogononta	Ploima	Synchaetidae		Polyarthra	Polyarthra sp. WM-2017e
C	6	low	363544	BOLD:ADM0809	14091	287	287	1	97.9632	14943197	204.236	37.2646	204.239	97.1222	SYS-CRLNONARTHINVERT	Rotifera	Monogononta	Ploima	Trichocercidae		Trichocerca	Trichocerca sp. WM-2017e
D	2		235784	BOLD:AAL1506	3	3	3	34	0	9231483	199.667	34.8892	199.667	99.8273	SYS-CRLNONARTHINVERT	Annelida	Clitellata	Haplotaxida	Naididae	Naidinae	Dero	Dero sp. 1 AEB-2009, Dero sp. Jemmerson Slough-AEB-2002
D	2		235784	BOLD:ACP6608	3	3	3	80	0	9231483	174.667	32.9656	196.333	98.3714	SYS-CRLINSECTA	Arthropoda	Insecta	Diptera	Chironomidae	Tanypodinae	Tanypus	Tanypus kraatzi
D	2		235784	BOLD:ACY6524	3	3	3	80	0	9231483	203.333	32.3529	204	98.0311	SYS-CRLINSECTA	Arthropoda	Insecta	Diptera	Chironomidae	Orthocladiinae	Psectrocladius	Psectrocladius cf. limbatellus
D	2		235784	BOLD:ADT5837	3	1	1	80	66.6667	9231483	205	34.1463	205	98.0488	SYS-CRLINSECTA	Arthropoda	Insecta	Diptera
D	2		235784	BOLD:AAA8488	3	3	3	11	0	9231483	204	47.0588	204	99.6732	SYS-CRLCHORDATA	Chordata	Actinopterygii	Scorpaeniformes	Gasterosteidae		Gasterosteus	Gasterosteus gymnurus, Gasterosteus sp., Gasterosteus islandicus, Gasterosteus aculeatus
D	2		235784	BOLD:AAX0441	4	4	4	31	0	9231483	204.5	35.208	204.5	99.7555	SYS-CRLNONARTHINVERT	Annelida	Clitellata	Haplotaxida	Naididae	Naidinae	Ophidonais	Ophidonais serpentina
D	2		235784	BOLD:ACB6480	4	4	4	31	0	9231483	203.5	36.9781	203.5	100	SYS-CRLNONARTHINVERT	Annelida	Clitellata	Haplotaxida	Naididae	Naidinae	Nais
D	2		235784	BOLD:ADJ7242	4	3	3	31	25	9231483	196.25	36.4074	196.25	99.8656	SYS-CRLNONARTHINVERT	Annelida	Clitellata	Haplotaxida	Naididae	Tubificinae	Limnodrilus	Limnodrilus claparedianus
D	2		235784	BOLD:AAO0954	4	2	2	75	50	9231483	204.5	28.8498	204.5	100	SYS-CRLINSECTA	Arthropoda	Insecta	Coleoptera	Carabidae	Omophroninae	Omophron	Omophron limbatum
D	2		235784	BOLD:AAG5487	4	4	4	75	0	9231483	204	30.7615	204	99.6317	SYS-CRLINSECTA	Arthropoda	Insecta	Diptera	Chironomidae	Tanypodinae	Procladius	Procladius choreus-agg.cinereus-t., Procladius ferrugineus, Procladius crassinervis
D	2		235784	BOLD:AAW4002	4	2	2	75	50	9231483	203.5	38.0802	203.5	100	SYS-CRLINSECTA	Arthropoda	Insecta	Diptera	Chironomidae	Chironominae	Chironomus	Chironomus commutatus, Chironomus cingulatus, Chironomus lacunarius, Chironomus bernensis
D	2		235784	BOLD:ADE9664	4	4	4	75	0	9231483	203.5	33.4152	203.5	99.5104	SYS-CRLINSECTA	Arthropoda	Insecta	Diptera	Chironomidae	Chironominae	Cryptochironomus	Cryptochironomus obreptans, Cryptochironomus albofasciatus
D	2		235784	BOLD:ADF1310	4	3	3	75	25	9231483	202.75	29.4665	202.75	99.8762	SYS-CRLINSECTA	Arthropoda	Insecta	Diptera	Chironomidae	Tanypodinae	Procladius	Procladius crassinervis
D	2		235784	BOLD:AEC4774	4	3	3	15	25	9231483	203	35.3508	203	98.4099	SYS-CRLNONINSECTARTH	Arthropoda	Malacostraca	Isopoda	Asellidae		Asellus, Asselus	Asellus aquaticus, Asselus aquaticus
D	2		235784	BOLD:AAA3964	4	3	3	10	25	9231483	202.5	42.2539	202.5	100	SYS-CRLCHORDATA	Chordata	Mammalia	Rodentia	Muridae	Murinae	Mus	Mus musculus, Mus musculus C57BL/6J, Mus macedonicus
D	2		235784	BOLD:ACK5110	5	4	4	30	20	9231483	183.2	40.2288	183.2	99.61	SYS-CRLNONARTHINVERT	Annelida	Clitellata	Haplotaxida	Naididae	Tubificinae	Potamothrix	Potamothrix moldaviensis
D	2		235784	BOLD:AEC2770	5	5	5	74	0	9231483	146	46.0306	146	97.5396	SYS-CRLINSECTA	Arthropoda	Insecta	Lepidoptera	Sphingidae	Macroglossinae	Perigonia	Perigonia lusca
D	2		235784	BOLD:AAC7275	5	4	4	9	20	9231483	190.4	50.667	190.4	99.5093	SYS-CRLCHORDATA	Chordata	Aves	Anseriformes	Anatidae		Anser	Anser fabalis, Anser erythropus, Anser brachyrhynchus, Anser cygnoides, Anser albifrons, Anser caerulescens, Anser anser, Anser sp., Anser indicus, Anser canagicus, Anser rossii
D	2		235784	BOLD:ACQ7220	6	4	4	29	33.3333	9231483	204.167	35.9974	204.167	100	SYS-CRLNONARTHINVERT	Annelida	Clitellata	Haplotaxida	Naididae	Tubificinae	Psammoryctides	Psammoryctides barbatus
D	2		235784	BOLD:AAC5002	6	5	5	13	16.6667	9231483	202.667	45.9794	202.667	99.5065	SYS-CRLNONINSECTARTH	Arthropoda	Branchiopoda	Anomopoda	Daphniidae		Daphnia	Daphnia laevis, Daphnia hyalina, Daphnia sp., Daphnia cucullata, Daphnia mendotae, Daphnia galeata
D	2		235784	BOLD:ACB2983	6	6	6	71	0	9231483	202.833	32.9541	202.833	99.7529	SYS-CRLINSECTA	Arthropoda	Insecta	Diptera	Chironomidae	Chironominae	Fleuria	Fleuria lacustris
D	2		235784	BOLD:AEB1117	6	2	2	71	66.6667	9231483	189	32.1915	189	97.2559	SYS-CRLINSECTA	Arthropoda	Insecta	Diptera	Chironomidae	Chironominae	Polypedilum	Polypedilum nubeculosum
D	2		235784	BOLD:AEC3341	6	5	5	71	16.6667	9231483	204.333	37.0304	204.333	97.7176	SYS-CRLINSECTA	Arthropoda	Insecta	Diptera	Ceratopogonidae	Ceratopogoninae	Probezzia
D	2		235784	BOLD:ADE0065	6	4	4	13	33.3333	9231483	191.5	48.8977	198.5	98.95	SYS-CRLNONINSECTARTH	Arthropoda	Ostracoda	Podocopida	Candonidae		Fabaeformiscandona	Fabaeformiscandona fabaeformis
D	2		235784	BOLD:ADG7137	8	7	7	28	12.5	9231483	204	36.8266	204	99.5714	SYS-CRLNONARTHINVERT	Annelida	Clitellata	Haplotaxida	Naididae	Tubificinae	Potamothrix	Potamothrix sp.
D	2		235784	BOLD:AAW5643	8	5	5	69	37.5	9231483	204	30.6383	204	99.6933	SYS-CRLINSECTA	Arthropoda	Insecta	Diptera	Chironomidae	Chironominae	Endochironomus	Endochironomus stackelbergi, Endochironomus tendens, Endochironomus albipennis
D	2		235784	BOLD:ACY3855	8	5	5	69	37.5	9231483	203.25	30.6954	203.25	99.5699	SYS-CRLINSECTA	Arthropoda	Insecta	Diptera	Chironomidae	Chironominae	Pentapedilum, Polypedilum	Polypedilum sordens, Pentapedilum sordens
D	2		235784	BOLD:ADJ7954	10	6	6	27	40	9231483	203.7	36.3795	203.7	97.9859	SYS-CRLNONARTHINVERT	Annelida	Clitellata	Haplotaxida	Naididae
D	2		235784	BOLD:AEA8657	10	4	4	67	60	9231483	204.4	33.8553	204.4	98.7281	SYS-CRLINSECTA	Arthropoda	Insecta	Diptera	Chironomidae	Chironominae	Polypedilum	Polypedilum nubeculosum
D	2		235784	BOLD:AAK5996	10	5	5	67	50	9231483	202.4	30.1929	202.4	99.7502	SYS-CRLINSECTA	Arthropoda	Insecta	Odonata	Libellulidae	Libellulinae	Orthetrum	Orthetrum cancellatum, Orthetrum albistylum
D	2		235784	BOLD:AAB0356	10	5	5	8	50	9231483	202.4	43.8405	202.4	100	SYS-CRLCHORDATA	Chordata	Actinopterygii	Perciformes	Percidae	Percinae	Perca	Perca fluviatilis
D	2		235784	BOLD:AAU2145	12	4	4	65	66.6667	9231483	203.083	33.6942	203.083	100	SYS-CRLINSECTA	Arthropoda	Insecta	Diptera	Chironomidae	Orthocladiinae	Cricotopus	Cricotopus intersectus
D	2		235784	BOLD:ADF0941	12	5	5	65	58.3333	9231483	202.583	35.2943	202.583	100	SYS-CRLINSECTA	Arthropoda	Insecta	Diptera	Chironomidae	Chironominae	Cryptochironomus	Cryptochironomus albofasciatus, Cryptochironomus supplicans
D	2		235784	BOLD:AAH0892	12	7	7	12	41.6667	9231483	204.25	38.2654	204.25	99.4683	SYS-CRLNONINSECTARTH	Arthropoda	Ostracoda	Podocopida	Cyprididae	Cypridopsinae	Cypridopsis	Cypridopsis vidua
D	2		235784	BOLD:AAU3868	14	7	7	26	50	9231483	201.643	37.7381	201.643	99.4406	SYS-CRLNONARTHINVERT	Annelida	Clitellata	Enchytraeida	Enchytraeidae		Enchytraeidaegen	Enchytraeidaegen cf. sp.
D	2		235784	BOLD:ACR9864	14	5	5	10	64.2857	9231483	203.286	32.2608	203.286	99.9646	SYS-CRLNONINSECTARTH	Arthropoda	Arachnida	Trombidiformes	Pionidae	Pioninae	Piona	Piona carnea
D	2		235784	BOLD:ACS0119	14	7	7	10	50	9231483	202.357	29.5864	202.357	98.6201	SYS-CRLNONINSECTARTH	Arthropoda	Arachnida	Trombidiformes	Aturidae	Axonopsinae	Brachypoda{mite_genus}	Brachypoda versicolor
D	2		235784	BOLD:AAI6827	14	12	12	64	14.2857	9231483	192.786	44.1869	192.786	99.6951	SYS-CRLINSECTA	Arthropoda	Insecta	Ephemeroptera	Caenidae	Caeninae	Caenis	Caenis horaria
D	2		235784	BOLD:AAA5988	14	7	7	7	50	9231483	201.357	42.0413	201.357	99.9259	SYS-CRLCHORDATA	Chordata	Actinopterygii	Esociformes	Esocidae		Esox	Esox lucius, Esox cisalpinus
D	2		235784	BOLD:AAW3990	16	5	5	63	68.75	9231483	203.188	35.659	203.188	99.9694	SYS-CRLINSECTA	Arthropoda	Insecta	Diptera	Chironomidae	Chironominae	Chironomus	Chironomus balatonicus, Chironomus cf. nudiventris, Chironomus plumosus
D	2		235784	BOLD:ABZ4910	18	7	7	9	61.1111	9231483	203.944	42.359	203.944	99.4816	SYS-CRLNONINSECTARTH	Arthropoda	Branchiopoda	Anomopoda	Daphniidae		Daphnia	Daphnia arenata, Daphnia cf. middendorffiana, Daphnia cf. pulex sp.2 NA, Daphnia cf. pulicaria sp. 2 NA, Simocephalus punctatus, Daphnia curvirostris, Daphnia melanica, Daphnia pulicaria, Daphnia middendorffiana, Daphnia cf. pulex sp.2NA
D	2		235784	BOLD:ADU2111	18	6	6	62	66.6667	9231483	198.222	34.7657	198.222	98.5295	SYS-CRLINSECTA	Arthropoda	Insecta	Diptera
D	2		235784	BOLD:ACD8415	19	9	9	61	52.6316	9231483	202.474	34.6222	202.474	99.8963	SYS-CRLINSECTA	Arthropoda	Insecta	Diptera	Chironomidae	Chironominae	Chironomus	Chironomus NHRS sp. B, Chironomus nuditarsis, Chironomus curabilis
D	2		235784	BOLD:ADC8854	20	11	11	6	45	9231483	201.55	46.09	201.55	99.2074	SYS-CRLCHORDATA	Chordata	Actinopterygii	Anguilliformes	Anguillidae		Anguilla	Anguilla anguilla, Anguilla rostrata
D	2		235784	BOLD:AAE5570	21	9	9	60	57.1429	9231483	199.905	34.7353	199.905	99.6499	SYS-CRLINSECTA	Arthropoda	Insecta	Odonata	Coenagrionidae	Ischnurinae	Ischnura	Ischnura sp., Ischnura saharensis, Ischnura elegans, Ischnura graellsii, Ischnura genei
D	2		235784	BOLD:ADL2119	22	6	6	59	72.7273	9231483	202.545	33.7081	202.545	99.9775	SYS-CRLINSECTA	Arthropoda	Insecta	Diptera	Chironomidae	Chironominae	Cryptochironomus	Cryptochironomus supplicans
D	2		235784	BOLD:ACB6519	24	12	12	24	50	9231483	204.167	35.3055	204.167	98.489	SYS-CRLNONARTHINVERT	Annelida	Clitellata	Haplotaxida	Naididae	Naidinae	Nais	Nais barbata
D	2		235784	BOLD:AAD0304	24	6	6	58	75	9231483	202.708	28.0168	202.708	99.9796	SYS-CRLINSECTA	Arthropoda	Insecta	Hymenoptera	Formicidae	Formicinae	Lasius	Lasius fuliginosus
D	2		235784	BOLD:AAD9208	24	11	11	24	54.1667	9231483	200.75	40.1473	201.75	99.4172	SYS-CRLNONARTHINVERT	Mollusca	Bivalvia	Unionida	Unionidae	Unioninae	Unio	Unio pictorum
D	2		235784	BOLD:ACQ7477	25	7	7	23	72	9231483	204.28	36.0901	204.28	99.9609	SYS-CRLNONARTHINVERT	Annelida	Clitellata	Haplotaxida	Naididae	Tubificinae	Potamothrix	Potamothrix heuscheri
D	2		235784	BOLD:ACP7778	25	6	6	56	76	9231483	198	27.5388	203.8	99.4141	SYS-CRLINSECTA	Arthropoda	Insecta	Diptera	Rhinophoridae		Phyto	Phyto melanocephala
D	2		235784	BOLD:ADT7895	25	7	7	56	72	9231483	202.88	33.6731	202.88	98.9765	SYS-CRLINSECTA	Arthropoda	Insecta	Diptera	Chaoboridae	Chaoborinae	Chaoborus	Chaoborus flavicans
D	2		235784	BOLD:AAC1523	25	16	16	5	36	9231483	193.16	52.1361	193.16	99.0503	SYS-CRLCHORDATA	Chordata	Aves	Anseriformes	Anatidae		Aythya	Aythya novaeseelandiae, Aythya marila, Aythya fuligula, Aythya affinis
D	2		235784	BOLD:AAE9024	27	8	8	55	70.3704	9231483	203.667	33.8456	203.667	99.7076	SYS-CRLINSECTA	Arthropoda	Insecta	Diptera	Chironomidae	Chironominae	Chironomus	Chironomus tentans, Chironomus pallidivittatus
D	2		235784	BOLD:ADW3730	29	13	13	54	55.1724	9231483	199.103	31.5311	199.103	99.6976	SYS-CRLINSECTA	Arthropoda	Insecta	Hemiptera	Cicadellidae
D	2		235784	BOLD:ACM1671	30	8	8	53	73.3333	9231483	201.167	31.8475	201.167	98.3598	SYS-CRLINSECTA	Arthropoda	Insecta	Diptera	Chironomidae	Chironominae	Tanytarsus
D	2		235784	BOLD:ACO8871	32	7	7	51	78.125	9231483	203	37.9201	203	98.9992	SYS-CRLINSECTA	Arthropoda	Insecta	Diptera	Chironomidae	Chironominae	Chironomus	Chironomus sp. PA15, Chironomus anthracinus
D	2		235784	BOLD:AAM7076	32	16	16	51	50	9231483	202.469	34.4378	202.469	99.8926	SYS-CRLINSECTA	Arthropoda	Insecta	Ephemeroptera	Baetidae	Baetinae	Cloeon	Cloeon dipterum
D	2		235784	BOLD:ADL1458	35	10	10	50	71.4286	9231483	200.314	31.9919	200.314	98.4627	SYS-CRLINSECTA	Arthropoda	Insecta	Diptera	Chironomidae	Orthocladiinae	Cricotopus	Cricotopus ornatus
D	2		235784	BOLD:ACS6392	36	10	10	49	72.2222	9231483	204	32.7335	204	99.9726	SYS-CRLINSECTA	Arthropoda	Insecta	Diptera	Chironomidae	Orthocladiinae	Cricotopus	Cricotopus intersectus
D	2		235784	BOLD:AAA6805	37	14	14	22	62.1622	9231483	203.838	37.8041	203.838	99.5483	SYS-CRLNONARTHINVERT	Annelida	Clitellata	Haplotaxida	Naididae	Tubificinae	Tubifex	Tubifex tubifex
D	2		235784	BOLD:ACZ8808	38	12	12	47	68.4211	9231483	202.184	35.4192	202.184	99.9101	SYS-CRLINSECTA	Arthropoda	Insecta	Diptera	Chironomidae	Chironominae	Cladotanytarsus	Cladotanytarsus bicornutus, Cladotanytarsus wexionensis
D	2		235784	BOLD:ADJ9286	38	9	9	47	76.3158	9231483	203.5	33.3754	203.5	99.9743	SYS-CRLINSECTA	Arthropoda	Insecta	Diptera	Chironomidae	Orthocladiinae	Nanocladius	Nanocladius dichromus
D	2		235784	BOLD:ABZ9874	40	20	20	8	50	9231483	202.9	40.3097	202.9	99.5935	SYS-CRLNONINSECTARTH	Arthropoda	Ostracoda	Podocopida	Candonidae		Pseudocandona	Pseudocandona compressa
D	2		235784	BOLD:ACQ7480	48	6	6	21	87.5	9231483	204.542	42.0981	204.542	97.0666	SYS-CRLNONARTHINVERT	Annelida	Clitellata	Haplotaxida	Naididae	Tubificinae	Potamothrix	Potamothrix bedoti
D	2		235784	BOLD:AAU2239	49	15	15	46	69.3878	9231483	203.082	35.1191	203.082	99.9198	SYS-CRLINSECTA	Arthropoda	Insecta	Diptera	Chironomidae	Chironominae	Cladotanytarsus, Chironomus	Chironomus tentans, Cladotanytarsus atridorsum, Chironomus plumosus, Chironomus usenicus
D	2		235784	BOLD:ACP9482	51	9	9	19	82.3529	9231483	203.235	33.0356	203.235	99.7412	SYS-CRLNONARTHINVERT	Annelida	Clitellata	Arhynchobdellida	Erpobdellidae	Erpobdellinae	Erpobdella	Erpobdella octoculata
D	2		235784	BOLD:ACB6471	51	10	10	19	80.3922	9231483	204.255	37.4096	204.255	97.5136	SYS-CRLNONARTHINVERT	Annelida	Clitellata	Haplotaxida	Naididae	Naidinae	Chaetogaster	Chaetogaster diastrophus
D	2		235784	BOLD:ACB0425	51	12	12	7	76.4706	9231483	202.706	39.0673	202.706	99.7179	SYS-CRLNONINSECTARTH	Arthropoda	Branchiopoda	Anomopoda	Chydoridae	Chydorinae	Chydorus	Chydorus sphaericus
D	2		235784	BOLD:ADR2107	53	13	13	18	75.4717	9231483	202.642	38.9056	202.642	98.7221	SYS-CRLNONARTHINVERT	Annelida	Clitellata	Haplotaxida	Naididae	Tubificinae	Limnodrilus	Limnodrilus udekemianus
D	2		235784	BOLD:ACX2014	53	9	9	45	83.0189	9231483	204.245	33.1372	204.245	97.6536	SYS-CRLINSECTA	Arthropoda	Insecta	Diptera	Chironomidae	Chironominae	Tanytarsus	Tanytarsus mendax
D	2		235784	BOLD:ACI0505	54	10	10	17	81.4815	9231483	202.111	31.057	202.111	97.5461	SYS-CRLNONARTHINVERT	Mollusca	Gastropoda		Lymnaeidae		Radix	Radix cf. auricularia, Radix sp. clade 1 CC-2016, Radix auricularia
D	2		235784	BOLD:ABV1930	55	19	19	15	65.4545	9231483	201.018	42.1791	202.473	99.8109	SYS-CRLNONARTHINVERT	Annelida	Clitellata	Haplotaxida	Naididae	Tubificinae	Limnodrilus	Limnodrilus hoffmeisteri, Limnodrilus hoffmeisteri X, Limnodrilus hoffmeisteri_X
D	2		235784	BOLD:ADZ9169	55	13	13	15	76.3636	9231483	201.018	40.9407	201.018	99.9638	SYS-CRLNONARTHINVERT	Annelida	Clitellata	Haplotaxida	Naididae	Tubificinae	Spirosperma	Spirosperma ferox
D	2		235784	BOLD:AAP9060	55	21	21	44	61.8182	9231483	203.291	32.3077	203.291	99.3367	SYS-CRLINSECTA	Arthropoda	Insecta	Diptera	Ceratopogonidae	Ceratopogoninae	Palpomyia	Palpomyia lineata
D	2		235784	BOLD:ADA8808	56	8	8	14	85.7143	9231483	204.304	40.5648	204.304	99.9465	SYS-CRLNONARTHINVERT	Annelida	Clitellata	Haplotaxida	Naididae	Tubificinae	Spirosperma	Spirosperma ferox
D	2		235784	BOLD:ACI1944	59	13	13	13	77.9661	9231483	203.034	39.1337	203.034	99.8996	SYS-CRLNONARTHINVERT	Annelida	Clitellata	Haplotaxida	Naididae	Tubificinae	Tubifex, Potamothrix	Potamothrix bavaricus, Tubifex tubifex
D	2		235784	BOLD:AAU1200	59	11	11	42	81.3559	9231483	203.153	29.9632	203.153	99.732	SYS-CRLINSECTA	Arthropoda	Insecta	Diptera	Chironomidae	Chironominae	Chironomus, Paratanytarsus	Chironomus plumosus, Paratanytarsus inopertus
D	2		235784	BOLD:ACX3166	59	22	22	42	62.7119	9231483	201.458	38.2069	201.458	99.6462	SYS-CRLINSECTA	Arthropoda	Insecta	Diptera	Ceratopogonidae	Ceratopogoninae	Probezzia	Probezzia seminigra
D	2		235784	BOLD:ACF7004	60	7	7	41	88.3333	9231483	202.083	33.6399	203.067	97.0808	SYS-CRLINSECTA	Arthropoda	Insecta	Thysanoptera	Thripidae	Thripinae	Limothrips	Limothrips denticornis
D	2		235784	BOLD:AAA3774	76	21	21	40	72.3684	9231483	203.184	34.3405	203.184	99.0215	SYS-CRLINSECTA	Arthropoda	Insecta	Diptera	Chironomidae	Chironominae	Tanytarsus	Tanytarsus mendax
D	2		235784	BOLD:AAD6712	79	26	26	12	67.0886	9231483	201.228	31.3457	203.291	99.7229	SYS-CRLNONARTHINVERT	Mollusca	Gastropoda		Lymnaeidae		Radix	Radix sp. MOTU 4, Radix sp., Radix auricularia, Radix sp. KIE1, Radix zue
D	2		235784	BOLD:ACW5385	84	22	22	39	73.8095	9231483	204.298	32.6611	204.298	99.8774	SYS-CRLINSECTA	Arthropoda	Insecta	Diptera	Chironomidae	Tanypodinae	Procladius	Procladius culiciformis, Procladius sagittalis, Procladius pectinatus
D	2		235784	BOLD:ADL1113	91	8	8	38	91.2088	9231483	201.868	33.6149	201.868	98.3724	SYS-CRLINSECTA	Arthropoda	Insecta	Diptera	Chironomidae	Chironominae	Polypedilum	Polypedilum nubeculosum
D	2		235784	BOLD:ABU8864	94	18	18	6	80.8511	9231483	203.723	39.9759	203.723	99.6981	SYS-CRLNONINSECTARTH	Arthropoda	Branchiopoda	Anomopoda	Daphniidae		Simocephalus	Simocephalus vetulus, Simocephalus exspinosus
D	2		235784	BOLD:AEB6123	95	21	21	11	77.8947	9231483	204.053	38.6643	204.053	99.9536	SYS-CRLNONARTHINVERT	Annelida	Clitellata	Haplotaxida	Naididae	Tubificinae	Tubifex	Tubifex tubifex
D	2		235784	BOLD:AAP7166	101	16	16	37	84.1584	9231483	204.03	30.4981	204.03	98.9035	SYS-CRLINSECTA	Arthropoda	Insecta	Diptera	Chironomidae	Chironominae	Tanytarsus	Tanytarsus usmaensis
D	2		235784	BOLD:ABX8802	103	23	23	35	77.6699	9231483	202.359	34.3014	202.379	99.7234	SYS-CRLINSECTA	Arthropoda	Insecta	Coleoptera	Dytiscidae	Laccophilinae	Laccophilus	Laccophilus hyalinus
D	2		235784	BOLD:ACN4387	103	19	19	35	81.5534	9231483	202.806	33.1532	202.806	98.9645	SYS-CRLINSECTA	Arthropoda	Insecta	Diptera	Chironomidae	Chironominae	Tanytarsus	Tanytarsus occultus, Tanytarsus cf. occultus
D	2		235784	BOLD:ACY8157	104	22	22	33	78.8462	9231483	202.846	32.2991	202.846	99.36	SYS-CRLINSECTA	Arthropoda	Insecta	Diptera	Chironomidae	Chironominae	Tanytarsus	Tanytarsus usmaensis
D	2		235784	BOLD:ADA4951	104	13	13	33	87.5	9231483	204.25	28.9557	204.25	99.9431	SYS-CRLINSECTA	Arthropoda	Insecta	Diptera	Chironomidae	Chironominae	Tanytarsus	Tanytarsus verralli
D	2		235784	BOLD:ACS0354	108	20	20	5	81.4815	9231483	202.231	32.6774	202.231	99.9481	SYS-CRLNONINSECTARTH	Arthropoda	Arachnida	Trombidiformes	Hydrodromidae		Hydrodroma	Hydrodroma despiciens
D	2		235784	BOLD:ACW0481	110	38	38	10	65.4545	9231483	199.718	39.7448	199.727	99.9177	SYS-CRLNONARTHINVERT	Annelida	Clitellata	Haplotaxida	Naididae	Tubificinae	Limnodrilus	Limnodrilus claparedianus, Limnodrilus claparedeanus
D	2		235784	BOLD:AEB2426	113	27	27	31	76.1062	9231483	204.071	34.3023	204.071	99.3579	SYS-CRLINSECTA	Arthropoda	Insecta	Diptera	Chironomidae	Chironominae	Polypedilum	Polypedilum nubeculosum
D	2		235784	BOLD:AAN1000	113	49	49	31	56.6372	9231483	202.611	46.5112	202.611	99.5867	SYS-CRLINSECTA	Arthropoda	Insecta	Ephemeroptera	Caenidae	Caeninae	Caenis	Caenis luctuosa
D	2		235784	BOLD:ACR8614	115	16	16	30	86.087	9231483	204.27	33.0161	204.27	99.9658	SYS-CRLINSECTA	Arthropoda	Insecta	Diptera	Chironomidae	Chironominae	Cladotanytarsus	Cladotanytarsus mancus sp. 2TE
D	2		235784	BOLD:AAV7098	116	25	25	29	78.4483	9231483	203.491	35.2904	203.491	99.5977	SYS-CRLINSECTA	Arthropoda	Insecta	Diptera	Chironomidae	Chironominae	Tanytarsus	Tanytarsus occultus, Tanytarsus NHRS sp. A
D	2		235784	BOLD:ACG9929	117	28	28	28	76.0684	9231483	202.786	33.8488	202.786	99.927	SYS-CRLINSECTA	Arthropoda	Insecta	Diptera	Chironomidae	Chironominae	Tanytarsus	Tanytarsus medius
D	2		235784	BOLD:ACB9673	123	29	29	27	76.4228	9231483	203.472	30.1626	203.472	97.8841	SYS-CRLINSECTA	Arthropoda	Insecta	Diptera	Chironomidae	Chironominae	Tanytarsus
D	2		235784	BOLD:AAA8100	133	46	46	3	65.4135	9231483	190.805	54.3003	190.805	99.6913	SYS-CRLCHORDATA	Chordata	Aves	Anseriformes	Anatidae		Tadorna, Anas	Anas fulvigula, Anas platyrhynchos x A. crecca, Anas poecilorhyncha, Anas platyrhynchos, Anas superciliosa, Anas laysanensis, Anas luzonica, Anas rubripes, Anas undulata, Tadorna tadorna
D	2		235784	BOLD:AAW4936	139	25	25	25	82.0144	9231483	202.079	35.0403	202.086	99.9223	SYS-CRLINSECTA	Arthropoda	Insecta	Diptera	Chironomidae	Chironominae	Cryptochironomus	Cryptochironomus obreptans, Cryptochironomus supplicans
D	2		235784	BOLD:ABZ6609	139	25	25	25	82.0144	9231483	202.518	36.5802	202.518	99.8962	SYS-CRLINSECTA	Arthropoda	Insecta	Diptera	Chironomidae	Chironominae	Dicrotendipes	Dicrotendipes pulsus, Dicrotendipes modestus
D	2		235784	BOLD:AAB6433	140	24	24	9	82.8571	9231483	201.729	33.2227	201.729	99.5158	SYS-CRLNONARTHINVERT	Mollusca	Gastropoda		Physidae		Physella	Physella acuta, Physella aff. acuta MOH16Phy1, Physella virgata, Physella gyrina, Physella anatina
D	2		235784	BOLD:AAD3373	159	46	46	2	71.0692	9231483	198.082	48.407	198.082	99.4432	SYS-CRLCHORDATA	Chordata	Aves	Gruiformes	Rallidae		Fulica	Fulica atra
D	2		235784	BOLD:AEB0319	164	15	15	24	90.8537	9231483	203.768	33.4309	203.768	99.0142	SYS-CRLINSECTA	Arthropoda	Insecta	Diptera	Chironomidae	Chironominae	Cladotanytarsus	Cladotanytarsus mancus
D	2		235784	BOLD:AAN7512	170	38	38	8	77.6471	9231483	201.088	39.7234	201.088	99.9488	SYS-CRLNONARTHINVERT	Annelida	Clitellata	Haplotaxida	Naididae
D	2		235784	BOLD:AEC3112	175	35	35	4	80	9231483	203.091	32.7636	203.103	98.5851	SYS-CRLNONINSECTARTH	Arthropoda	Arachnida	Trombidiformes	Unionicolidae	Pionatacinae	Neumania
D	2		235784	BOLD:AAB1238	199	44	44	7	77.8894	9231483	201.905	37.1652	201.905	99.9207	SYS-CRLNONARTHINVERT	Annelida	Clitellata	Lumbriculida	Lumbriculidae		Lumbriculus	Lumbriculus variegatus_I, Lumbriculus variegatus
D	2		235784	BOLD:AAV8406	216	44	44	23	79.6296	9231483	201.106	31.0894	201.111	98.2939	SYS-CRLINSECTA	Arthropoda	Insecta	Diptera	Chironomidae	Chironominae	Tanytarsus	Tanytarsus verralli
D	2		235784	BOLD:AAI9664	218	27	27	6	87.6147	9231483	202.917	35.6728	202.917	99.4732	SYS-CRLNONARTHINVERT	Annelida	Clitellata	Haplotaxida	Naididae	Naidinae	Dero	Dero digitata
D	2		235784	BOLD:AAK9986	241	56	56	22	76.7635	9231483	201.971	32.006	201.971	99.8661	SYS-CRLINSECTA	Arthropoda	Insecta	Diptera	Chironomidae	Orthocladiinae	Psectrocladius	Psectrocladius limbatellus, Psectrocladius sp. 4TE, Psectrocladius sordidellus
D	2		235784	BOLD:ACV8313	243	69	69	5	71.6049	9231483	200.28	45.6759	200.28	99.7898	SYS-CRLNONARTHINVERT	Annelida	Clitellata	Haplotaxida	Naididae	Rhyacodrilinae	Bothrioneurum	Bothrioneurum vejdovskyanum
D	2		235784	BOLD:AAF2659	245	41	41	3	83.2653	9231483	202.494	38.6111	202.494	99.2227	SYS-CRLNONINSECTARTH	Arthropoda	Branchiopoda	Anomopoda	Chydoridae	Chydorinae	Chydorus	Chydorus cf. sphaericus, Chydorus sphaericus, Chydorus Sphaericus
D	2		235784	BOLD:ACK5400	257	35	35	4	86.3813	9231483	203.171	39.4206	203.171	99.9714	SYS-CRLNONARTHINVERT	Annelida	Clitellata	Haplotaxida	Naididae	Tubificinae	Potamothrix	Potamothrix moldaviensis
D	2		235784	BOLD:AAF3606	260	49	49	3	81.1538	9231483	203.308	33.585	203.308	99.4811	SYS-CRLNONARTHINVERT	Annelida	Clitellata	Haplotaxida	Naididae	Naidinae	Stylaria	Stylaria lacustris
D	2		235784	BOLD:ADD6917	260	47	47	2	81.9231	9231483	202.942	36.3522	202.835	99.2189	SYS-CRLNONINSECTARTH	Arthropoda	Branchiopoda	Anomopoda	Eurycercidae		Eurycercus	Eurycercus lamellatus
D	2		235784	BOLD:ACR8610	267	41	41	21	84.6442	9231483	203.139	34.6946	203.15	99.673	SYS-CRLINSECTA	Arthropoda	Insecta	Diptera	Chironomidae	Chironominae	Cladotanytarsus	Cladotanytarsus mancus
D	2		235784	BOLD:ADF1572	285	49	49	20	82.807	9231483	202.446	36.2903	202.446	98.7056	SYS-CRLINSECTA	Arthropoda	Insecta	Diptera	Chironomidae	Chironominae	Chironomus	Chironomus plumosus
D	2		235784	BOLD:AAV9062	354	71	71	19	79.9435	9231483	202.314	30.7853	202.314	99.7161	SYS-CRLINSECTA	Arthropoda	Insecta	Diptera	Chironomidae	Orthocladiinae	Cricotopus	Cricotopus arcuatus, Cricotopus intersectus, Cricotopus laricomalis
D	2		235784	BOLD:ADF2204	356	54	54	18	84.8315	9231483	203.053	34.1512	203.053	99.5984	SYS-CRLINSECTA	Arthropoda	Insecta	Diptera	Chironomidae	Chironominae	Cladotanytarsus	Cladotanytarsus mancus
D	2		235784	BOLD:AAP5876	391	54	54	17	86.1893	9231483	203.018	32.4661	203.02	99.8953	SYS-CRLINSECTA	Arthropoda	Insecta	Diptera	Chironomidae	Chironominae	Tanytarsus	Tanytarsus telmaticus, Tanytarsus lestagei
D	2		235784	BOLD:AEB6122	468	79	79	2	83.1197	9231483	203.177	37.957	203.177	99.28	SYS-CRLNONARTHINVERT	Annelida	Clitellata	Haplotaxida	Naididae	Tubificinae	Tubifex	Tubifex tubifex
D	2		235784	BOLD:ADK1445	562	69	69	16	87.7224	9231483	203.068	30.8283	203.068	99.4001	SYS-CRLINSECTA	Arthropoda	Insecta	Diptera	Chironomidae	Chironominae	Tanytarsus	Tanytarsus verralli
D	2		235784	BOLD:ACB9674	789	87	87	14	88.9734	9231483	201.535	31.7092	201.53	99.895	SYS-CRLINSECTA	Arthropoda	Insecta	Diptera	Chironomidae	Chironominae	Tanytarsus	Tanytarsus verralli
D	2		235784	BOLD:AAK6479	858	123	123	13	85.6643	9231483	198.333	37.927	201.679	99.9435	SYS-CRLINSECTA	Arthropoda	Insecta	Hemiptera	Corixidae	Micronectinae	Micronecta	Micronecta scholtzi
D	2		235784	BOLD:ACV9616	967	160	160	1	83.454	9231483	202.281	39.0526	202.281	99.7988	SYS-CRLNONARTHINVERT	Annelida	Clitellata	Haplotaxida	Naididae	Tubificinae	Limnodrilus
D	2		235784	BOLD:AAM6003	972	131	131	12	86.5226	9231483	203.226	35.9447	203.226	99.8446	SYS-CRLINSECTA	Arthropoda	Insecta	Diptera	Chironomidae	Chironominae	Dicrotendipes	Dicrotendipes pulsus, Dicrotendipes modestus
D	2		235784	BOLD:AEB7724	984	120	120	11	87.8049	9231483	202.464	32.7646	202.464	99.4571	SYS-CRLINSECTA	Arthropoda	Insecta	Diptera	Ceratopogonidae	Ceratopogoninae	Culicoides	Culicoides duddingstoni
D	2		235784	BOLD:AAA5299	1157	144	144	10	87.554	9231483	203.444	32.5422	203.444	99.1491	SYS-CRLINSECTA	Arthropoda	Insecta	Diptera	Chironomidae	Orthocladiinae	Cricotopus	Cricotopus laetus, Cricotopus relucens, Cricotopus sp., Cricotopus sp. 3ES, Cricotopus sylvestris, Cricotopus glacialis
D	2		235784	BOLD:ADA4952	1188	140	140	9	88.2155	9231483	202.943	30.5438	202.943	99.6203	SYS-CRLINSECTA	Arthropoda	Insecta	Diptera	Chironomidae	Chironominae	Tanytarsus	Tanytarsus verralli
D	2		235784	BOLD:AAX2700	1447	204	204	8	85.9019	9231483	203.566	33.5936	203.567	98.9126	SYS-CRLINSECTA	Arthropoda	Insecta	Diptera	Chironomidae	Chironominae	Parachironomus	Parachironomus gracilior
D	2		235784	BOLD:AAG5527	1563	179	179	7	88.5477	9231483	202.713	30.9882	202.713	99.7118	SYS-CRLINSECTA	Arthropoda	Insecta	Diptera	Chironomidae	Tanypodinae	Procladius	Procladius rufovittatus
D	2		235784	BOLD:AAY3395	1581	271	271	6	82.859	9231483	202.494	33.1185	202.494	99.4157	SYS-CRLINSECTA	Arthropoda	Insecta	Diptera	Chironomidae	Chironominae	Polypedilum	Polypedilum nubeculosum
D	2		235784	BOLD:AAJ3263	1946	229	229	5	88.2323	9231483	203.115	35.3456	203.115	99.2106	SYS-CRLINSECTA	Arthropoda	Insecta	Diptera	Chironomidae	Chironominae	Cladotanytarsus	Cladotanytarsus atridorsum
D	2		235784	BOLD:AAQ0622	2154	257	257	4	88.0687	9231483	203.34	29.6749	203.339	99.3999	SYS-CRLINSECTA	Arthropoda	Insecta	Diptera	Chironomidae	Chironominae	Tanytarsus	Tanytarsus verralli
D	2		235784	BOLD:ABZ9053	2341	323	323	1	86.2025	9231483	202.702	38.6935	202.701	98.7071	SYS-CRLNONINSECTARTH	Arthropoda	Ostracoda	Podocopida	Limnocytheridae		Limnocythere	Limnocythere inopinata
D	2		235784	BOLD:AAA7175	3228	467	467	1	85.5328	9231483	195.642	46.0612	195.641	99.4972	SYS-CRLCHORDATA	Chordata	Actinopterygii	Cypriniformes	Cyprinidae	Cyprininae	Cyprinus	Cyprinus rubrofuscus, Procypris mera, Cyprinus carpio x Procypris rabaudi, Carassius auratus, Cyprinus intha, Cyprinus acutidorsalis, Cyprinus carpio Furong x Carassius auratus red var., Cyprinus carpio wuyuanensis x Carassius auratus, Cyprinus carpio, Cyprinus multitaeniata, Cyprinus megalophthalmus, Cyprinus carpio specularis x Carassius cuvieri, Cyprinus pellegrini, Labeo calbasu
D	2		235784	BOLD:ACD4470	4059	447	447	3	88.9874	9231483	202.491	35.9125	202.492	99.8733	SYS-CRLINSECTA	Arthropoda	Insecta	Diptera	Chironomidae	Chironominae	Glyptotendipes	Glyptotendipes glacus, Glyptotendipes pallens, Glyptotendipes nr. paripes
D	2		235784	BOLD:ACB8413	7964	910	910	2	88.5736	9231483	203.087	34.936	203.087	99.7533	SYS-CRLINSECTA	Arthropoda	Insecta	Diptera	Chaoboridae	Chaoborinae	Chaoborus	Chaoborus flavicans
D	2		235784	BOLD:AEC3568	43796	3843	3843	1	91.2252	9231483	203.244	32.4322	203.246	99.6895	SYS-CRLINSECTA	Arthropoda	Insecta	Diptera	Chironomidae	Orthocladiinae	Cricotopus	Cricotopus intersectus, Cricotopus laricomalis
D	3		20556	BOLD:ACQ7220	4	4	4	13	0	833741	204	36.2692	204	99.633	SYS-CRLNONARTHINVERT	Annelida	Clitellata	Haplotaxida	Naididae	Tubificinae	Psammoryctides	Psammoryctides barbatus
D	3		20556	BOLD:AAA8933	4	2	2	38	50	833741	204	29.6612	204	99.7561	SYS-CRLINSECTA	Arthropoda	Insecta	Coleoptera	Coccinellidae	Coccinellinae	Curinus, Coccinella	Curinus coeruleus, Coccinella septempunctata
D	3		20556	BOLD:AAP7166	4	2	2	38	50	833741	202.75	30.3314	202.75	99.0135	SYS-CRLINSECTA	Arthropoda	Insecta	Diptera	Chironomidae	Chironominae	Tanytarsus	Tanytarsus usmaensis
D	3		20556	BOLD:AAP9051	4	2	2	38	50	833741	204.5	35.0853	204.5	100	SYS-CRLINSECTA	Arthropoda	Insecta	Diptera	Ceratopogonidae	Ceratopogoninae	Culicoides	Culicoides pallidulus, Culicoides circumscriptus, Culicoides salinarius, Culicoides manchuriensis
D	3		20556	BOLD:AAW5643	4	2	2	38	50	833741	204.5	30.3192	204.5	100	SYS-CRLINSECTA	Arthropoda	Insecta	Diptera	Chironomidae	Chironominae	Endochironomus	Endochironomus stackelbergi, Endochironomus tendens, Endochironomus albipennis
D	3		20556	BOLD:ACY8157	4	2	2	38	50	833741	203	32.5147	203	99.5074	SYS-CRLINSECTA	Arthropoda	Insecta	Diptera	Chironomidae	Chironominae	Tanytarsus	Tanytarsus usmaensis
D	3		20556	BOLD:ADS6479	4	2	2	38	50	833741	204.75	36.1418	204.75	100	SYS-CRLINSECTA	Arthropoda	Insecta	Diptera	Ceratopogonidae	Ceratopogoninae	Culicoides	Culicoides salinarius
D	3		20556	BOLD:AAN1000	4	3	3	38	25	833741	202.25	46.7298	202.25	99.5055	SYS-CRLINSECTA	Arthropoda	Insecta	Ephemeroptera	Caenidae	Caeninae	Caenis	Caenis luctuosa
D	3		20556	BOLD:AEC2770	4	4	4	38	0	833741	148.75	46.2225	148.75	97.8088	SYS-CRLINSECTA	Arthropoda	Insecta	Lepidoptera	Sphingidae	Macroglossinae	Perigonia	Perigonia lusca
D	3		20556	BOLD:ABZ9874	4	2	2	7	50	833741	204.5	40.3431	204.5	100	SYS-CRLNONINSECTARTH	Arthropoda	Ostracoda	Podocopida	Candonidae		Pseudocandona	Pseudocandona compressa
D	3		20556	BOLD:AAM0091	4	3	3	6	25	833741	203	39.6522	203	100	SYS-CRLCHORDATA	Chordata	Amphibia	Anura	Ranidae		Pelophylax	Pelophylax kurtmuelleri, Pelophylax esculentus, Pelophylax lessonae, Pelophylax ridibundus, Pelophylax sp.
D	3		20556	BOLD:AAD9208	4	3	3	13	25	833741	201	40.0975	202	99.5024	SYS-CRLNONARTHINVERT	Mollusca	Bivalvia	Unionida	Unionidae	Unioninae	Unio	Unio pictorum
D	3		20556	BOLD:ACI0505	4	2	2	13	50	833741	202.75	31.196	202.75	97.6558	SYS-CRLNONARTHINVERT	Mollusca	Gastropoda		Lymnaeidae		Radix	Radix cf. auricularia, Radix sp. clade 1 CC-2016, Radix auricularia
D	3		20556	BOLD:ADJ7242	5	5	5	12	0	833741	203.8	36.8005	203.8	100	SYS-CRLNONARTHINVERT	Annelida	Clitellata	Haplotaxida	Naididae	Tubificinae	Limnodrilus	Limnodrilus claparedianus
D	3		20556	BOLD:ACX7742	5	4	4	6	20	833741	202.6	45.1142	202.6	99.6054	SYS-CRLNONINSECTARTH	Arthropoda	Collembola	Entomobryomorpha	Isotomidae		Isotomurus	Isotomurus palustris
D	3		20556	BOLD:AAE5234	6	5	5	5	16.6667	833741	204.833	30.4312	204.833	99.7561	SYS-CRLNONINSECTARTH	Arthropoda	Arachnida	Araneae	Linyphiidae		Agyneta	Agyneta jacksoni, Agyneta rurestris, Agyneta alpica, Agyneta pseudorurestris, Agyneta subtilis, Agyneta nigripes, Agyneta ressli, Agyneta similis
D	3		20556	BOLD:AAJ4282	6	6	6	31	0	833741	204	34.5587	204	99.8366	SYS-CRLINSECTA	Arthropoda	Insecta	Diptera	Chironomidae	Chironominae	Chironomus	Chironomus nr. riparius, Chironomus cf. aprilinus, Chironomus nr. pseudothummi, Chironomus luridus
D	3		20556	BOLD:AAU4046	6	6	6	31	0	833741	202.833	36.6453	202.833	99.6707	SYS-CRLINSECTA	Arthropoda	Insecta	Diptera	Chironomidae	Chironominae	Chironomus	Chironomus melanotus, Chironomus annularius
D	3		20556	BOLD:AAZ4292	6	4	4	31	33.3333	833741	203.667	30.7707	203.667	99.9187	SYS-CRLINSECTA	Arthropoda	Insecta	Diptera	Limoniidae	Chioneinae	Symplecta	Symplecta cf. hybrida, Symplecta hybrida
D	3		20556	BOLD:ABZ6609	6	3	3	31	50	833741	204.167	36.5714	204.167	100	SYS-CRLINSECTA	Arthropoda	Insecta	Diptera	Chironomidae	Chironominae	Dicrotendipes	Dicrotendipes pulsus, Dicrotendipes modestus
D	3		20556	BOLD:ADF1572	6	6	6	31	0	833741	201.833	36.4267	201.833	98.6758	SYS-CRLINSECTA	Arthropoda	Insecta	Diptera	Chironomidae	Chironominae	Chironomus	Chironomus plumosus
D	3		20556	BOLD:ADK1445	6	3	3	31	50	833741	203.333	30.7472	203.333	99.7525	SYS-CRLINSECTA	Arthropoda	Insecta	Diptera	Chironomidae	Chironominae	Tanytarsus	Tanytarsus verralli
D	3		20556	BOLD:AAK6479	6	5	5	31	16.6667	833741	198.667	38.1451	202.333	100	SYS-CRLINSECTA	Arthropoda	Insecta	Hemiptera	Corixidae	Micronectinae	Micronecta	Micronecta scholtzi
D	3		20556	BOLD:ACS9288	6	3	3	11	50	833741	183.667	46.7893	201.667	99.7561	SYS-CRLNONARTHINVERT	Mollusca	Bivalvia	Cardiida, Galeommatida	Lasaeidae, Cardiidae	Montacutinae, Lymnocardiinae	Mysella, Cerastoderma	Cerastoderma glaucum, Mysella bidentata
D	3		20556	BOLD:ACK5110	8	4	4	10	50	833741	204.375	39.204	204.375	99.6948	SYS-CRLNONARTHINVERT	Annelida	Clitellata	Haplotaxida	Naididae	Tubificinae	Potamothrix	Potamothrix moldaviensis
D	3		20556	BOLD:ADC8854	8	4	4	5	50	833741	202.25	45.4932	202.25	99.7534	SYS-CRLCHORDATA	Chordata	Actinopterygii	Anguilliformes	Anguillidae		Anguilla	Anguilla anguilla, Anguilla rostrata
D	3		20556	BOLD:AAA3774	9	8	8	30	11.1111	833741	203.556	33.7379	203.556	99.6737	SYS-CRLINSECTA	Arthropoda	Insecta	Diptera	Chironomidae	Chironominae	Tanytarsus	Tanytarsus mendax
D	3		20556	BOLD:AAL1506	10	6	6	8	40	833741	202.7	35.0277	202.7	99.9015	SYS-CRLNONARTHINVERT	Annelida	Clitellata	Haplotaxida	Naididae	Naidinae	Dero	Dero sp. 1 AEB-2009, Dero sp. Jemmerson Slough-AEB-2002
D	3		20556	BOLD:AAN7512	10	7	7	8	30	833741	192.7	40.2398	192.7	99.9507	SYS-CRLNONARTHINVERT	Annelida	Clitellata	Haplotaxida	Naididae
D	3		20556	BOLD:AEC3112	10	4	4	4	60	833741	203.3	33.0022	203.4	98.5243	SYS-CRLNONINSECTARTH	Arthropoda	Arachnida	Trombidiformes	Unionicolidae	Pionatacinae	Neumania
D	3		20556	BOLD:AAU0273	10	4	4	27	60	833741	203.4	35.3506	203.4	98.0833	SYS-CRLINSECTA	Arthropoda	Insecta	Diptera	Chironomidae	Orthocladiinae	Psectrocladius	Psectrocladius limbatellus, Psectrocladius ventricosus
D	3		20556	BOLD:ADA9053	10	7	7	27	30	833741	198.9	36.194	198.9	98.9905	SYS-CRLINSECTA	Arthropoda	Insecta	Diptera	Chironomidae	Chironominae	Glyptotendipes	Glyptotendipes paripes
D	3		20556	BOLD:ADF2204	10	4	4	27	60	833741	204.2	34.1833	204.2	99.7556	SYS-CRLINSECTA	Arthropoda	Insecta	Diptera	Chironomidae	Chironominae	Cladotanytarsus	Cladotanytarsus mancus
D	3		20556	BOLD:ABZ5549	11	3	3	26	72.7273	833741	203.909	37.2734	203.909	99.5096	SYS-CRLINSECTA	Arthropoda	Insecta	Diptera	Chironomidae	Orthocladiinae	Psectrocladius	Psectrocladius limbatellus, Psectrocladius ventricosus
D	3		20556	BOLD:AAA8488	11	5	5	4	54.5455	833741	194.545	47.5908	194.545	100	SYS-CRLCHORDATA	Chordata	Actinopterygii	Scorpaeniformes	Gasterosteidae		Gasterosteus	Gasterosteus gymnurus, Gasterosteus sp., Gasterosteus islandicus, Gasterosteus aculeatus
D	3		20556	BOLD:ACK3819	12	8	8	25	33.3333	833741	202.167	33.1408	202.167	99.2993	SYS-CRLINSECTA	Arthropoda	Insecta	Diptera	Chironomidae	Tanypodinae	Psectrotanypus	Psectrotanypus varius
D	3		20556	BOLD:ADL1113	14	6	6	24	57.1429	833741	198.643	33.5918	198.643	98.2179	SYS-CRLINSECTA	Arthropoda	Insecta	Diptera	Chironomidae	Chironominae	Polypedilum	Polypedilum nubeculosum
D	3		20556	BOLD:ACR8610	15	6	6	21	60	833741	203.4	34.4497	203.4	99.8693	SYS-CRLINSECTA	Arthropoda	Insecta	Diptera	Chironomidae	Chironominae	Cladotanytarsus	Cladotanytarsus mancus
D	3		20556	BOLD:ACR8614	15	3	3	21	80	833741	204	32.941	204	100	SYS-CRLINSECTA	Arthropoda	Insecta	Diptera	Chironomidae	Chironominae	Cladotanytarsus	Cladotanytarsus mancus sp. 2TE
D	3		20556	BOLD:ADA4951	15	5	5	21	66.6667	833741	204.333	29.0095	204.333	99.8359	SYS-CRLINSECTA	Arthropoda	Insecta	Diptera	Chironomidae	Chironominae	Tanytarsus	Tanytarsus verralli
D	3		20556	BOLD:AEB6123	16	7	7	6	56.25	833741	204.125	38.6099	204.125	99.9387	SYS-CRLNONARTHINVERT	Annelida	Clitellata	Haplotaxida	Naididae	Tubificinae	Tubifex	Tubifex tubifex
D	3		20556	BOLD:AAD6712	16	11	11	6	31.25	833741	193.312	31.7033	197.062	99.7606	SYS-CRLNONARTHINVERT	Mollusca	Gastropoda		Lymnaeidae		Radix	Radix sp. MOTU 4, Radix sp., Radix auricularia, Radix sp. KIE1, Radix zue
D	3		20556	BOLD:ADJ7243	17	7	7	5	58.8235	833741	202.176	38.0043	202.235	100	SYS-CRLNONARTHINVERT	Annelida	Clitellata	Haplotaxida	Naididae	Tubificinae	Limnodrilus	Limnodrilus claparedianus
D	3		20556	BOLD:AAV8406	17	4	4	18	76.4706	833741	202	31.6249	202	98.5149	SYS-CRLINSECTA	Arthropoda	Insecta	Diptera	Chironomidae	Chironominae	Tanytarsus	Tanytarsus verralli
D	3		20556	BOLD:ACP6608	17	8	8	18	52.9412	833741	172.353	32.7367	202.882	98.2902	SYS-CRLINSECTA	Arthropoda	Insecta	Diptera	Chironomidae	Tanypodinae	Tanypus	Tanypus kraatzi
D	3		20556	BOLD:AEB2426	17	11	11	18	35.2941	833741	203.765	33.977	203.765	99.1901	SYS-CRLINSECTA	Arthropoda	Insecta	Diptera	Chironomidae	Chironominae	Polypedilum	Polypedilum nubeculosum
D	3		20556	BOLD:AEB6122	20	4	4	4	80	833741	204.25	37.65	204.25	100	SYS-CRLNONARTHINVERT	Annelida	Clitellata	Haplotaxida	Naididae	Tubificinae	Tubifex	Tubifex tubifex
D	3		20556	BOLD:AAM6003	22	11	11	17	50	833741	199.955	36.0418	199.955	99.7515	SYS-CRLINSECTA	Arthropoda	Insecta	Diptera	Chironomidae	Chironominae	Dicrotendipes	Dicrotendipes pulsus, Dicrotendipes modestus
D	3		20556	BOLD:ACW5385	24	12	12	16	50	833741	203.958	32.2362	203.958	99.939	SYS-CRLINSECTA	Arthropoda	Insecta	Diptera	Chironomidae	Tanypodinae	Procladius	Procladius culiciformis, Procladius sagittalis, Procladius pectinatus
D	3		20556	BOLD:ACM0527	28	7	7	3	75	833741	203.393	31.875	203.393	98.5607	SYS-CRLNONINSECTARTH	Arthropoda	Arachnida	Trombidiformes	Pionidae
D	3		20556	BOLD:ADA4952	35	9	9	15	74.2857	833741	203.257	30.6028	203.257	99.564	SYS-CRLINSECTA	Arthropoda	Insecta	Diptera	Chironomidae	Chironominae	Tanytarsus	Tanytarsus verralli
D	3		20556	BOLD:ACB9674	38	9	9	13	76.3158	833741	201.947	31.7959	201.947	99.8567	SYS-CRLINSECTA	Arthropoda	Insecta	Diptera	Chironomidae	Chironominae	Tanytarsus	Tanytarsus verralli
D	3		20556	BOLD:ADD6917	39	14	14	2	64.1026	833741	203.769	36.2614	203.667	99.2312	SYS-CRLNONINSECTARTH	Arthropoda	Branchiopoda	Anomopoda	Eurycercidae		Eurycercus	Eurycercus lamellatus
D	3		20556	BOLD:AAV9062	40	15	15	12	62.5	833741	203	30.6585	203	99.617	SYS-CRLINSECTA	Arthropoda	Insecta	Diptera	Chironomidae	Orthocladiinae	Cricotopus	Cricotopus arcuatus, Cricotopus intersectus, Cricotopus laricomalis
D	3		20556	BOLD:ACK5400	57	14	14	3	75.4386	833741	203.895	39.3455	203.895	99.948	SYS-CRLNONARTHINVERT	Annelida	Clitellata	Haplotaxida	Naididae	Tubificinae	Potamothrix	Potamothrix moldaviensis
D	3		20556	BOLD:AAJ3263	60	18	18	11	70	833741	201.733	35.4185	201.733	99.2687	SYS-CRLINSECTA	Arthropoda	Insecta	Diptera	Chironomidae	Chironominae	Cladotanytarsus	Cladotanytarsus atridorsum
D	3		20556	BOLD:ACV8313	62	26	26	2	58.0645	833741	197.935	45.8806	197.935	99.9009	SYS-CRLNONARTHINVERT	Annelida	Clitellata	Haplotaxida	Naididae	Rhyacodrilinae	Bothrioneurum	Bothrioneurum vejdovskyanum
D	3		20556	BOLD:AAY3395	62	22	22	10	64.5161	833741	202.29	33.1536	202.29	99.363	SYS-CRLINSECTA	Arthropoda	Insecta	Diptera	Chironomidae	Chironominae	Polypedilum	Polypedilum nubeculosum
D	3		20556	BOLD:AAX2700	71	17	17	9	76.0563	833741	202.38	33.6597	202.38	98.9468	SYS-CRLINSECTA	Arthropoda	Insecta	Diptera	Chironomidae	Chironominae	Parachironomus	Parachironomus gracilior
D	3		20556	BOLD:AAA5299	84	24	24	8	71.4286	833741	203.881	32.3912	203.881	99.6733	SYS-CRLINSECTA	Arthropoda	Insecta	Diptera	Chironomidae	Orthocladiinae	Cricotopus	Cricotopus laetus, Cricotopus relucens, Cricotopus sp., Cricotopus sp. 3ES, Cricotopus sylvestris, Cricotopus glacialis
D	3		20556	BOLD:AAQ0622	104	34	34	7	67.3077	833741	203.702	29.6437	203.702	99.4529	SYS-CRLINSECTA	Arthropoda	Insecta	Diptera	Chironomidae	Chironominae	Tanytarsus	Tanytarsus verralli
D	3		20556	BOLD:ACV9616	123	39	39	1	68.2927	833741	201.512	39.0871	201.512	99.7124	SYS-CRLNONARTHINVERT	Annelida	Clitellata	Haplotaxida	Naididae	Tubificinae	Limnodrilus
D	3		20556	BOLD:ACX3166	142	36	36	6	74.6479	833741	203.542	37.9558	203.542	99.74	SYS-CRLINSECTA	Arthropoda	Insecta	Diptera	Ceratopogonidae	Ceratopogoninae	Probezzia	Probezzia seminigra
D	3		20556	BOLD:AAA8100	145	58	58	2	60	833741	193.628	54.1414	193.628	99.6118	SYS-CRLCHORDATA	Chordata	Aves	Anseriformes	Anatidae		Tadorna, Anas	Anas fulvigula, Anas platyrhynchos x A. crecca, Anas poecilorhyncha, Anas platyrhynchos, Anas superciliosa, Anas laysanensis, Anas luzonica, Anas rubripes, Anas undulata, Tadorna tadorna
D	3		20556	BOLD:AAW4936	175	22	22	5	87.4286	833741	202.24	35.0026	202.24	99.9575	SYS-CRLINSECTA	Arthropoda	Insecta	Diptera	Chironomidae	Chironominae	Cryptochironomus	Cryptochironomus obreptans, Cryptochironomus supplicans
D	3		20556	BOLD:AAG5527	200	33	33	4	83.5	833741	203.195	30.9468	203.195	99.5928	SYS-CRLINSECTA	Arthropoda	Insecta	Diptera	Chironomidae	Tanypodinae	Procladius	Procladius rufovittatus
D	3		20556	BOLD:AAA7175	261	73	73	1	72.0307	833741	194.536	46.0874	194.536	99.5073	SYS-CRLCHORDATA	Chordata	Actinopterygii	Cypriniformes	Cyprinidae	Cyprininae	Cyprinus	Cyprinus rubrofuscus, Procypris mera, Cyprinus carpio x Procypris rabaudi, Carassius auratus, Cyprinus intha, Cyprinus acutidorsalis, Cyprinus carpio Furong x Carassius auratus red var., Cyprinus carpio wuyuanensis x Carassius auratus, Cyprinus carpio, Cyprinus multitaeniata, Cyprinus megalophthalmus, Cyprinus carpio specularis x Carassius cuvieri, Cyprinus pellegrini, Labeo calbasu
D	3		20556	BOLD:ABZ9053	309	64	64	1	79.288	833741	202.628	38.7728	202.628	98.8787	SYS-CRLNONINSECTARTH	Arthropoda	Ostracoda	Podocopida	Limnocytheridae		Limnocythere	Limnocythere inopinata
D	3		20556	BOLD:ACD4470	441	76	76	3	82.7664	833741	202.354	35.9115	202.358	99.8747	SYS-CRLINSECTA	Arthropoda	Insecta	Diptera	Chironomidae	Chironominae	Glyptotendipes	Glyptotendipes glacus, Glyptotendipes pallens, Glyptotendipes nr. paripes
D	3		20556	BOLD:ACB8413	530	113	113	2	78.6792	833741	202.447	35.0064	202.447	99.7474	SYS-CRLINSECTA	Arthropoda	Insecta	Diptera	Chaoboridae	Chaoborinae	Chaoborus	Chaoborus flavicans
D	3		20556	BOLD:AEC3568	2316	393	393	1	83.0311	833741	203.074	32.4277	203.079	99.6873	SYS-CRLINSECTA	Arthropoda	Insecta	Diptera	Chironomidae	Orthocladiinae	Cricotopus	Cricotopus intersectus, Cricotopus laricomalis
D	1a		243710	BOLD:ACT6966	3	3	3	71	0	10268900	203	36.9476	203	99.5074	SYS-CRLINSECTA	Arthropoda	Insecta	Diptera	Chironomidae	Chironominae	Chironomus	Chironomus obtusidens
D	1a		243710	BOLD:ADK6135	3	3	3	71	0	10268900	170	32.4348	170	99.8127	SYS-CRLINSECTA	Arthropoda	Insecta	Diptera	Chironomidae	Chironominae	Cladotanytarsus	Cladotanytarsus mancus
D	1a		243710	BOLD:ACS0357	4	4	4	23	0	10268900	204.25	32.8043	204.25	99.7543	SYS-CRLNONINSECTARTH	Arthropoda	Arachnida	Trombidiformes	Pionidae	Pioninae	Piona	Piona pusilla
D	1a		243710	BOLD:ADE9664	4	4	4	70	0	10268900	201.75	33.8297	201.75	99.5043	SYS-CRLINSECTA	Arthropoda	Insecta	Diptera	Chironomidae	Chironominae	Cryptochironomus	Cryptochironomus obreptans, Cryptochironomus albofasciatus
D	1a		243710	BOLD:ABZ4910	5	4	4	22	20	10268900	203.4	42.9629	203.4	99.4059	SYS-CRLNONINSECTARTH	Arthropoda	Branchiopoda	Anomopoda	Daphniidae		Daphnia	Daphnia arenata, Daphnia cf. middendorffiana, Daphnia cf. pulex sp.2 NA, Daphnia cf. pulicaria sp. 2 NA, Simocephalus punctatus, Daphnia curvirostris, Daphnia melanica, Daphnia pulicaria, Daphnia middendorffiana, Daphnia cf. pulex sp.2NA
D	1a		243710	BOLD:AAB4581	5	4	4	68	20	10268900	203.8	36.0172	203.8	98.921	SYS-CRLINSECTA	Arthropoda	Insecta	Diptera	Chironomidae	Chironominae	Chironomus	Chironomus lugubris, Chironomus sp. TE11
D	1a		243710	BOLD:ADS0374	5	4	4	68	20	10268900	204	36.0785	204	98.1362	SYS-CRLINSECTA	Arthropoda	Insecta	Diptera	Chironomidae	Chironominae	Tanytarsus	Tanytarsus occultus
D	1a		243710	BOLD:AAM2090	5	3	3	31	40	10268900	203.2	28.408	204.2	99.7039	SYS-CRLNONARTHINVERT	Rotifera	Bdelloidea	Bdelloidea_order_incertae_sedis	Philodinidae		Philodina	Philodina citrina
D	1a		243710	BOLD:AAF7607	6	2	2	28	66.6667	10268900	204.5	36.4299	204.5	99.7549	SYS-CRLNONARTHINVERT	Annelida	Clitellata	Haplotaxida	Naididae	Naidinae	Nais	Nais variabilis, Nais communis, Nais christinae
D	1a		243710	BOLD:ABA8326	6	4	4	28	33.3333	10268900	201	38.1181	201	100	SYS-CRLNONARTHINVERT	Annelida	Clitellata	Haplotaxida	Sparganophilidae		Sparganophilus
D	1a		243710	BOLD:AAC5002	6	5	5	21	16.6667	10268900	203.667	44.9295	203.667	99.4272	SYS-CRLNONINSECTARTH	Arthropoda	Branchiopoda	Anomopoda	Daphniidae		Daphnia	Daphnia laevis, Daphnia hyalina, Daphnia sp., Daphnia cucullata, Daphnia mendotae, Daphnia galeata
D	1a		243710	BOLD:ACX3165	6	4	4	65	33.3333	10268900	202.333	37.2378	202.333	99.7532	SYS-CRLINSECTA	Arthropoda	Insecta	Diptera	Ceratopogonidae	Ceratopogoninae	Probezzia	Probezzia seminigra
D	1a		243710	BOLD:ADA6259	6	4	4	65	33.3333	10268900	203.833	32.7873	203.833	99.0188	SYS-CRLINSECTA	Arthropoda	Insecta	Diptera	Chironomidae	Orthocladiinae	Cricotopus	Cricotopus intersectus
D	1a		243710	BOLD:AEB1117	6	2	2	65	66.6667	10268900	190.667	32.2878	190.667	97.1516	SYS-CRLINSECTA	Arthropoda	Insecta	Diptera	Chironomidae	Chironominae	Polypedilum	Polypedilum nubeculosum
D	1a		243710	BOLD:AAI8740	6	4	4	28	33.3333	10268900	202.833	31.3897	202.833	99.2598	SYS-CRLNONARTHINVERT	Cnidaria	Hydrozoa	Anthoathecata	Hydridae		Hydra	Hydra sp., Hydra oligactis
D	1a		243710	BOLD:AAW1777	7	7	7	20	0	10268900	202	34.529	203.571	99.2213	SYS-CRLNONINSECTARTH	Arthropoda	Branchiopoda	Anomopoda	Chydoridae	Aloninae	Alona	Alona rectangula
D	1a		243710	BOLD:ADL2119	7	3	3	63	57.1429	10268900	202.857	33.7348	202.857	100	SYS-CRLINSECTA	Arthropoda	Insecta	Diptera	Chironomidae	Chironominae	Cryptochironomus	Cryptochironomus supplicans
D	1a		243710	BOLD:AEA8657	7	3	3	63	57.1429	10268900	204.571	33.7996	204.571	98.6739	SYS-CRLINSECTA	Arthropoda	Insecta	Diptera	Chironomidae	Chironominae	Polypedilum	Polypedilum nubeculosum
D	1a		243710	BOLD:ADU2111	8	5	5	61	37.5	10268900	202.875	33.9534	202.875	98.5242	SYS-CRLINSECTA	Arthropoda	Insecta	Diptera
D	1a		243710	BOLD:AAC8993	8	2	2	61	75	10268900	197.5	29.4929	203.5	100	SYS-CRLINSECTA	Arthropoda	Insecta	Trichoptera	Ecnomidae		Ecnomus	Ecnomus yamashironis, Ecnomus tenellus, Ecnomus sp. GM3
D	1a		243710	BOLD:AAX0441	10	4	4	27	60	10268900	204.7	35.1736	204.7	100	SYS-CRLNONARTHINVERT	Annelida	Clitellata	Haplotaxida	Naididae	Naidinae	Ophidonais	Ophidonais serpentina
D	1a		243710	BOLD:AAA7350	10	4	4	8	60	10268900	204.2	42.0686	204.2	100	SYS-CRLCHORDATA	Chordata	Actinopterygii	Cypriniformes	Cyprinidae	Tincinae	Tinca	Tinca tinca
D	1a		243710	BOLD:ACB6480	11	5	5	26	54.5455	10268900	199	37.3291	199	99.6724	SYS-CRLNONARTHINVERT	Annelida	Clitellata	Haplotaxida	Naididae	Naidinae	Nais
D	1a		243710	BOLD:AAC4105	12	7	7	7	41.6667	10268900	181.75	54.4372	181.75	99.9098	SYS-CRLCHORDATA	Chordata	Aves	Anseriformes	Anatidae		Mareca	Mareca strepera, Mareca falcata
D	1a		243710	BOLD:AAB6433	12	5	5	25	58.3333	10268900	197.333	33.5326	197.333	99.57	SYS-CRLNONARTHINVERT	Mollusca	Gastropoda		Physidae		Physella	Physella acuta, Physella aff. acuta MOH16Phy1, Physella virgata, Physella gyrina, Physella anatina
D	1a		243710	BOLD:ADD6293	13	6	6	19	53.8462	10268900	203.923	40.9359	203.923	98.1153	SYS-CRLNONINSECTARTH	Arthropoda	Ostracoda	Podocopida	Candonidae		Candona	Candona candida
D	1a		243710	BOLD:AAF4832	13	4	4	24	69.2308	10268900	203.615	30.2215	203.615	99.9625	SYS-CRLNONARTHINVERT	Mollusca	Gastropoda		Physidae		Physa	Physa fontinalis
D	1a		243710	BOLD:ACB6519	15	9	9	23	40	10268900	203.533	35.6677	203.533	99.0822	SYS-CRLNONARTHINVERT	Annelida	Clitellata	Haplotaxida	Naididae	Naidinae	Nais	Nais barbata
D	1a		243710	BOLD:ACL4346	15	7	7	17	53.3333	10268900	204	29.1808	204	97.6804	SYS-CRLNONINSECTARTH	Arthropoda	Arachnida	Araneae	Araneidae		Nephila	Nephila senegalensis
D	1a		243710	BOLD:ACS0354	15	10	10	17	33.3333	10268900	202.533	32.3278	202.533	99.7026	SYS-CRLNONINSECTARTH	Arthropoda	Arachnida	Trombidiformes	Hydrodromidae		Hydrodroma	Hydrodroma despiciens
D	1a		243710	BOLD:AAM6655	16	4	4	59	75	10268900	203.312	32.956	203.312	100	SYS-CRLINSECTA	Arthropoda	Insecta	Diptera	Hybotidae	Tachydromiinae	Platypalpus	Platypalpus stabilis
D	1a		243710	BOLD:ACY5270	16	5	5	59	68.75	10268900	203.75	28.495	203.75	100	SYS-CRLINSECTA	Arthropoda	Insecta	Diptera	Chironomidae	Chironominae	Microtendipes	Microtendipes pedellus, Microtendipes sp. PA6, Microtendipes sp. PA5, Microtendipes sp. PA3, Microtendipes chloris, Microtendipes sp. PA6_2
D	1a		243710	BOLD:ADP2119	16	7	7	22	56.25	10268900	203.875	28.8496	203.875	99.9082	SYS-CRLNONARTHINVERT	Nematoda	Enoplea	Triplonchida	Tobrilidae	Tobrilinae	Tobrilus
D	1a		243710	BOLD:ADZ4684	18	9	9	16	50	10268900	202.667	37.1232	202.444	99.7201	SYS-CRLNONINSECTARTH	Arthropoda	Branchiopoda	Anomopoda	Ilyocryptidae		Ilyocryptus	Ilyocryptus sordidus group
D	1a		243710	BOLD:AAP9060	19	10	10	58	47.3684	10268900	201.105	32.798	201.105	99.7338	SYS-CRLINSECTA	Arthropoda	Insecta	Diptera	Ceratopogonidae	Ceratopogoninae	Palpomyia	Palpomyia lineata
D	1a		243710	BOLD:ABV1930	21	11	11	21	47.619	10268900	199.619	42.1422	201.524	99.7354	SYS-CRLNONARTHINVERT	Annelida	Clitellata	Haplotaxida	Naididae	Tubificinae	Limnodrilus	Limnodrilus hoffmeisteri, Limnodrilus hoffmeisteri X, Limnodrilus hoffmeisteri_X
D	1a		243710	BOLD:AAN7512	22	8	8	19	63.6364	10268900	201.045	39.567	201.045	99.9552	SYS-CRLNONARTHINVERT	Annelida	Clitellata	Haplotaxida	Naididae
D	1a		243710	BOLD:ABU8864	22	11	11	15	50	10268900	201.364	40.0696	201.364	99.7114	SYS-CRLNONINSECTARTH	Arthropoda	Branchiopoda	Anomopoda	Daphniidae		Simocephalus	Simocephalus vetulus, Simocephalus exspinosus
D	1a		243710	BOLD:ACX2014	22	5	5	57	77.2727	10268900	203.727	32.8811	203.636	97.9918	SYS-CRLINSECTA	Arthropoda	Insecta	Diptera	Chironomidae	Chironominae	Tanytarsus	Tanytarsus mendax
D	1a		243710	BOLD:ADX1677	22	7	7	19	68.1818	10268900	175.636	30.7396	202.455	98.484	SYS-CRLNONARTHINVERT	Rotifera	Monogononta	Ploima	Lecanidae		Lecane	Lecane closterocerca
D	1a		243710	BOLD:AAD8054	27	9	9	14	66.6667	10268900	201.889	36.665	201.889	99.0065	SYS-CRLNONINSECTARTH	Arthropoda	Branchiopoda	Anomopoda	Chydoridae	Aloninae	Alona	Alona affinis, Alona quadrangularis group
D	1a		243710	BOLD:AEC2770	27	25	25	56	7.40741	10268900	144.852	45.9216	144.852	97.6958	SYS-CRLINSECTA	Arthropoda	Insecta	Lepidoptera	Sphingidae	Macroglossinae	Perigonia	Perigonia lusca
D	1a		243710	BOLD:ACX1655	28	9	9	13	67.8571	10268900	192.786	34.39	199.286	99.4378	SYS-CRLNONINSECTARTH	Arthropoda	Arachnida	Sarcoptiformes	Humerobatidae
D	1a		243710	BOLD:ACD8415	28	11	11	54	60.7143	10268900	198.393	35.0124	198.393	99.9299	SYS-CRLINSECTA	Arthropoda	Insecta	Diptera	Chironomidae	Chironominae	Chironomus	Chironomus NHRS sp. B, Chironomus nuditarsis, Chironomus curabilis
D	1a		243710	BOLD:ACG9970	28	8	8	54	71.4286	10268900	204.214	34.2294	204.214	99.9293	SYS-CRLINSECTA	Arthropoda	Insecta	Diptera	Chironomidae	Orthocladiinae	Corynoneura	Corynoneura sp. 16ES
D	1a		243710	BOLD:AAB1238	29	8	8	18	72.4138	10268900	201.517	37.1756	201.517	99.9828	SYS-CRLNONARTHINVERT	Annelida	Clitellata	Lumbriculida	Lumbriculidae		Lumbriculus	Lumbriculus variegatus_I, Lumbriculus variegatus
D	1a		243710	BOLD:AAR9373	30	10	10	53	66.6667	10268900	202.3	36.3119	202.3	99.9342	SYS-CRLINSECTA	Arthropoda	Insecta	Diptera	Chironomidae	Chironominae	Cladotanytarsus	Cladotanytarsus iucundus, Cladotanytarsus pallidus
D	1a		243710	BOLD:ABW4815	33	8	8	51	75.7576	10268900	203.03	35.8679	203.03	99.7168	SYS-CRLINSECTA	Arthropoda	Insecta	Coleoptera	Scirtidae	Scirtinae	Scirtes	Scirtes hemisphaericus, Scirtes orbicularis
D	1a		243710	BOLD:ACP6608	33	9	9	51	72.7273	10268900	174	32.7247	203.545	98.3096	SYS-CRLINSECTA	Arthropoda	Insecta	Diptera	Chironomidae	Tanypodinae	Tanypus	Tanypus kraatzi
D	1a		243710	BOLD:AAC1523	34	16	16	6	52.9412	10268900	188.824	52.3682	188.824	99.1268	SYS-CRLCHORDATA	Chordata	Aves	Anseriformes	Anatidae		Aythya	Aythya novaeseelandiae, Aythya marila, Aythya fuligula, Aythya affinis
D	1a		243710	BOLD:AAU2239	35	7	7	50	80	10268900	203.4	35.2124	203.4	99.958	SYS-CRLINSECTA	Arthropoda	Insecta	Diptera	Chironomidae	Chironominae	Cladotanytarsus, Chironomus	Chironomus tentans, Cladotanytarsus atridorsum, Chironomus plumosus, Chironomus usenicus
D	1a		243710	BOLD:ADF0941	36	12	12	49	66.6667	10268900	203	35.3186	203	99.9038	SYS-CRLINSECTA	Arthropoda	Insecta	Diptera	Chironomidae	Chironominae	Cryptochironomus	Cryptochironomus albofasciatus, Cryptochironomus supplicans
D	1a		243710	BOLD:AAW4000	41	11	11	48	73.1707	10268900	201.244	34.6117	201.244	99.7037	SYS-CRLINSECTA	Arthropoda	Insecta	Diptera	Chironomidae	Chironominae	Chironomus	Chironomus melanotus, Chironomus cingulatus
D	1a		243710	BOLD:ACB6471	42	11	11	17	73.8095	10268900	204.048	37.4911	204.048	97.8417	SYS-CRLNONARTHINVERT	Annelida	Clitellata	Haplotaxida	Naididae	Naidinae	Chaetogaster	Chaetogaster diastrophus
D	1a		243710	BOLD:ABZ5549	46	16	16	47	65.2174	10268900	203.065	37.9052	203.065	99.1423	SYS-CRLINSECTA	Arthropoda	Insecta	Diptera	Chironomidae	Orthocladiinae	Psectrocladius	Psectrocladius limbatellus, Psectrocladius ventricosus
D	1a		243710	BOLD:ACS0426	47	13	13	12	72.3404	10268900	200.638	34.6606	200.638	98.4266	SYS-CRLNONINSECTARTH	Arthropoda	Arachnida	Trombidiformes	Hydrodromidae		Hydrodroma	Hydrodroma despiciens
D	1a		243710	BOLD:AAA3774	48	17	17	46	64.5833	10268900	202.812	34.1956	202.771	99.1881	SYS-CRLINSECTA	Arthropoda	Insecta	Diptera	Chironomidae	Chironominae	Tanytarsus	Tanytarsus mendax
D	1a		243710	BOLD:ACS9288	50	21	21	16	58	10268900	182	47.0322	199.26	99.8513	SYS-CRLNONARTHINVERT	Mollusca	Bivalvia	Cardiida, Galeommatida	Lasaeidae, Cardiidae	Montacutinae, Lymnocardiinae	Mysella, Cerastoderma	Cerastoderma glaucum, Mysella bidentata
D	1a		243710	BOLD:ACS0427	52	6	6	11	88.4615	10268900	204.288	32.7974	204.288	99.501	SYS-CRLNONINSECTARTH	Arthropoda	Arachnida	Trombidiformes	Hydrodromidae		Hydrodroma	Hydrodroma despiciens
D	1a		243710	BOLD:ACB9761	52	15	15	15	71.1538	10268900	200.327	28.7313	200.327	99.9433	SYS-CRLNONARTHINVERT	Rotifera	Bdelloidea	Bdelloidea_order_incertae_sedis	Philodinidae		Rotaria	Rotaria rotatoria
D	1a		243710	BOLD:AAL1506	54	11	11	14	79.6296	10268900	201.889	34.943	201.889	99.9717	SYS-CRLNONARTHINVERT	Annelida	Clitellata	Haplotaxida	Naididae	Naidinae	Dero	Dero sp. 1 AEB-2009, Dero sp. Jemmerson Slough-AEB-2002
D	1a		243710	BOLD:ACI0505	55	9	9	13	83.6364	10268900	202.727	31.14	202.727	97.5773	SYS-CRLNONARTHINVERT	Mollusca	Gastropoda		Lymnaeidae		Radix	Radix cf. auricularia, Radix sp. clade 1 CC-2016, Radix auricularia
D	1a		243710	BOLD:ACI5239	57	12	12	12	78.9474	10268900	203.684	39.7608	203.684	99.957	SYS-CRLNONARTHINVERT	Annelida	Clitellata	Haplotaxida	Naididae	Tubificinae	Limnodrilus	Limnodrilus hoffmeisteri_VIII, Limnodrilus hoffmeisteri
D	1a		243710	BOLD:AAU1200	60	13	13	45	78.3333	10268900	203.433	30.2146	203.433	99.4586	SYS-CRLINSECTA	Arthropoda	Insecta	Diptera	Chironomidae	Chironominae	Chironomus, Paratanytarsus	Chironomus plumosus, Paratanytarsus inopertus
D	1a		243710	BOLD:AAF2659	61	13	13	10	78.6885	10268900	203.59	38.4358	203.59	99.5398	SYS-CRLNONINSECTARTH	Arthropoda	Branchiopoda	Anomopoda	Chydoridae	Chydorinae	Chydorus	Chydorus cf. sphaericus, Chydorus sphaericus, Chydorus Sphaericus
D	1a		243710	BOLD:ACM1671	61	19	19	43	68.8525	10268900	202.033	31.8677	202.033	98.3607	SYS-CRLINSECTA	Arthropoda	Insecta	Diptera	Chironomidae	Chironominae	Tanytarsus
D	1a		243710	BOLD:ACX3166	61	10	10	43	83.6066	10268900	203.967	38.0004	203.967	99.9918	SYS-CRLINSECTA	Arthropoda	Insecta	Diptera	Ceratopogonidae	Ceratopogoninae	Probezzia	Probezzia seminigra
D	1a		243710	BOLD:AAP7166	64	10	10	42	84.375	10268900	203.719	30.5541	203.719	98.9873	SYS-CRLINSECTA	Arthropoda	Insecta	Diptera	Chironomidae	Chironominae	Tanytarsus	Tanytarsus usmaensis
D	1a		243710	BOLD:AAC3755	65	20	20	9	69.2308	10268900	200.815	37.5755	200.815	99.7043	SYS-CRLNONINSECTARTH	Arthropoda	Malacostraca	Isopoda	Porcellionidae		Porcellio	Porcellio scaber
D	1a		243710	BOLD:AAW3990	66	12	12	41	81.8182	10268900	203.182	35.5865	203.182	99.9402	SYS-CRLINSECTA	Arthropoda	Insecta	Diptera	Chironomidae	Chironominae	Chironomus	Chironomus balatonicus, Chironomus cf. nudiventris, Chironomus plumosus
D	1a		243710	BOLD:ADA4951	73	10	10	40	86.3014	10268900	204.507	28.9254	204.507	99.946	SYS-CRLINSECTA	Arthropoda	Insecta	Diptera	Chironomidae	Chironominae	Tanytarsus	Tanytarsus verralli
D	1a		243710	BOLD:ADL1113	75	16	16	39	78.6667	10268900	201.48	33.5662	201.48	98.2205	SYS-CRLINSECTA	Arthropoda	Insecta	Diptera	Chironomidae	Chironominae	Polypedilum	Polypedilum nubeculosum
D	1a		243710	BOLD:AAF0053	76	15	15	11	80.2632	10268900	203.868	34.9696	203.868	99.9095	SYS-CRLNONARTHINVERT	Mollusca	Bivalvia	Unionida	Unionidae	Unioninae	Unio	Unio tumidus
D	1a		243710	BOLD:ADJ9286	78	16	16	38	79.4872	10268900	203.09	33.3115	203.09	99.9812	SYS-CRLINSECTA	Arthropoda	Insecta	Diptera	Chironomidae	Orthocladiinae	Nanocladius	Nanocladius dichromus
D	1a		243710	BOLD:AAA8100	84	30	30	5	64.2857	10268900	190.417	54.3957	190.417	99.6932	SYS-CRLCHORDATA	Chordata	Aves	Anseriformes	Anatidae		Tadorna, Anas	Anas fulvigula, Anas platyrhynchos x A. crecca, Anas poecilorhyncha, Anas platyrhynchos, Anas superciliosa, Anas laysanensis, Anas luzonica, Anas rubripes, Anas undulata, Tadorna tadorna
D	1a		243710	BOLD:AAE9024	87	25	25	36	71.2644	10268900	203.069	33.6576	203.023	99.5661	SYS-CRLINSECTA	Arthropoda	Insecta	Diptera	Chironomidae	Chironominae	Chironomus	Chironomus tentans, Chironomus pallidivittatus
D	1a		243710	BOLD:ACB9673	87	15	15	36	82.7586	10268900	203.897	29.3743	203.897	97.9945	SYS-CRLINSECTA	Arthropoda	Insecta	Diptera	Chironomidae	Chironominae	Tanytarsus
D	1a		243710	BOLD:AAD3373	87	33	33	4	62.069	10268900	194.862	48.5874	194.862	99.4768	SYS-CRLCHORDATA	Chordata	Aves	Gruiformes	Rallidae		Fulica	Fulica atra
D	1a		243710	BOLD:AAF3606	88	14	14	10	84.0909	10268900	203.83	34.0364	203.83	99.9945	SYS-CRLNONARTHINVERT	Annelida	Clitellata	Haplotaxida	Naididae	Naidinae	Stylaria	Stylaria lacustris
D	1a		243710	BOLD:AAD6712	91	31	31	9	65.9341	10268900	199.484	31.4343	201.626	99.6301	SYS-CRLNONARTHINVERT	Mollusca	Gastropoda		Lymnaeidae		Radix	Radix sp. MOTU 4, Radix sp., Radix auricularia, Radix sp. KIE1, Radix zue
D	1a		243710	BOLD:AAV8406	93	15	15	35	83.871	10268900	202.022	31.5148	202.022	98.3127	SYS-CRLINSECTA	Arthropoda	Insecta	Diptera	Chironomidae	Chironominae	Tanytarsus	Tanytarsus verralli
D	1a		243710	BOLD:AEC3112	101	31	31	8	69.3069	10268900	202.822	32.2064	202.822	99.0149	SYS-CRLNONINSECTARTH	Arthropoda	Arachnida	Trombidiformes	Unionicolidae	Pionatacinae	Neumania
D	1a		243710	BOLD:ACK5400	106	29	29	8	72.6415	10268900	201.189	39.5263	201.189	99.9099	SYS-CRLNONARTHINVERT	Annelida	Clitellata	Haplotaxida	Naididae	Tubificinae	Potamothrix	Potamothrix moldaviensis
D	1a		243710	BOLD:ADF2204	111	17	17	34	84.6847	10268900	203.856	34.1011	203.838	99.6857	SYS-CRLINSECTA	Arthropoda	Insecta	Diptera	Chironomidae	Chironominae	Cladotanytarsus	Cladotanytarsus mancus
D	1a		243710	BOLD:ADD8285	120	26	26	7	78.3333	10268900	201.075	38.1628	201.025	99.4394	SYS-CRLNONINSECTARTH	Arthropoda	Branchiopoda	Anomopoda	Eurycercidae		Eurycercus	Eurycercus cf. lamellatus
D	1a		243710	BOLD:AAU4046	120	23	23	33	80.8333	10268900	201.617	36.6524	201.617	99.9506	SYS-CRLINSECTA	Arthropoda	Insecta	Diptera	Chironomidae	Chironominae	Chironomus	Chironomus melanotus, Chironomus annularius
D	1a		243710	BOLD:ADD9335	135	20	20	6	85.1852	10268900	203.97	37.4625	203.911	99.9675	SYS-CRLNONINSECTARTH	Arthropoda	Branchiopoda	Anomopoda	Eurycercidae		Eurycercus	Eurycercus cf. lamellatus
D	1a		243710	BOLD:ACY8157	139	38	38	32	72.6619	10268900	202.597	32.037	202.597	99.1477	SYS-CRLINSECTA	Arthropoda	Insecta	Diptera	Chironomidae	Chironominae	Tanytarsus	Tanytarsus usmaensis
D	1a		243710	BOLD:ADF1572	151	23	23	31	84.7682	10268900	202.536	36.3484	202.536	98.7211	SYS-CRLINSECTA	Arthropoda	Insecta	Diptera	Chironomidae	Chironominae	Chironomus	Chironomus plumosus
D	1a		243710	BOLD:ADA4952	159	32	32	30	79.8742	10268900	202.56	30.499	202.56	99.7938	SYS-CRLINSECTA	Arthropoda	Insecta	Diptera	Chironomidae	Chironominae	Tanytarsus	Tanytarsus verralli
D	1a		243710	BOLD:ADL1458	160	35	35	29	78.125	10268900	201.025	31.7202	201.025	98.0077	SYS-CRLINSECTA	Arthropoda	Insecta	Diptera	Chironomidae	Orthocladiinae	Cricotopus	Cricotopus ornatus
D	1a		243710	BOLD:AAP5876	170	31	31	27	81.7647	10268900	202.476	32.4335	202.476	99.9419	SYS-CRLINSECTA	Arthropoda	Insecta	Diptera	Chironomidae	Chironominae	Tanytarsus	Tanytarsus telmaticus, Tanytarsus lestagei
D	1a		243710	BOLD:AAI6827	170	43	43	27	74.7059	10268900	197.041	44.2983	197.041	99.9405	SYS-CRLINSECTA	Arthropoda	Insecta	Ephemeroptera	Caenidae	Caeninae	Caenis	Caenis horaria
D	1a		243710	BOLD:ACS6392	177	29	29	26	83.6158	10268900	203.316	32.8361	203.322	99.9523	SYS-CRLINSECTA	Arthropoda	Insecta	Diptera	Chironomidae	Orthocladiinae	Cricotopus	Cricotopus intersectus
D	1a		243710	BOLD:ACR9864	180	29	29	5	83.8889	10268900	203.028	32.199	203.028	99.9414	SYS-CRLNONINSECTARTH	Arthropoda	Arachnida	Trombidiformes	Pionidae	Pioninae	Piona	Piona carnea
D	1a		243710	BOLD:AAU2145	181	38	38	25	79.0055	10268900	202.757	33.6512	202.757	99.9147	SYS-CRLINSECTA	Arthropoda	Insecta	Diptera	Chironomidae	Orthocladiinae	Cricotopus	Cricotopus intersectus
D	1a		243710	BOLD:ABZ9874	181	44	44	4	75.6906	10268900	201.083	40.5872	201.083	99.8456	SYS-CRLNONINSECTARTH	Arthropoda	Ostracoda	Podocopida	Candonidae		Pseudocandona	Pseudocandona compressa
D	1a		243710	BOLD:AAA6805	197	34	34	7	82.7411	10268900	203.802	38.3751	203.802	99.4612	SYS-CRLNONARTHINVERT	Annelida	Clitellata	Haplotaxida	Naididae	Tubificinae	Tubifex	Tubifex tubifex
D	1a		243710	BOLD:ACK3819	206	38	38	24	81.5534	10268900	202.898	32.5985	202.898	99.7014	SYS-CRLINSECTA	Arthropoda	Insecta	Diptera	Chironomidae	Tanypodinae	Psectrotanypus	Psectrotanypus varius
D	1a		243710	BOLD:AEB2426	207	29	29	23	85.9903	10268900	204.256	33.7145	204.256	99.4796	SYS-CRLINSECTA	Arthropoda	Insecta	Diptera	Chironomidae	Chironominae	Polypedilum	Polypedilum nubeculosum
D	1a		243710	BOLD:AAY2074	222	36	36	22	83.7838	10268900	202.162	35.3621	202.162	99.4612	SYS-CRLINSECTA	Arthropoda	Insecta	Diptera	Chironomidae	Chironominae	Harnischia	Harnischia curtilamellata
D	1a		243710	BOLD:AAL8214	277	43	43	3	84.4765	10268900	202.628	36.3193	202.628	99.9495	SYS-CRLNONINSECTARTH	Arthropoda	Ostracoda	Podocopida	Cyprididae	Cypridopsinae	Potamocypris	Potamocypris unicaudata, Potamocypris smaragdina
D	1a		243710	BOLD:ACR8610	280	33	33	21	88.2143	10268900	202.614	34.4475	202.614	99.9586	SYS-CRLINSECTA	Arthropoda	Insecta	Diptera	Chironomidae	Chironominae	Cladotanytarsus	Cladotanytarsus mancus
D	1a		243710	BOLD:AAV9062	287	73	73	20	74.5645	10268900	202.672	30.8875	202.672	99.7775	SYS-CRLINSECTA	Arthropoda	Insecta	Diptera	Chironomidae	Orthocladiinae	Cricotopus	Cricotopus arcuatus, Cricotopus intersectus, Cricotopus laricomalis
D	1a		243710	BOLD:AAK9986	303	51	51	19	83.1683	10268900	202.848	31.9927	202.848	99.9294	SYS-CRLINSECTA	Arthropoda	Insecta	Diptera	Chironomidae	Orthocladiinae	Psectrocladius	Psectrocladius limbatellus, Psectrocladius sp. 4TE, Psectrocladius sordidellus
D	1a		243710	BOLD:ACR8614	308	31	31	18	89.9351	10268900	204.218	32.9682	204.218	99.9569	SYS-CRLINSECTA	Arthropoda	Insecta	Diptera	Chironomidae	Chironominae	Cladotanytarsus	Cladotanytarsus mancus sp. 2TE
D	1a		243710	BOLD:ADD6917	310	52	52	2	83.2258	10268900	202.777	36.3699	202.616	99.2209	SYS-CRLNONINSECTARTH	Arthropoda	Branchiopoda	Anomopoda	Eurycercidae		Eurycercus	Eurycercus lamellatus
D	1a		243710	BOLD:ACK5110	329	74	74	6	77.5076	10268900	202.015	39.5272	202.043	99.7047	SYS-CRLNONARTHINVERT	Annelida	Clitellata	Haplotaxida	Naididae	Tubificinae	Potamothrix	Potamothrix moldaviensis
D	1a		243710	BOLD:AAA5299	331	62	62	17	81.2689	10268900	202.906	32.4866	202.909	99.4023	SYS-CRLINSECTA	Arthropoda	Insecta	Diptera	Chironomidae	Orthocladiinae	Cricotopus	Cricotopus laetus, Cricotopus relucens, Cricotopus sp., Cricotopus sp. 3ES, Cricotopus sylvestris, Cricotopus glacialis
D	1a		243710	BOLD:ACV7006	382	78	78	5	79.5812	10268900	202.796	37.2186	202.801	99.9225	SYS-CRLNONARTHINVERT	Annelida	Clitellata	Haplotaxida	Naididae	Tubificinae	Limnodrilus	Limnodrilus claparedianus, Limnodrilus claparedeanus
D	1a		243710	BOLD:AAW4936	385	62	62	16	83.8961	10268900	202.616	33.8571	202.608	99.2762	SYS-CRLINSECTA	Arthropoda	Insecta	Diptera	Chironomidae	Chironominae	Cryptochironomus	Cryptochironomus obreptans, Cryptochironomus supplicans
D	1a		243710	BOLD:AEB6123	411	82	82	4	80.0487	10268900	202.139	38.726	202.139	99.9145	SYS-CRLNONARTHINVERT	Annelida	Clitellata	Haplotaxida	Naididae	Tubificinae	Tubifex	Tubifex tubifex
D	1a		243710	BOLD:ACG9929	448	67	67	15	85.0446	10268900	203.493	33.7638	203.48	99.945	SYS-CRLINSECTA	Arthropoda	Insecta	Diptera	Chironomidae	Chironominae	Tanytarsus	Tanytarsus medius
D	1a		243710	BOLD:ACV8313	473	96	96	3	79.704	10268900	198.596	45.5775	198.596	99.6906	SYS-CRLNONARTHINVERT	Annelida	Clitellata	Haplotaxida	Naididae	Rhyacodrilinae	Bothrioneurum	Bothrioneurum vejdovskyanum
D	1a		243710	BOLD:ADK1445	476	66	66	14	86.1345	10268900	202.454	30.7025	202.454	99.6674	SYS-CRLINSECTA	Arthropoda	Insecta	Diptera	Chironomidae	Chironominae	Tanytarsus	Tanytarsus verralli
D	1a		243710	BOLD:AEB6122	500	97	97	2	80.6	10268900	202.582	37.6655	202.584	99.7087	SYS-CRLNONARTHINVERT	Annelida	Clitellata	Haplotaxida	Naididae	Tubificinae	Tubifex	Tubifex tubifex
D	1a		243710	BOLD:AAG5527	510	63	63	12	87.6471	10268900	202.929	30.9724	202.929	99.7219	SYS-CRLINSECTA	Arthropoda	Insecta	Diptera	Chironomidae	Tanypodinae	Procladius	Procladius rufovittatus
D	1a		243710	BOLD:ACB9674	534	62	62	11	88.3895	10268900	201.15	31.7764	201.152	99.8782	SYS-CRLINSECTA	Arthropoda	Insecta	Diptera	Chironomidae	Chironominae	Tanytarsus	Tanytarsus verralli
D	1a		243710	BOLD:AAV7098	536	105	105	10	80.4104	10268900	202.765	35.5852	202.765	99.0302	SYS-CRLINSECTA	Arthropoda	Insecta	Diptera	Chironomidae	Chironominae	Tanytarsus	Tanytarsus occultus, Tanytarsus NHRS sp. A
D	1a		243710	BOLD:AAC7275	718	163	163	2	77.2981	10268900	193.731	50.4644	193.734	99.6485	SYS-CRLCHORDATA	Chordata	Aves	Anseriformes	Anatidae		Anser	Anser fabalis, Anser erythropus, Anser brachyrhynchus, Anser cygnoides, Anser albifrons, Anser caerulescens, Anser anser, Anser sp., Anser indicus, Anser canagicus, Anser rossii
D	1a		243710	BOLD:AAK6479	749	128	128	9	82.9105	10268900	197.649	37.9551	200.931	99.9373	SYS-CRLINSECTA	Arthropoda	Insecta	Hemiptera	Corixidae	Micronectinae	Micronecta	Micronecta scholtzi
D	1a		243710	BOLD:AAJ3263	765	158	158	8	79.3464	10268900	202.618	35.3906	202.622	99.119	SYS-CRLINSECTA	Arthropoda	Insecta	Diptera	Chironomidae	Chironominae	Cladotanytarsus	Cladotanytarsus atridorsum
D	1a		243710	BOLD:AAY3395	924	165	165	7	82.1429	10268900	202.083	33.0292	202.083	99.3182	SYS-CRLINSECTA	Arthropoda	Insecta	Diptera	Chironomidae	Chironominae	Polypedilum	Polypedilum nubeculosum
D	1a		243710	BOLD:ACV9616	1083	187	187	1	82.7331	10268900	201.236	39.1433	201.236	99.7773	SYS-CRLNONARTHINVERT	Annelida	Clitellata	Haplotaxida	Naididae	Tubificinae	Limnodrilus
D	1a		243710	BOLD:AAM6003	1124	173	173	6	84.6085	10268900	202.99	35.9555	202.99	99.7524	SYS-CRLINSECTA	Arthropoda	Insecta	Diptera	Chironomidae	Chironominae	Dicrotendipes	Dicrotendipes pulsus, Dicrotendipes modestus
D	1a		243710	BOLD:AAX2700	1203	172	172	5	85.7024	10268900	203.05	33.6257	203.052	98.8996	SYS-CRLINSECTA	Arthropoda	Insecta	Diptera	Chironomidae	Chironominae	Parachironomus	Parachironomus gracilior
D	1a		243710	BOLD:AAQ0622	1934	274	274	4	85.8325	10268900	203.164	29.7316	203.165	99.3502	SYS-CRLINSECTA	Arthropoda	Insecta	Diptera	Chironomidae	Chironominae	Tanytarsus	Tanytarsus verralli
D	1a		243710	BOLD:AAA7175	3031	489	489	1	83.8667	10268900	193.596	46.1047	193.596	99.5005	SYS-CRLCHORDATA	Chordata	Actinopterygii	Cypriniformes	Cyprinidae	Cyprininae	Cyprinus	Cyprinus rubrofuscus, Procypris mera, Cyprinus carpio x Procypris rabaudi, Carassius auratus, Cyprinus intha, Cyprinus acutidorsalis, Cyprinus carpio Furong x Carassius auratus red var., Cyprinus carpio wuyuanensis x Carassius auratus, Cyprinus carpio, Cyprinus multitaeniata, Cyprinus megalophthalmus, Cyprinus carpio specularis x Carassius cuvieri, Cyprinus pellegrini, Labeo calbasu
D	1a		243710	BOLD:ACD4470	3761	440	440	3	88.301	10268900	202.338	35.9429	202.339	99.8807	SYS-CRLINSECTA	Arthropoda	Insecta	Diptera	Chironomidae	Chironominae	Glyptotendipes	Glyptotendipes glacus, Glyptotendipes pallens, Glyptotendipes nr. paripes
D	1a		243710	BOLD:ACB8413	4882	633	633	2	87.034	10268900	202.72	34.9082	202.72	99.7744	SYS-CRLINSECTA	Arthropoda	Insecta	Diptera	Chaoboridae	Chaoborinae	Chaoborus	Chaoborus flavicans
D	1a		243710	BOLD:ABZ9053	11894	1145	1145	1	90.3733	10268900	202.299	38.7692	202.299	98.9056	SYS-CRLNONINSECTARTH	Arthropoda	Ostracoda	Podocopida	Limnocytheridae		Limnocythere	Limnocythere inopinata
D	1a		243710	BOLD:AEC3568	31770	3277	3277	1	89.6852	10268900	202.912	32.4995	202.916	99.6654	SYS-CRLINSECTA	Arthropoda	Insecta	Diptera	Chironomidae	Orthocladiinae	Cricotopus	Cricotopus intersectus, Cricotopus laricomalis
D	1b		283674	BOLD:ABW2734	3	2	2	93	33.3333	10514312	202.667	34.7036	202.667	100	SYS-CRLINSECTA	Arthropoda	Insecta	Diptera	Chironomidae	Orthocladiinae	Limnophyes	Limnophyes sp. 14ES
D	1b		283674	BOLD:AAB0356	3	3	3	11	0	10514312	202.667	43.6068	202.667	99.8374	SYS-CRLCHORDATA	Chordata	Actinopterygii	Perciformes	Percidae	Percinae	Perca	Perca fluviatilis
D	1b		283674	BOLD:AAB6433	3	3	3	40	0	10514312	202.667	33.3883	202.667	99.67	SYS-CRLNONARTHINVERT	Mollusca	Gastropoda		Physidae		Physella	Physella acuta, Physella aff. acuta MOH16Phy1, Physella virgata, Physella gyrina, Physella anatina
D	1b		283674	BOLD:ADP2119	3	1	1	40	66.6667	10514312	202	28.2178	202	97.5248	SYS-CRLNONARTHINVERT	Nematoda	Enoplea	Triplonchida	Tobrilidae	Tobrilinae	Tobrilus
D	1b		283674	BOLD:ACQ7477	4	4	4	38	0	10514312	204.75	36.1436	204.75	100	SYS-CRLNONARTHINVERT	Annelida	Clitellata	Haplotaxida	Naididae	Tubificinae	Potamothrix	Potamothrix heuscheri
D	1b		283674	BOLD:ABX8802	4	4	4	87	0	10514312	202.5	34.1979	202.5	100	SYS-CRLINSECTA	Arthropoda	Insecta	Coleoptera	Dytiscidae	Laccophilinae	Laccophilus	Laccophilus hyalinus
D	1b		283674	BOLD:AAY2074	4	3	3	87	25	10514312	203.25	34.8112	203.25	99.508	SYS-CRLINSECTA	Arthropoda	Insecta	Diptera	Chironomidae	Chironominae	Harnischia	Harnischia curtilamellata
D	1b		283674	BOLD:ADF1590	4	3	3	87	25	10514312	204.5	36.675	204.5	99.878	SYS-CRLINSECTA	Arthropoda	Insecta	Diptera	Chironomidae	Chironominae	Tanytarsus	Tanytarsus smolandicus, Tanytarsus mendax
D	1b		283674	BOLD:ADT5837	4	4	4	87	0	10514312	204.25	34.885	204.25	98.0416	SYS-CRLINSECTA	Arthropoda	Insecta	Diptera
D	1b		283674	BOLD:ABA3933	4	3	3	87	25	10514312	204.25	39.0471	204.25	98.7757	SYS-CRLINSECTA	Arthropoda	Insecta	Hemiptera	Miridae	Deraeocorinae	Deraeocoris	Deraeocoris flavilinea
D	1b		283674	BOLD:ABV2554	4	3	3	87	25	10514312	204.25	40.028	204.25	99.2647	SYS-CRLINSECTA	Arthropoda	Insecta	Hemiptera	Cicadellidae	Deltocephalinae	Sorhoanus, Stenometopiellus	Stenometopiellus sigillatus, Sorhoanus uhleri, Sorhoanus pascuellus
D	1b		283674	BOLD:ACH7545	4	4	4	23	0	10514312	202.75	39.2104	202.75	99.261	SYS-CRLNONINSECTARTH	Arthropoda	Malacostraca	Isopoda	Asellidae		Proasellus	Proasellus coxalis
D	1b		283674	BOLD:ACH7545	4	1	1	1	75	10514312	202	40.099	202	100	DS-GBOLMZB	Arthropoda	Malacostraca	Isopoda	Asellidae		Proasellus	Proasellus coxalis
D	1b		283674	BOLD:ACA3261	4	4	4	38	0	10514312	199.5	38.0205	199.5	99.2407	SYS-CRLNONARTHINVERT	Rotifera	Monogononta	Ploima	Lepadellidae		Lepadella	Lepadella cf. ovalis
D	1b		283674	BOLD:ABZ4910	5	5	5	22	0	10514312	193.2	42.7431	193.2	99.3454	SYS-CRLNONINSECTARTH	Arthropoda	Branchiopoda	Anomopoda	Daphniidae		Daphnia	Daphnia arenata, Daphnia cf. middendorffiana, Daphnia cf. pulex sp.2 NA, Daphnia cf. pulicaria sp. 2 NA, Simocephalus punctatus, Daphnia curvirostris, Daphnia melanica, Daphnia pulicaria, Daphnia middendorffiana, Daphnia cf. pulex sp.2NA
D	1b		283674	BOLD:AAV8401	5	4	4	85	20	10514312	203.4	32.9416	203.4	99.5083	SYS-CRLINSECTA	Arthropoda	Insecta	Diptera	Chironomidae	Chironominae	Tanytarsus	Tanytarsus excavatus
D	1b		283674	BOLD:AEC3341	5	4	4	85	20	10514312	187.4	37.9572	187.4	98.1244	SYS-CRLINSECTA	Arthropoda	Insecta	Diptera	Ceratopogonidae	Ceratopogoninae	Probezzia
D	1b		283674	BOLD:ACR5689	6	4	4	83	33.3333	10514312	199	33.012	199	99.0015	SYS-CRLINSECTA	Arthropoda	Insecta	Diptera	Chironomidae	Chironominae	Tanytarsus	Tanytarsus lestagei
D	1b		283674	BOLD:ADL2119	6	4	4	83	33.3333	10514312	202.5	33.8325	202.5	100	SYS-CRLINSECTA	Arthropoda	Insecta	Diptera	Chironomidae	Chironominae	Cryptochironomus	Cryptochironomus supplicans
D	1b		283674	BOLD:AAA7350	6	6	6	10	0	10514312	203.833	42.4397	203.833	99.6744	SYS-CRLCHORDATA	Chordata	Actinopterygii	Cypriniformes	Cyprinidae	Tincinae	Tinca	Tinca tinca
D	1b		283674	BOLD:AAD9208	6	6	6	35	0	10514312	200.5	40.1981	201.5	99.5011	SYS-CRLNONARTHINVERT	Mollusca	Bivalvia	Unionida	Unionidae	Unioninae	Unio	Unio pictorum
D	1b		283674	BOLD:AAN9288	6	4	4	35	33.3333	10514312	203.333	33.7726	203.333	99.4241	SYS-CRLNONARTHINVERT	Mollusca	Gastropoda		Lymnaeidae		Radix	Radix ovata, Radix peregra, Lymnaea peregra, Radix 136m4, Radix balthica
D	1b		283674	BOLD:AAM2090	6	3	3	35	50	10514312	203.333	28.8766	204.333	99.5082	SYS-CRLNONARTHINVERT	Rotifera	Bdelloidea	Bdelloidea_order_incertae_sedis	Philodinidae		Philodina	Philodina citrina
D	1b		283674	BOLD:ACB6595	7	3	3	34	57.1429	10514312	202	46.048	202	100	SYS-CRLNONARTHINVERT	Annelida	Clitellata	Haplotaxida	Naididae	Rhyacodrilinae	Bothrioneurum	Bothrioneurum vejdovskyanum
D	1b		283674	BOLD:AAX5286	7	3	3	21	57.1429	10514312	204.143	33.03	204.143	99.2304	SYS-CRLNONINSECTARTH	Arthropoda	Arachnida	Trombidiformes	Limnesiidae	Limnesiinae	Limnesia	Limnesia undulata
D	1b		283674	BOLD:ABZ6609	8	5	5	80	37.5	10514312	169.625	36.3994	169.625	97.9093	SYS-CRLINSECTA	Arthropoda	Insecta	Diptera	Chironomidae	Chironominae	Dicrotendipes	Dicrotendipes pulsus, Dicrotendipes modestus
D	1b		283674	BOLD:ACR8609	8	3	3	80	62.5	10514312	202.375	34.103	202.375	99.7507	SYS-CRLINSECTA	Arthropoda	Insecta	Diptera	Chironomidae	Chironominae	Cladotanytarsus	Cladotanytarsus mancus-agg., Cladotanytarsus mancus
D	1b		283674	BOLD:ADS0374	8	5	5	80	37.5	10514312	203.75	35.8237	203.75	98.3439	SYS-CRLINSECTA	Arthropoda	Insecta	Diptera	Chironomidae	Chironominae	Tanytarsus	Tanytarsus occultus
D	1b		283674	BOLD:ACB8775	10	7	7	32	30	10514312	197	37.2877	197	99.951	SYS-CRLNONARTHINVERT	Annelida	Clitellata	Haplotaxida	Naididae	Tubificinae	Limnodrilus
D	1b		283674	BOLD:AAU1021	10	5	5	77	50	10514312	200.1	31.6426	200.1	98.503	SYS-CRLINSECTA	Arthropoda	Insecta	Diptera	Chironomidae	Chironominae	Dicrotendipes	Dicrotendipes nervosus
D	1b		283674	BOLD:AEB0319	10	3	3	77	70	10514312	204.4	33.5124	204.4	98.5323	SYS-CRLINSECTA	Arthropoda	Insecta	Diptera	Chironomidae	Chironominae	Cladotanytarsus	Cladotanytarsus mancus
D	1b		283674	BOLD:AAB0861	10	4	4	77	60	10514312	203.7	30.2049	203.7	98.283	SYS-CRLINSECTA	Arthropoda	Insecta	Trichoptera	Leptoceridae	Leptocerinae	Oecetis	Oecetis ochracea, Oecetis cf. ochracea CHU1
D	1b		283674	BOLD:AAL8214	10	5	5	20	50	10514312	201.4	36.5824	201.4	99.9459	SYS-CRLNONINSECTARTH	Arthropoda	Ostracoda	Podocopida	Cyprididae	Cypridopsinae	Potamocypris	Potamocypris unicaudata, Potamocypris smaragdina
D	1b		283674	BOLD:AAF0053	10	8	8	32	20	10514312	201.1	35.1872	201.1	99.8527	SYS-CRLNONARTHINVERT	Mollusca	Bivalvia	Unionida	Unionidae	Unioninae	Unio	Unio tumidus
D	1b		283674	BOLD:ACX7742	11	6	6	19	45.4545	10514312	202.455	44.9934	202.455	99.6865	SYS-CRLNONINSECTARTH	Arthropoda	Collembola	Entomobryomorpha	Isotomidae		Isotomurus	Isotomurus palustris
D	1b		283674	BOLD:ADT7895	11	3	3	76	72.7273	10514312	201.182	33.6547	201.182	98.9014	SYS-CRLINSECTA	Arthropoda	Insecta	Diptera	Chaoboridae	Chaoborinae	Chaoborus	Chaoborus flavicans
D	1b		283674	BOLD:AAU0687	12	6	6	17	50	10514312	203.583	34.634	203.583	99.5911	SYS-CRLNONINSECTARTH	Arthropoda	Arachnida	Trombidiformes	Pionidae	Pioninae	Piona	Piona stjoerdalensis
D	1b		283674	BOLD:ACB0425	12	7	7	17	41.6667	10514312	186.833	39.893	186.833	99.6038	SYS-CRLNONINSECTARTH	Arthropoda	Branchiopoda	Anomopoda	Chydoridae	Chydorinae	Chydorus	Chydorus sphaericus
D	1b		283674	BOLD:AAG5487	12	2	2	75	83.3333	10514312	204.5	30.318	204.5	100	SYS-CRLINSECTA	Arthropoda	Insecta	Diptera	Chironomidae	Tanypodinae	Procladius	Procladius choreus-agg.cinereus-t., Procladius ferrugineus, Procladius crassinervis
D	1b		283674	BOLD:AAE1552	14	8	8	74	42.8571	10514312	200.857	31.5093	200.857	99.4665	SYS-CRLINSECTA	Arthropoda	Insecta	Trichoptera	Molannidae		Molanna	Molanna angustata
D	1b		283674	BOLD:AAP5930	15	8	8	73	46.6667	10514312	203.533	32.4299	203.533	98.4262	SYS-CRLINSECTA	Arthropoda	Insecta	Diptera	Chironomidae	Orthocladiinae	Cricotopus	Cricotopus laricomalis
D	1b		283674	BOLD:AAN7512	16	6	6	30	62.5	10514312	200.125	39.7095	200.125	100	SYS-CRLNONARTHINVERT	Annelida	Clitellata	Haplotaxida	Naididae
D	1b		283674	BOLD:ACV7082	16	7	7	30	56.25	10514312	200.438	36.5699	200.438	99.9666	SYS-CRLNONARTHINVERT	Annelida	Clitellata	Haplotaxida	Naididae	Tubificinae	Tubifex	Tubifex montanus
D	1b		283674	BOLD:AAW1777	16	8	8	16	50	10514312	201.812	34.9904	203.312	98.9172	SYS-CRLNONINSECTARTH	Arthropoda	Branchiopoda	Anomopoda	Chydoridae	Aloninae	Alona	Alona rectangula
D	1b		283674	BOLD:ACO8871	16	4	4	72	75	10514312	202.938	37.8837	202.938	99.0144	SYS-CRLINSECTA	Arthropoda	Insecta	Diptera	Chironomidae	Chironominae	Chironomus	Chironomus sp. PA15, Chironomus anthracinus
D	1b		283674	BOLD:AAB1238	17	7	7	29	58.8235	10514312	202	37.1299	202	99.9082	SYS-CRLNONARTHINVERT	Annelida	Clitellata	Lumbriculida	Lumbriculidae		Lumbriculus	Lumbriculus variegatus_I, Lumbriculus variegatus
D	1b		283674	BOLD:ACS0426	17	3	3	15	82.3529	10514312	203.235	34.4155	203.235	98.4656	SYS-CRLNONINSECTARTH	Arthropoda	Arachnida	Trombidiformes	Hydrodromidae		Hydrodroma	Hydrodroma despiciens
D	1b		283674	BOLD:ADK1947	18	5	5	71	72.2222	10514312	203.833	34.8871	203.833	98.9643	SYS-CRLINSECTA	Arthropoda	Insecta	Diptera	Chironomidae	Chironominae	Cladotanytarsus	Cladotanytarsus mancus
D	1b		283674	BOLD:ACS0427	19	6	6	14	68.4211	10514312	204.526	32.7587	204.526	99.3822	SYS-CRLNONINSECTARTH	Arthropoda	Arachnida	Trombidiformes	Hydrodromidae		Hydrodroma	Hydrodroma despiciens
D	1b		283674	BOLD:ACI0596	20	11	11	13	45	10514312	198.1	40.776	198.1	98.2059	SYS-CRLNONINSECTARTH	Arthropoda	Collembola	Symphypleona	Sminthuridae	Sminthurinae	Sminthurus	Sminthurus viridis
D	1b		283674	BOLD:ACB6471	21	7	7	27	66.6667	10514312	203.619	37.371	203.619	97.4973	SYS-CRLNONARTHINVERT	Annelida	Clitellata	Haplotaxida	Naididae	Naidinae	Chaetogaster	Chaetogaster diastrophus
D	1b		283674	BOLD:ACK5110	21	7	7	27	66.6667	10514312	203.619	39.4532	203.619	99.7879	SYS-CRLNONARTHINVERT	Annelida	Clitellata	Haplotaxida	Naididae	Tubificinae	Potamothrix	Potamothrix moldaviensis
D	1b		283674	BOLD:AAA8100	21	12	12	9	42.8571	10514312	199.238	53.9455	199.238	99.6819	SYS-CRLCHORDATA	Chordata	Aves	Anseriformes	Anatidae		Tadorna, Anas	Anas fulvigula, Anas platyrhynchos x A. crecca, Anas poecilorhyncha, Anas platyrhynchos, Anas superciliosa, Anas laysanensis, Anas luzonica, Anas rubripes, Anas undulata, Tadorna tadorna
D	1b		283674	BOLD:AAG8416	22	11	11	26	50	10514312	201.955	37.9274	201.955	99.9108	SYS-CRLNONARTHINVERT	Annelida	Clitellata	Haplotaxida	Naididae	Naidinae	Nais
D	1b		283674	BOLD:AAM7856	24	7	7	70	70.8333	10514312	204.292	29.8629	204.292	99.9592	SYS-CRLINSECTA	Arthropoda	Insecta	Thysanoptera	Thripidae	Thripinae
D	1b		283674	BOLD:ACP9482	26	11	11	25	57.6923	10514312	203.385	33.2933	203.385	99.7554	SYS-CRLNONARTHINVERT	Annelida	Clitellata	Arhynchobdellida	Erpobdellidae	Erpobdellinae	Erpobdella	Erpobdella octoculata
D	1b		283674	BOLD:AEC2770	26	21	21	69	19.2308	10514312	140.731	45.8641	140.731	97.6768	SYS-CRLINSECTA	Arthropoda	Insecta	Lepidoptera	Sphingidae	Macroglossinae	Perigonia	Perigonia lusca
D	1b		283674	BOLD:AAB5640	27	9	9	68	66.6667	10514312	198.852	30.2415	198.852	100	SYS-CRLINSECTA	Arthropoda	Insecta	Coleoptera	Coccinellidae	Coccinellinae	Chilocorus, Harmonia	Chilocorus renipustulatus, Harmonia axyridis, Harmonia sp. O98
D	1b		283674	BOLD:ACS0357	28	8	8	12	71.4286	10514312	203.75	32.8329	203.75	99.9475	SYS-CRLNONINSECTARTH	Arthropoda	Arachnida	Trombidiformes	Pionidae	Pioninae	Piona	Piona pusilla
D	1b		283674	BOLD:ACA9131	29	6	6	24	79.3103	10514312	202.793	36.516	202.793	97.8675	SYS-CRLNONARTHINVERT	Annelida	Clitellata	Haplotaxida	Naididae	Naidinae	Uncinais	Uncinais uncinata
D	1b		283674	BOLD:ADD6293	29	16	16	11	44.8276	10514312	200.483	40.9741	200.345	98.2499	SYS-CRLNONINSECTARTH	Arthropoda	Ostracoda	Podocopida	Candonidae		Candona	Candona candida
D	1b		283674	BOLD:AAA8488	29	13	13	8	55.1724	10514312	202.724	47.2245	202.724	99.9306	SYS-CRLCHORDATA	Chordata	Actinopterygii	Scorpaeniformes	Gasterosteidae		Gasterosteus	Gasterosteus gymnurus, Gasterosteus sp., Gasterosteus islandicus, Gasterosteus aculeatus
D	1b		283674	BOLD:ADF0941	31	8	8	67	74.1935	10514312	201.129	35.1661	201.129	99.9521	SYS-CRLINSECTA	Arthropoda	Insecta	Diptera	Chironomidae	Chironominae	Cryptochironomus	Cryptochironomus albofasciatus, Cryptochironomus supplicans
D	1b		283674	BOLD:ADA4459	32	8	8	66	75	10514312	203.906	33.0735	203.906	99.4637	SYS-CRLINSECTA	Arthropoda	Insecta	Diptera	Chironomidae	Chironominae	Tanytarsus	Tanytarsus occultus
D	1b		283674	BOLD:ADX1677	32	10	10	23	68.75	10514312	173.938	31.0866	203.438	98.9351	SYS-CRLNONARTHINVERT	Rotifera	Monogononta	Ploima	Lecanidae		Lecane	Lecane closterocerca
D	1b		283674	BOLD:AAR9373	33	15	15	64	54.5455	10514312	202.091	36.6938	202.091	99.8041	SYS-CRLINSECTA	Arthropoda	Insecta	Diptera	Chironomidae	Chironominae	Cladotanytarsus	Cladotanytarsus iucundus, Cladotanytarsus pallidus
D	1b		283674	BOLD:AEA8657	33	13	13	64	60.6061	10514312	204.424	34.1533	204.424	99.0212	SYS-CRLINSECTA	Arthropoda	Insecta	Diptera	Chironomidae	Chironominae	Polypedilum	Polypedilum nubeculosum
D	1b		283674	BOLD:ADJ8677	39	14	14	22	64.1026	10514312	202.692	40.7264	202.692	99.9243	SYS-CRLNONARTHINVERT	Annelida	Clitellata	Haplotaxida	Naididae	Tubificinae	Psammoryctides	Psammoryctides albicola
D	1b		283674	BOLD:ACB6519	40	18	18	21	55	10514312	203.65	35.9579	203.65	99.5841	SYS-CRLNONARTHINVERT	Annelida	Clitellata	Haplotaxida	Naididae	Naidinae	Nais	Nais barbata
D	1b		283674	BOLD:ABU8864	40	6	6	10	85	10514312	203.55	40.046	203.55	99.7557	SYS-CRLNONINSECTARTH	Arthropoda	Branchiopoda	Anomopoda	Daphniidae		Simocephalus	Simocephalus vetulus, Simocephalus exspinosus
D	1b		283674	BOLD:AAZ4042	40	8	8	7	80	10514312	202.975	39.1067	202.975	99.4893	SYS-CRLCHORDATA	Chordata	Mammalia	Rodentia	Myocastoridae		Myocastor	Myocastor coypus
D	1b		283674	BOLD:ADJ9286	42	9	9	63	78.5714	10514312	203.333	33.4187	203.333	99.9765	SYS-CRLINSECTA	Arthropoda	Insecta	Diptera	Chironomidae	Orthocladiinae	Nanocladius	Nanocladius dichromus
D	1b		283674	BOLD:AAL1506	44	12	12	20	72.7273	10514312	202.523	34.9628	202.523	99.9438	SYS-CRLNONARTHINVERT	Annelida	Clitellata	Haplotaxida	Naididae	Naidinae	Dero	Dero sp. 1 AEB-2009, Dero sp. Jemmerson Slough-AEB-2002
D	1b		283674	BOLD:ADU2111	45	17	17	62	62.2222	10514312	202.111	34.5041	202.111	98.5609	SYS-CRLINSECTA	Arthropoda	Insecta	Diptera
D	1b		283674	BOLD:ADX1082	46	16	16	19	65.2174	10514312	202.022	37.2685	202.022	98.9474	SYS-CRLNONARTHINVERT	Annelida	Clitellata	Enchytraeida	Randiellidae		Ilyodrilus	Ilyodrilus templetoni
D	1b		283674	BOLD:ACW0481	47	16	16	18	65.9574	10514312	199.128	39.6855	199.149	100	SYS-CRLNONARTHINVERT	Annelida	Clitellata	Haplotaxida	Naididae	Tubificinae	Limnodrilus	Limnodrilus claparedianus, Limnodrilus claparedeanus
D	1b		283674	BOLD:AAW4936	48	13	13	60	72.9167	10514312	202.312	35.0842	202.312	99.723	SYS-CRLINSECTA	Arthropoda	Insecta	Diptera	Chironomidae	Chironominae	Cryptochironomus	Cryptochironomus obreptans, Cryptochironomus supplicans
D	1b		283674	BOLD:ACG9929	48	14	14	60	70.8333	10514312	202.333	33.7756	202.333	99.9592	SYS-CRLINSECTA	Arthropoda	Insecta	Diptera	Chironomidae	Chironominae	Tanytarsus	Tanytarsus medius
D	1b		283674	BOLD:AAI6827	50	25	25	59	50	10514312	199.4	44.9782	199.4	98.8218	SYS-CRLINSECTA	Arthropoda	Insecta	Ephemeroptera	Caenidae	Caeninae	Caenis	Caenis horaria
D	1b		283674	BOLD:AAU0274	51	8	8	58	84.3137	10514312	203.706	35.9135	203.706	99.9802	SYS-CRLINSECTA	Arthropoda	Insecta	Diptera	Chironomidae	Orthocladiinae	Psectrocladius	Psectrocladius limbatellus
D	1b		283674	BOLD:AAJ4282	52	14	14	56	73.0769	10514312	203.538	34.7966	203.538	99.6793	SYS-CRLINSECTA	Arthropoda	Insecta	Diptera	Chironomidae	Chironominae	Chironomus	Chironomus nr. riparius, Chironomus cf. aprilinus, Chironomus nr. pseudothummi, Chironomus luridus
D	1b		283674	BOLD:ACX2014	52	8	8	56	84.6154	10514312	204.404	32.7787	204.404	97.9961	SYS-CRLINSECTA	Arthropoda	Insecta	Diptera	Chironomidae	Chironominae	Tanytarsus	Tanytarsus mendax
D	1b		283674	BOLD:ADJ7241	58	17	17	17	70.6897	10514312	202.224	40.3829	202.224	98.9589	SYS-CRLNONARTHINVERT	Annelida	Clitellata	Haplotaxida
D	1b		283674	BOLD:ACK3819	60	16	16	55	73.3333	10514312	203.733	32.8921	203.733	99.4611	SYS-CRLINSECTA	Arthropoda	Insecta	Diptera	Chironomidae	Tanypodinae	Psectrotanypus	Psectrotanypus varius
D	1b		283674	BOLD:ACQ7220	61	18	18	16	70.4918	10514312	202.295	36.1083	202.295	99.9149	SYS-CRLNONARTHINVERT	Annelida	Clitellata	Haplotaxida	Naididae	Tubificinae	Psammoryctides	Psammoryctides barbatus
D	1b		283674	BOLD:AAU2239	66	12	12	54	81.8182	10514312	202.879	35.0995	202.879	99.9102	SYS-CRLINSECTA	Arthropoda	Insecta	Diptera	Chironomidae	Chironominae	Cladotanytarsus, Chironomus	Chironomus tentans, Cladotanytarsus atridorsum, Chironomus plumosus, Chironomus usenicus
D	1b		283674	BOLD:AAY9630	68	18	18	53	73.5294	10514312	204.044	32.1007	204.044	98.9404	SYS-CRLINSECTA	Arthropoda	Insecta	Diptera	Ceratopogonidae	Ceratopogoninae	Culicoides	Culicoides segnis
D	1b		283674	BOLD:ACP6608	70	16	16	52	77.1429	10514312	170.557	32.6629	203.043	98.3531	SYS-CRLINSECTA	Arthropoda	Insecta	Diptera	Chironomidae	Tanypodinae	Tanypus	Tanypus kraatzi
D	1b		283674	BOLD:ACY3855	73	28	28	51	61.6438	10514312	199.685	30.8513	199.685	99.5085	SYS-CRLINSECTA	Arthropoda	Insecta	Diptera	Chironomidae	Chironominae	Pentapedilum, Polypedilum	Polypedilum sordens, Pentapedilum sordens
D	1b		283674	BOLD:ACK9434	76	19	19	50	75	10514312	203.684	30.6739	203.684	98.4691	SYS-CRLINSECTA	Arthropoda	Insecta	Hemiptera	Cicadellidae	Macropsinae	Macropsis	Macropsis ocellata
D	1b		283674	BOLD:ACM1671	77	19	19	49	75.3247	10514312	200.532	31.9914	200.532	98.3251	SYS-CRLINSECTA	Arthropoda	Insecta	Diptera	Chironomidae	Chironominae	Tanytarsus
D	1b		283674	BOLD:ADC8854	81	28	28	6	65.4321	10514312	198.63	45.7524	198.654	99.5435	SYS-CRLCHORDATA	Chordata	Actinopterygii	Anguilliformes	Anguillidae		Anguilla	Anguilla anguilla, Anguilla rostrata
D	1b		283674	BOLD:AAU4046	84	14	14	48	83.3333	10514312	202.702	36.5953	202.69	99.9588	SYS-CRLINSECTA	Arthropoda	Insecta	Diptera	Chironomidae	Chironominae	Chironomus	Chironomus melanotus, Chironomus annularius
D	1b		283674	BOLD:ACZ8808	86	20	20	47	76.7442	10514312	204.151	35.3837	204.151	99.8807	SYS-CRLINSECTA	Arthropoda	Insecta	Diptera	Chironomidae	Chironominae	Cladotanytarsus	Cladotanytarsus bicornutus, Cladotanytarsus wexionensis
D	1b		283674	BOLD:AAW4848	90	16	16	46	82.2222	10514312	202.7	32.4166	202.7	99.7051	SYS-CRLINSECTA	Arthropoda	Insecta	Diptera	Chironomidae	Chironominae	Parachironomus	Parachironomus parilis
D	1b		283674	BOLD:AAA6805	93	31	31	15	66.6667	10514312	203.634	37.9756	203.634	99.5829	SYS-CRLNONARTHINVERT	Annelida	Clitellata	Haplotaxida	Naididae	Tubificinae	Tubifex	Tubifex tubifex
D	1b		283674	BOLD:AAF3606	94	18	18	14	80.8511	10514312	203.84	34.0672	203.84	99.937	SYS-CRLNONARTHINVERT	Annelida	Clitellata	Haplotaxida	Naididae	Naidinae	Stylaria	Stylaria lacustris
D	1b		283674	BOLD:AAN1000	95	38	38	45	60	10514312	199.653	46.8208	199.653	99.7652	SYS-CRLINSECTA	Arthropoda	Insecta	Ephemeroptera	Caenidae	Caeninae	Caenis	Caenis luctuosa
D	1b		283674	BOLD:AAX0441	96	21	21	13	78.125	10514312	202.719	35.2511	202.719	99.9743	SYS-CRLNONARTHINVERT	Annelida	Clitellata	Haplotaxida	Naididae	Naidinae	Ophidonais	Ophidonais serpentina
D	1b		283674	BOLD:AAV7098	105	32	32	44	69.5238	10514312	203.676	34.9824	203.676	99.4808	SYS-CRLINSECTA	Arthropoda	Insecta	Diptera	Chironomidae	Chironominae	Tanytarsus	Tanytarsus occultus, Tanytarsus NHRS sp. A
D	1b		283674	BOLD:ACZ2251	106	31	31	9	70.7547	10514312	202.434	36.2401	202.434	98.1419	SYS-CRLNONINSECTARTH	Arthropoda	Collembola	Symphypleona	Sminthurididae
D	1b		283674	BOLD:ACI0505	108	14	14	12	87.037	10514312	202.519	31.019	202.5	97.5224	SYS-CRLNONARTHINVERT	Mollusca	Gastropoda		Lymnaeidae		Radix	Radix cf. auricularia, Radix sp. clade 1 CC-2016, Radix auricularia
D	1b		283674	BOLD:AAP9060	109	23	23	43	78.8991	10514312	203.716	32.4386	203.716	99.9362	SYS-CRLINSECTA	Arthropoda	Insecta	Diptera	Ceratopogonidae	Ceratopogoninae	Palpomyia	Palpomyia lineata
D	1b		283674	BOLD:ADR2107	110	34	34	11	69.0909	10514312	201.155	38.9088	201.155	98.6896	SYS-CRLNONARTHINVERT	Annelida	Clitellata	Haplotaxida	Naididae	Tubificinae	Limnodrilus	Limnodrilus udekemianus
D	1b		283674	BOLD:AAE9024	110	23	23	42	79.0909	10514312	203.536	33.8243	203.536	99.7119	SYS-CRLINSECTA	Arthropoda	Insecta	Diptera	Chironomidae	Chironominae	Chironomus	Chironomus tentans, Chironomus pallidivittatus
D	1b		283674	BOLD:ADA4951	127	23	23	41	81.8898	10514312	203.756	29.228	203.756	99.8547	SYS-CRLINSECTA	Arthropoda	Insecta	Diptera	Chironomidae	Chironominae	Tanytarsus	Tanytarsus verralli
D	1b		283674	BOLD:ADG7137	130	31	31	10	76.1538	10514312	203.408	36.738	203.408	99.6902	SYS-CRLNONARTHINVERT	Annelida	Clitellata	Haplotaxida	Naididae	Tubificinae	Potamothrix	Potamothrix sp.
D	1b		283674	BOLD:AAW3990	131	21	21	40	83.9695	10514312	202.969	35.5772	202.969	99.9624	SYS-CRLINSECTA	Arthropoda	Insecta	Diptera	Chironomidae	Chironominae	Chironomus	Chironomus balatonicus, Chironomus cf. nudiventris, Chironomus plumosus
D	1b		283674	BOLD:ACB9761	136	30	30	9	77.9412	10514312	202.471	28.1913	202.485	98.9431	SYS-CRLNONARTHINVERT	Rotifera	Bdelloidea	Bdelloidea_order_incertae_sedis	Philodinidae		Rotaria	Rotaria rotatoria
D	1b		283674	BOLD:ACD8415	140	34	34	39	75.7143	10514312	202.014	34.5196	202.021	99.835	SYS-CRLINSECTA	Arthropoda	Insecta	Diptera	Chironomidae	Chironominae	Chironomus	Chironomus NHRS sp. B, Chironomus nuditarsis, Chironomus curabilis
D	1b		283674	BOLD:AAD6712	156	35	35	8	77.5641	10514312	200.821	31.465	203.032	99.8635	SYS-CRLNONARTHINVERT	Mollusca	Gastropoda		Lymnaeidae		Radix	Radix sp. MOTU 4, Radix sp., Radix auricularia, Radix sp. KIE1, Radix zue
D	1b		283674	BOLD:AAP7166	164	30	30	38	81.7073	10514312	203.061	30.3612	203.061	99.1065	SYS-CRLINSECTA	Arthropoda	Insecta	Diptera	Chironomidae	Chironominae	Tanytarsus	Tanytarsus usmaensis
D	1b		283674	BOLD:ADJ7242	166	37	37	7	77.7108	10514312	202.94	37.6761	202.94	99.914	SYS-CRLNONARTHINVERT	Annelida	Clitellata	Haplotaxida	Naididae	Tubificinae	Limnodrilus	Limnodrilus claparedianus
D	1b		283674	BOLD:AAA3964	168	42	42	4	75	10514312	200.476	42.0846	200.476	99.9413	SYS-CRLCHORDATA	Chordata	Mammalia	Rodentia	Muridae	Murinae	Mus	Mus musculus, Mus musculus C57BL/6J, Mus macedonicus
D	1b		283674	BOLD:ACR8614	175	17	17	37	90.2857	10514312	203.829	32.9513	203.829	99.9672	SYS-CRLINSECTA	Arthropoda	Insecta	Diptera	Chironomidae	Chironominae	Cladotanytarsus	Cladotanytarsus mancus sp. 2TE
D	1b		283674	BOLD:ACR9864	178	26	26	8	85.3933	10514312	201.5	32.2513	201.5	99.9423	SYS-CRLNONINSECTARTH	Arthropoda	Arachnida	Trombidiformes	Pionidae	Pioninae	Piona	Piona carnea
D	1b		283674	BOLD:ACR8610	181	25	25	36	86.1878	10514312	202.878	34.4164	202.878	99.8585	SYS-CRLINSECTA	Arthropoda	Insecta	Diptera	Chironomidae	Chironominae	Cladotanytarsus	Cladotanytarsus mancus
D	1b		283674	BOLD:AAU2145	190	32	32	35	83.1579	10514312	203.2	33.6316	203.2	99.8996	SYS-CRLINSECTA	Arthropoda	Insecta	Diptera	Chironomidae	Orthocladiinae	Cricotopus	Cricotopus intersectus
D	1b		283674	BOLD:ADL1458	192	40	40	34	79.1667	10514312	202.083	31.9433	202.083	98.3958	SYS-CRLINSECTA	Arthropoda	Insecta	Diptera	Chironomidae	Orthocladiinae	Cricotopus	Cricotopus ornatus
D	1b		283674	BOLD:ACX3166	211	43	43	33	79.6209	10514312	202.166	38.2652	202.166	99.4199	SYS-CRLINSECTA	Arthropoda	Insecta	Diptera	Ceratopogonidae	Ceratopogoninae	Probezzia	Probezzia seminigra
D	1b		283674	BOLD:ABV1930	213	36	36	6	83.0986	10514312	202.704	42.0846	202.704	99.7649	SYS-CRLNONARTHINVERT	Annelida	Clitellata	Haplotaxida	Naididae	Tubificinae	Limnodrilus	Limnodrilus hoffmeisteri, Limnodrilus hoffmeisteri X, Limnodrilus hoffmeisteri_X
D	1b		283674	BOLD:ADJ7243	214	45	45	5	78.972	10514312	201.654	38.2662	201.687	99.9606	SYS-CRLNONARTHINVERT	Annelida	Clitellata	Haplotaxida	Naididae	Tubificinae	Limnodrilus	Limnodrilus claparedianus
D	1b		283674	BOLD:ACS0354	223	41	41	7	81.6143	10514312	202.197	32.6353	202.197	99.9292	SYS-CRLNONINSECTARTH	Arthropoda	Arachnida	Trombidiformes	Hydrodromidae		Hydrodroma	Hydrodroma despiciens
D	1b		283674	BOLD:ADL1113	224	33	33	32	85.2679	10514312	201.464	33.5777	201.473	98.6045	SYS-CRLINSECTA	Arthropoda	Insecta	Diptera	Chironomidae	Chironominae	Polypedilum	Polypedilum nubeculosum
D	1b		283674	BOLD:ACY8157	230	54	54	31	76.5217	10514312	202.865	32.2354	202.865	98.989	SYS-CRLINSECTA	Arthropoda	Insecta	Diptera	Chironomidae	Chironominae	Tanytarsus	Tanytarsus usmaensis
D	1b		283674	BOLD:ABZ5549	231	44	44	30	80.9524	10514312	203.346	37.7592	203.351	99.2137	SYS-CRLINSECTA	Arthropoda	Insecta	Diptera	Chironomidae	Orthocladiinae	Psectrocladius	Psectrocladius limbatellus, Psectrocladius ventricosus
D	1b		283674	BOLD:ACX4028	235	31	31	29	86.8085	10514312	203.447	37.7128	203.447	99.4928	SYS-CRLINSECTA	Arthropoda	Insecta	Diptera	Ceratopogonidae	Ceratopogoninae	Probezzia	Probezzia seminigra
D	1b		283674	BOLD:ACB9673	248	40	40	28	83.871	10514312	202.266	30.0905	202.27	97.9531	SYS-CRLINSECTA	Arthropoda	Insecta	Diptera	Chironomidae	Chironominae	Tanytarsus
D	1b		283674	BOLD:AAA3774	254	48	48	27	81.1024	10514312	203.091	33.8805	203.083	99.5462	SYS-CRLINSECTA	Arthropoda	Insecta	Diptera	Chironomidae	Chironominae	Tanytarsus	Tanytarsus mendax
D	1b		283674	BOLD:AAV8406	269	36	36	26	86.6171	10514312	201.665	31.6016	201.669	98.1175	SYS-CRLINSECTA	Arthropoda	Insecta	Diptera	Chironomidae	Chironominae	Tanytarsus	Tanytarsus verralli
D	1b		283674	BOLD:ACK5400	281	40	40	4	85.7651	10514312	203.014	39.4525	203.014	99.954	SYS-CRLNONARTHINVERT	Annelida	Clitellata	Haplotaxida	Naididae	Tubificinae	Potamothrix	Potamothrix moldaviensis
D	1b		283674	BOLD:ACX3165	297	50	50	24	83.165	10514312	202.949	36.1897	202.956	99.9557	SYS-CRLINSECTA	Arthropoda	Insecta	Diptera	Ceratopogonidae	Ceratopogoninae	Probezzia	Probezzia seminigra
D	1b		283674	BOLD:AEB2426	297	57	57	24	80.8081	10514312	204.222	34.0469	204.222	99.4789	SYS-CRLINSECTA	Arthropoda	Insecta	Diptera	Chironomidae	Chironominae	Polypedilum	Polypedilum nubeculosum
D	1b		283674	BOLD:ACS6392	317	46	46	23	85.489	10514312	203.082	32.8127	203.085	99.9457	SYS-CRLINSECTA	Arthropoda	Insecta	Diptera	Chironomidae	Orthocladiinae	Cricotopus	Cricotopus intersectus
D	1b		283674	BOLD:ABZ9874	342	72	72	6	78.9474	10514312	201.699	40.4652	201.699	99.7981	SYS-CRLNONINSECTARTH	Arthropoda	Ostracoda	Podocopida	Candonidae		Pseudocandona	Pseudocandona compressa
D	1b		283674	BOLD:AAU1200	346	56	56	22	83.815	10514312	203.321	30.0439	203.321	99.6009	SYS-CRLINSECTA	Arthropoda	Insecta	Diptera	Chironomidae	Chironominae	Chironomus, Paratanytarsus	Chironomus plumosus, Paratanytarsus inopertus
D	1b		283674	BOLD:ADK1445	365	59	59	21	83.8356	10514312	202.479	30.6889	202.479	99.6042	SYS-CRLINSECTA	Arthropoda	Insecta	Diptera	Chironomidae	Chironominae	Tanytarsus	Tanytarsus verralli
D	1b		283674	BOLD:ACM0527	376	49	49	5	86.9681	10514312	202.904	31.8973	202.904	98.5388	SYS-CRLNONINSECTARTH	Arthropoda	Arachnida	Trombidiformes	Pionidae
D	1b		283674	BOLD:ADF1572	401	55	55	20	86.2843	10514312	202.214	36.355	202.214	98.7195	SYS-CRLINSECTA	Arthropoda	Insecta	Diptera	Chironomidae	Chironominae	Chironomus	Chironomus plumosus
D	1b		283674	BOLD:AAC7275	402	112	112	3	72.1393	10514312	196.152	50.3132	196.149	99.6682	SYS-CRLCHORDATA	Chordata	Aves	Anseriformes	Anatidae		Anser	Anser fabalis, Anser erythropus, Anser brachyrhynchus, Anser cygnoides, Anser albifrons, Anser caerulescens, Anser anser, Anser sp., Anser indicus, Anser canagicus, Anser rossii
D	1b		283674	BOLD:ACV8313	403	91	91	3	77.4194	10514312	199.377	45.5622	199.377	99.7073	SYS-CRLNONARTHINVERT	Annelida	Clitellata	Haplotaxida	Naididae	Rhyacodrilinae	Bothrioneurum	Bothrioneurum vejdovskyanum
D	1b		283674	BOLD:AAD3373	446	94	94	2	78.9238	10514312	199.045	48.4004	199.045	99.455	SYS-CRLCHORDATA	Chordata	Aves	Gruiformes	Rallidae		Fulica	Fulica atra
D	1b		283674	BOLD:AEC3112	484	80	80	4	83.4711	10514312	202.322	32.7425	202.337	98.6179	SYS-CRLNONINSECTARTH	Arthropoda	Arachnida	Trombidiformes	Unionicolidae	Pionatacinae	Neumania
D	1b		283674	BOLD:AAP5876	517	70	70	19	86.4603	10514312	203.253	32.4865	203.253	99.8711	SYS-CRLINSECTA	Arthropoda	Insecta	Diptera	Chironomidae	Chironominae	Tanytarsus	Tanytarsus telmaticus, Tanytarsus lestagei
D	1b		283674	BOLD:ACW5385	529	84	84	18	84.121	10514312	203.348	32.481	203.35	99.9495	SYS-CRLINSECTA	Arthropoda	Insecta	Diptera	Chironomidae	Tanypodinae	Procladius	Procladius culiciformis, Procladius sagittalis, Procladius pectinatus
D	1b		283674	BOLD:AEB6122	559	75	75	2	86.5832	10514312	202.996	37.9788	202.996	99.2977	SYS-CRLNONARTHINVERT	Annelida	Clitellata	Haplotaxida	Naididae	Tubificinae	Tubifex	Tubifex tubifex
D	1b		283674	BOLD:AAV9062	593	103	103	17	82.6307	10514312	202.734	30.924	202.734	99.6782	SYS-CRLINSECTA	Arthropoda	Insecta	Diptera	Chironomidae	Orthocladiinae	Cricotopus	Cricotopus arcuatus, Cricotopus intersectus, Cricotopus laricomalis
D	1b		283674	BOLD:ADD6917	619	79	79	3	87.2375	10514312	203.273	36.3152	203.149	99.2149	SYS-CRLNONINSECTARTH	Arthropoda	Branchiopoda	Anomopoda	Eurycercidae		Eurycercus	Eurycercus lamellatus
D	1b		283674	BOLD:AAA5299	687	94	94	16	86.3173	10514312	203.553	32.5856	203.553	99.2473	SYS-CRLINSECTA	Arthropoda	Insecta	Diptera	Chironomidae	Orthocladiinae	Cricotopus	Cricotopus laetus, Cricotopus relucens, Cricotopus sp., Cricotopus sp. 3ES, Cricotopus sylvestris, Cricotopus glacialis
D	1b		283674	BOLD:ADF2204	705	91	91	15	87.0922	10514312	203.121	34.127	203.119	99.6643	SYS-CRLINSECTA	Arthropoda	Insecta	Diptera	Chironomidae	Chironominae	Cladotanytarsus	Cladotanytarsus mancus
D	1b		283674	BOLD:AAF2659	740	94	94	2	87.2973	10514312	202.897	38.409	202.899	99.6092	SYS-CRLNONINSECTARTH	Arthropoda	Branchiopoda	Anomopoda	Chydoridae	Chydorinae	Chydorus	Chydorus cf. sphaericus, Chydorus sphaericus, Chydorus Sphaericus
D	1b		283674	BOLD:AAP5926	943	176	176	14	81.3362	10514312	202.727	31.3347	202.727	99.0567	SYS-CRLINSECTA	Arthropoda	Insecta	Diptera	Chironomidae	Orthocladiinae	Cricotopus	Cricotopus ornatus
D	1b		283674	BOLD:AAK9986	1007	114	114	13	88.6792	10514312	203.048	31.9066	203.048	99.8612	SYS-CRLINSECTA	Arthropoda	Insecta	Diptera	Chironomidae	Orthocladiinae	Psectrocladius	Psectrocladius limbatellus, Psectrocladius sp. 4TE, Psectrocladius sordidellus
D	1b		283674	BOLD:AAK6479	1018	149	149	12	85.3635	10514312	198.199	37.9662	201.586	99.9479	SYS-CRLINSECTA	Arthropoda	Insecta	Hemiptera	Corixidae	Micronectinae	Micronecta	Micronecta scholtzi
D	1b		283674	BOLD:ADA4952	1138	146	146	11	87.1705	10514312	202.894	30.3928	202.893	99.6808	SYS-CRLINSECTA	Arthropoda	Insecta	Diptera	Chironomidae	Chironominae	Tanytarsus	Tanytarsus verralli
D	1b		283674	BOLD:AAM6003	1203	152	152	10	87.3649	10514312	203.436	36.0134	203.436	99.7805	SYS-CRLINSECTA	Arthropoda	Insecta	Diptera	Chironomidae	Chironominae	Dicrotendipes	Dicrotendipes pulsus, Dicrotendipes modestus
D	1b		283674	BOLD:ACB9674	1271	159	159	9	87.4902	10514312	201.101	31.6544	201.1	99.7859	SYS-CRLINSECTA	Arthropoda	Insecta	Diptera	Chironomidae	Chironominae	Tanytarsus	Tanytarsus verralli
D	1b		283674	BOLD:ACV9616	1652	256	256	1	84.5036	10514312	202.176	39.0661	202.175	99.7365	SYS-CRLNONARTHINVERT	Annelida	Clitellata	Haplotaxida	Naididae	Tubificinae	Limnodrilus
D	1b		283674	BOLD:AAX2700	1886	205	205	8	89.1304	10514312	203.641	33.575	203.642	98.9749	SYS-CRLINSECTA	Arthropoda	Insecta	Diptera	Chironomidae	Chironominae	Parachironomus	Parachironomus gracilior
D	1b		283674	BOLD:AAY3395	2299	425	425	7	81.5137	10514312	202.435	33.0361	202.441	99.3107	SYS-CRLINSECTA	Arthropoda	Insecta	Diptera	Chironomidae	Chironominae	Polypedilum	Polypedilum nubeculosum
D	1b		283674	BOLD:AAJ3263	2653	381	381	6	85.6389	10514312	203.077	35.3293	203.077	99.0781	SYS-CRLINSECTA	Arthropoda	Insecta	Diptera	Chironomidae	Chironominae	Cladotanytarsus	Cladotanytarsus atridorsum
D	1b		283674	BOLD:AAG5527	3127	285	285	5	90.8858	10514312	202.836	30.9964	202.836	99.7081	SYS-CRLINSECTA	Arthropoda	Insecta	Diptera	Chironomidae	Tanypodinae	Procladius	Procladius rufovittatus
D	1b		283674	BOLD:AAQ0622	4282	457	457	4	89.3274	10514312	203.345	29.8132	203.346	99.4816	SYS-CRLINSECTA	Arthropoda	Insecta	Diptera	Chironomidae	Chironominae	Tanytarsus	Tanytarsus verralli
D	1b		283674	BOLD:AAA7175	4407	613	613	1	86.0903	10514312	196.047	46.0848	196.047	99.4972	SYS-CRLCHORDATA	Chordata	Actinopterygii	Cypriniformes	Cyprinidae	Cyprininae	Cyprinus	Cyprinus rubrofuscus, Procypris mera, Cyprinus carpio x Procypris rabaudi, Carassius auratus, Cyprinus intha, Cyprinus acutidorsalis, Cyprinus carpio Furong x Carassius auratus red var., Cyprinus carpio wuyuanensis x Carassius auratus, Cyprinus carpio, Cyprinus multitaeniata, Cyprinus megalophthalmus, Cyprinus carpio specularis x Carassius cuvieri, Cyprinus pellegrini, Labeo calbasu
D	1b		283674	BOLD:ABZ9053	5589	620	620	1	88.9068	10514312	202.649	38.7329	202.649	98.8866	SYS-CRLNONINSECTARTH	Arthropoda	Ostracoda	Podocopida	Limnocytheridae		Limnocythere	Limnocythere inopinata
D	1b		283674	BOLD:ACD4470	6382	667	667	3	89.5487	10514312	202.513	35.9236	202.513	99.859	SYS-CRLINSECTA	Arthropoda	Insecta	Diptera	Chironomidae	Chironominae	Glyptotendipes	Glyptotendipes glacus, Glyptotendipes pallens, Glyptotendipes nr. paripes
D	1b		283674	BOLD:ACB8413	10124	1123	1123	2	88.9075	10514312	203.129	34.9318	203.129	99.7809	SYS-CRLINSECTA	Arthropoda	Insecta	Diptera	Chaoboridae	Chaoborinae	Chaoborus	Chaoborus flavicans
D	1b		283674	BOLD:AEC3568	65659	5226	5226	1	92.0407	10514312	203.27	32.4075	203.273	99.6891	SYS-CRLINSECTA	Arthropoda	Insecta	Diptera	Chironomidae	Orthocladiinae	Cricotopus	Cricotopus intersectus, Cricotopus laricomalis
E	2		225890	BOLD:AAA5988	3	3	3	8	0	8924410	202.333	41.3727	202.333	99.8366	SYS-CRLCHORDATA	Chordata	Actinopterygii	Esociformes	Esocidae		Esox	Esox lucius, Esox cisalpinus
E	2		225890	BOLD:ACI1944	4	4	4	18	0	8924410	202.75	39.2215	202.75	100	SYS-CRLNONARTHINVERT	Annelida	Clitellata	Haplotaxida	Naididae	Tubificinae	Tubifex, Potamothrix	Potamothrix bavaricus, Tubifex tubifex
E	2		225890	BOLD:ADD6917	4	4	4	12	0	8924410	203.25	36.533	203.25	99.0147	SYS-CRLNONINSECTARTH	Arthropoda	Branchiopoda	Anomopoda	Eurycercidae		Eurycercus	Eurycercus lamellatus
E	2		225890	BOLD:ACX3166	4	4	4	13	0	8924410	203.75	37.7907	203.75	99.2629	SYS-CRLINSECTA	Arthropoda	Insecta	Diptera	Ceratopogonidae	Ceratopogoninae	Probezzia	Probezzia seminigra
E	2		225890	BOLD:AAX9262	4	4	4	12	0	8924410	203.25	40.9605	203.25	98.5233	SYS-CRLNONINSECTARTH	Arthropoda	Malacostraca	Amphipoda	Gammaridae		Dikerogammarus	Dikerogammarus haemobaphes
E	2		225890	BOLD:ACI0505	5	2	2	17	60	8924410	202.6	30.6032	202.6	97.0384	SYS-CRLNONARTHINVERT	Mollusca	Gastropoda		Lymnaeidae		Radix	Radix cf. auricularia, Radix sp. clade 1 CC-2016, Radix auricularia
E	2		225890	BOLD:ADR6425	6	5	5	14	16.6667	8924410	200.833	42.2449	200.833	99.7524	SYS-CRLNONARTHINVERT	Annelida	Clitellata	Haplotaxida	Naididae	Tubificinae	Aulodrilus	Aulodrilus pluriseta
E	2		225890	BOLD:AAB1238	6	4	4	14	33.3333	8924410	204	37.0116	204	100	SYS-CRLNONARTHINVERT	Annelida	Clitellata	Lumbriculida	Lumbriculidae		Lumbriculus	Lumbriculus variegatus_I, Lumbriculus variegatus
E	2		225890	BOLD:ADP7773	6	2	2	11	66.6667	8924410	204.333	41.1095	204.333	97.0636	SYS-CRLNONINSECTARTH	Arthropoda	Malacostraca	Amphipoda	Gammaridae		Gammarus	Gammarus tigrinus
E	2		225890	BOLD:AAB0356	6	6	6	7	0	8924410	199.167	44.3322	199.167	99.9104	SYS-CRLCHORDATA	Chordata	Actinopterygii	Perciformes	Percidae	Percinae	Perca	Perca fluviatilis
E	2		225890	BOLD:AAD6712	6	3	3	14	50	8924410	204.167	31.347	204.167	99.9183	SYS-CRLNONARTHINVERT	Mollusca	Gastropoda		Lymnaeidae		Radix	Radix sp. MOTU 4, Radix sp., Radix auricularia, Radix sp. KIE1, Radix zue
E	2		225890	BOLD:AAP5876	9	5	5	12	44.4444	8924410	204	31.9184	204	99.4553	SYS-CRLINSECTA	Arthropoda	Insecta	Diptera	Chironomidae	Chironominae	Tanytarsus	Tanytarsus telmaticus, Tanytarsus lestagei
E	2		225890	BOLD:ADP7774	10	6	6	10	40	8924410	202.6	40.0374	202.6	98.3127	SYS-CRLNONINSECTARTH	Arthropoda	Malacostraca	Amphipoda	Gammaridae		Gammarus	Gammarus tigrinus
E	2		225890	BOLD:AAA1616	10	8	8	6	20	8924410	202.1	42.9077	202.1	98.7143	SYS-CRLCHORDATA	Chordata	Mammalia	Rodentia	Cricetidae	Arvicolinae	Microtus	Microtus gregalis, Myodes glareolus, Microtus oeconomus, Microtus arvalis, Microtus agrestis
E	2		225890	BOLD:AAC3994	11	5	5	9	54.5455	8924410	201.273	38.716	201.091	99.4089	SYS-CRLNONINSECTARTH	Arthropoda	Branchiopoda	Anomopoda	Eurycercidae		Eurycercus	Eurycercus lamellatus
E	2		225890	BOLD:ADD9335	12	5	5	8	58.3333	8924410	204.833	37.5405	204.667	99.9185	SYS-CRLNONINSECTARTH	Arthropoda	Branchiopoda	Anomopoda	Eurycercidae		Eurycercus	Eurycercus cf. lamellatus
E	2		225890	BOLD:AEA8437	12	6	6	13	50	8924410	204.25	44.9245	204.25	99.3866	SYS-CRLNONARTHINVERT	Gastrotricha	Gastrotricha_class_incertae_sedis	Chaetonotida	Chaetonotidae		Heterolepidoderma	Heterolepidoderma macrops
E	2		225890	BOLD:AAA7350	15	6	6	5	60	8924410	200.6	42.2367	200.6	99.9315	SYS-CRLCHORDATA	Chordata	Actinopterygii	Cypriniformes	Cyprinidae	Tincinae	Tinca	Tinca tinca
E	2		225890	BOLD:AAI9938	17	13	13	7	23.5294	8924410	197.882	36.9647	197.882	99.7608	SYS-CRLNONINSECTARTH	Arthropoda	Malacostraca	Amphipoda	Gammaridae		Dikerogammarus	Dikerogammarus sp., Dikerogammarus villosus
E	2		225890	BOLD:AAB2046	20	9	9	4	55	8924410	202.95	45.4159	202.95	99.9252	SYS-CRLCHORDATA	Chordata	Actinopterygii	Gadiformes	Gadidae	Lotinae	Lota	Lota lota
E	2		225890	BOLD:AAX2382	20	4	4	12	80	8924410	204.6	30.2543	204.6	98.5337	SYS-CRLNONARTHINVERT	Cnidaria	Hydrozoa	Anthoathecata	Hydridae		Hydra	Hydra circumcincta
E	2		225890	BOLD:AAG5499	22	5	5	11	77.2727	8924410	191.455	33.3428	203.955	98.7056	SYS-CRLINSECTA	Arthropoda	Insecta	Diptera	Chironomidae	Orthocladiinae	Psectrocladius	Psectrocladius obvius, Psectrocladius platypus
E	2		225890	BOLD:AAM6003	27	8	8	10	70.3704	8924410	203.444	35.8435	203.444	99.9437	SYS-CRLINSECTA	Arthropoda	Insecta	Diptera	Chironomidae	Chironominae	Dicrotendipes	Dicrotendipes pulsus, Dicrotendipes modestus
E	2		225890	BOLD:AAE4280	28	16	16	6	42.8571	8924410	200.857	37.7781	200.857	99.5382	SYS-CRLNONINSECTARTH	Arthropoda	Branchiopoda	Anomopoda	Chydoridae	Aloninae	Monospilus	Monospilus dispar
E	2		225890	BOLD:AAU0274	34	15	15	9	55.8824	8924410	199.206	35.3535	199.206	99.4811	SYS-CRLINSECTA	Arthropoda	Insecta	Diptera	Chironomidae	Orthocladiinae	Psectrocladius	Psectrocladius limbatellus
E	2		225890	BOLD:ABZ9874	38	11	11	5	71.0526	8924410	201.105	40.4091	201.105	99.9643	SYS-CRLNONINSECTARTH	Arthropoda	Ostracoda	Podocopida	Candonidae		Pseudocandona	Pseudocandona compressa
E	2		225890	BOLD:ACA9131	40	7	7	11	82.5	8924410	203.85	36.388	203.85	97.8079	SYS-CRLNONARTHINVERT	Annelida	Clitellata	Haplotaxida	Naididae	Naidinae	Uncinais	Uncinais uncinata
E	2		225890	BOLD:AAA7175	40	20	20	3	50	8924410	195.975	45.9257	195.975	99.3693	SYS-CRLCHORDATA	Chordata	Actinopterygii	Cypriniformes	Cyprinidae	Cyprininae	Cyprinus	Cyprinus rubrofuscus, Procypris mera, Cyprinus carpio x Procypris rabaudi, Carassius auratus, Cyprinus intha, Cyprinus acutidorsalis, Cyprinus carpio Furong x Carassius auratus red var., Cyprinus carpio wuyuanensis x Carassius auratus, Cyprinus carpio, Cyprinus multitaeniata, Cyprinus megalophthalmus, Cyprinus carpio specularis x Carassius cuvieri, Cyprinus pellegrini, Labeo calbasu
E	2		225890	BOLD:AAN3084	45	12	12	10	73.3333	8924410	203.511	34.3157	203.511	99.9451	SYS-CRLNONARTHINVERT	Mollusca	Gastropoda	Littorinimorpha	Bithyniidae		Bithynia	Bithynia tentaculata
E	2		225890	BOLD:AAH8003	46	10	10	8	78.2609	8924410	203.674	30.493	203.674	99.9459	SYS-CRLINSECTA	Arthropoda	Insecta	Trichoptera	Leptoceridae	Leptocerinae	Triaenodes	Triaenodes unanimis
E	2		225890	BOLD:ADD8317	48	9	9	4	81.25	8924410	200.458	36.8569	200.458	98.5085	SYS-CRLNONINSECTARTH	Arthropoda	Branchiopoda	Anomopoda	Chydoridae	Aloninae	Acroperus	Acroperus cf. harpae, Acroperus harpae
E	2		225890	BOLD:AAJ0256	51	17	17	9	66.6667	8924410	202.863	33.5983	202.863	99.8841	SYS-CRLNONARTHINVERT	Porifera	Demospongiae	Haplosclerida	Malawispongiidae, Potamolepidae, Lubomirskiidae, Spongillidae		Pachydictyum, Cortispongilla, Spongilla, Trochospongilla, Corvospongilla, Spongillina, Baikalospongia, Swartschewskia, Racekiela, Ephydatia, Eunapius, Rezinkovia, Lubomirskia, Tubella, Echinospongilla	Trochospongilla horrida, Corvospongilla ultima, Pachydictyum globosum, Echinospongilla brichardi, Baikalospongia dzhegatajensis, Racekiela montemflumina, Ephydatia muelleri, Baikalospongia intermedia, Spongilla lacustris, Spongilla vastus, Baikalospongia fungiformis, Ephydatia fluviatilis, Ephydatia sp. ZMB Por 12660, Swartschewskia papyracea, Lubomirskia abietina, Pachydictyum incrustans, Lubomi…
E	2		225890	BOLD:AAI8740	55	14	14	8	74.5455	8924410	203.745	31.5728	203.745	98.2063	SYS-CRLNONARTHINVERT	Cnidaria	Hydrozoa	Anthoathecata	Hydridae		Hydra	Hydra sp., Hydra oligactis
E	2		225890	BOLD:ACK3818	59	10	10	7	83.0508	8924410	202.559	34.7682	202.559	99.9571	SYS-CRLINSECTA	Arthropoda	Insecta	Diptera	Chironomidae	Tanypodinae	Ablabesmyia	Ablabesmyia sp. 2ES
E	2		225890	BOLD:AAF3606	60	13	13	7	78.3333	8924410	204.083	33.9565	204.083	99.9508	SYS-CRLNONARTHINVERT	Annelida	Clitellata	Haplotaxida	Naididae	Naidinae	Stylaria	Stylaria lacustris
E	2		225890	BOLD:ADM7358	63	12	12	3	80.9524	8924410	203.73	39.3636	203.73	99.2591	SYS-CRLNONINSECTARTH	Arthropoda	Ostracoda	Podocopida	Cyprididae		Herpetocypris	Herpetocypris reptans
E	2		225890	BOLD:ABZ9053	77	18	18	2	76.6234	8924410	202.195	38.7934	202.195	98.9602	SYS-CRLNONINSECTARTH	Arthropoda	Ostracoda	Podocopida	Limnocytheridae		Limnocythere	Limnocythere inopinata
E	2		225890	BOLD:AAA8932	80	22	22	6	72.5	8924410	203.825	30.7316	203.825	98.374	SYS-CRLINSECTA	Arthropoda	Insecta	Lepidoptera	Crambidae	Acentropinae	Acentria	Acentria ephemerella
E	2		225890	BOLD:AAX8186	84	19	19	5	77.381	8924410	201.738	32.6607	201.738	99.9509	SYS-CRLINSECTA	Arthropoda	Insecta	Diptera	Chironomidae	Orthocladiinae	Psectrocladius	Psectrocladius octomaculatus, Psectrocladius psilopterus
E	2		225890	BOLD:AAD3373	85	24	24	2	71.7647	8924410	198.412	48.4044	198.412	99.4752	SYS-CRLCHORDATA	Chordata	Aves	Gruiformes	Rallidae		Fulica	Fulica atra
E	2		225890	BOLD:ABY5556	86	19	19	6	77.907	8924410	202.814	36.5312	202.814	98.7323	SYS-CRLNONARTHINVERT	Mollusca	Gastropoda	Littorinimorpha	Tateidae, Hydrobiidae		Potamopyrgus	Potamopyrgus antipodarum, Potamopyrgus oppidanus
E	2		225890	BOLD:ACY5270	87	18	18	4	79.3103	8924410	203.379	28.7129	203.379	99.8977	SYS-CRLINSECTA	Arthropoda	Insecta	Diptera	Chironomidae	Chironominae	Microtendipes	Microtendipes pedellus, Microtendipes sp. PA6, Microtendipes sp. PA5, Microtendipes sp. PA3, Microtendipes chloris, Microtendipes sp. PA6_2
E	2		225890	BOLD:AAI7977	92	25	25	3	72.8261	8924410	202.207	33.4968	202.207	99.8896	SYS-CRLINSECTA	Arthropoda	Insecta	Trichoptera	Leptoceridae	Leptocerinae	Adicella, Athripsodes	Athripsodes cinereus, Adicella reducta, Athripsodes braueri
E	2		225890	BOLD:AAB9773	97	30	30	1	69.0722	8924410	196.866	48.7566	196.866	99.9509	SYS-CRLCHORDATA	Chordata	Aves	Podicipediformes	Podicipedidae		Podiceps	Podiceps cristatus
E	2		225890	BOLD:AAA4302	101	29	29	1	71.2871	8924410	202.277	40.3874	202.277	99.5418	SYS-CRLNONINSECTARTH	Arthropoda	Malacostraca	Amphipoda	Gammaridae		Gammarus	Gammarus tigrinus
E	2		225890	BOLD:ABZ5549	115	34	34	2	70.4348	8924410	203.435	37.7592	203.435	98.9892	SYS-CRLINSECTA	Arthropoda	Insecta	Diptera	Chironomidae	Orthocladiinae	Psectrocladius	Psectrocladius limbatellus, Psectrocladius ventricosus
E	2		225890	BOLD:ACB8413	202	45	45	1	77.7228	8924410	203.396	34.7705	203.396	99.779	SYS-CRLINSECTA	Arthropoda	Insecta	Diptera	Chaoboridae	Chaoborinae	Chaoborus	Chaoborus flavicans
E	2		225890	BOLD:ADM0913	242	25	25	5	89.6694	8924410	204.731	27.6371	204.731	97.6646	SYS-CRLNONARTHINVERT	Rotifera	Monogononta	Ploima	Synchaetidae		Synchaeta	Synchaeta sp. WM-2017a
E	2		225890	BOLD:ACC0012	506	64	64	3	87.3518	8924410	203.976	26.8549	203.976	99.9192	SYS-CRLNONARTHINVERT	Rotifera	Monogononta	Ploima	Synchaetidae		Synchaeta	Synchaeta kitina
E	2		225890	BOLD:ACH6113	1394	162	162	2	88.3788	8924410	186.474	40.3529	202.731	99.1489	SYS-CRLNONARTHINVERT	Rotifera	Monogononta	Ploima	Synchaetidae		Polyarthra	Polyarthra dolichoptera
E	2		225890	BOLD:AAC2296	2167	277	277	1	87.2174	8924410	202.838	34.8196	202.838	99.8859	SYS-CRLNONARTHINVERT	Mollusca	Bivalvia	Venerida	Cyrenidae		Corbicula	Corbicula sp. 21De7, Corbicula sp. 54WC3, Corbicula sp. 02A15, Corbicula sp. 24Le3, Corbicula sp. 37Virg2, Corbicula North American form A, Corbicula sp. Taiwan, Corbicula sp. 29HK2, Corbicula sp. 20De6, Corbicula sp. DTH10, Corbicula sp. 19560_34, Corbicula leana, Corbicula sp. 55WC5, Corbicula sp. 12B19, Corbicula sp. 14B4, Corbicula sp. 36Virg1, Corbicula sp. 27Wi9, Corbicula sp. 58Sao1, Corbi…
E	3		173468	BOLD:AAX9262	3	3	3	9	0	7387044	198	41.0804	198	98.4848	SYS-CRLNONINSECTARTH	Arthropoda	Malacostraca	Amphipoda	Gammaridae		Dikerogammarus	Dikerogammarus haemobaphes
E	3		173468	BOLD:ABZ9874	3	3	3	9	0	7387044	203.333	39.9987	203.333	99.5082	SYS-CRLNONINSECTARTH	Arthropoda	Ostracoda	Podocopida	Candonidae		Pseudocandona	Pseudocandona compressa
E	3		173468	BOLD:AAA7175	3	2	2	5	33.3333	7387044	205	45.5285	205	99.5122	SYS-CRLCHORDATA	Chordata	Actinopterygii	Cypriniformes	Cyprinidae	Cyprininae	Cyprinus	Cyprinus rubrofuscus, Procypris mera, Cyprinus carpio x Procypris rabaudi, Carassius auratus, Cyprinus intha, Cyprinus acutidorsalis, Cyprinus carpio Furong x Carassius auratus red var., Cyprinus carpio wuyuanensis x Carassius auratus, Cyprinus carpio, Cyprinus multitaeniata, Cyprinus megalophthalmus, Cyprinus carpio specularis x Carassius cuvieri, Cyprinus pellegrini, Labeo calbasu
E	3		173468	BOLD:ADR9691	4	4	4	21	0	7387044	203	36.4508	203	99.5073	SYS-CRLNONARTHINVERT	Annelida	Clitellata	Enchytraeida	Enchytraeidae		Globulidrilus	Globulidrilus riparius
E	3		173468	BOLD:AAL1506	4	2	2	21	50	7387044	203	34.9762	203	100	SYS-CRLNONARTHINVERT	Annelida	Clitellata	Haplotaxida	Naididae	Naidinae	Dero	Dero sp. 1 AEB-2009, Dero sp. Jemmerson Slough-AEB-2002
E	3		173468	BOLD:ACI1944	4	2	2	21	50	7387044	203	38.9075	203	99.7549	SYS-CRLNONARTHINVERT	Annelida	Clitellata	Haplotaxida	Naididae	Tubificinae	Tubifex, Potamothrix	Potamothrix bavaricus, Tubifex tubifex
E	3		173468	BOLD:AAB1238	4	3	3	21	25	7387044	203.75	37.0579	203.75	100	SYS-CRLNONARTHINVERT	Annelida	Clitellata	Lumbriculida	Lumbriculidae		Lumbriculus	Lumbriculus variegatus_I, Lumbriculus variegatus
E	3		173468	BOLD:ACZ2251	4	3	3	8	25	7387044	204.25	36.5991	204.25	97.7965	SYS-CRLNONINSECTARTH	Arthropoda	Collembola	Symphypleona	Sminthurididae
E	3		173468	BOLD:ABW4564	4	2	2	21	50	7387044	193.5	31.7838	204.5	99.4814	SYS-CRLINSECTA	Arthropoda	Insecta	Diptera	Tipulidae	Tipulinae	Tipula	Tipula couckei
E	3		173468	BOLD:ADC7811	4	2	2	21	50	7387044	175.5	34.6341	205	100	SYS-CRLINSECTA	Arthropoda	Insecta	Diptera	Chironomidae	Tanypodinae	Clinotanypus	Clinotanypus nervosus
E	3		173468	BOLD:ADE9664	4	4	4	21	0	7387044	186	34.1352	186	99.3216	SYS-CRLINSECTA	Arthropoda	Insecta	Diptera	Chironomidae	Chironominae	Cryptochironomus	Cryptochironomus obreptans, Cryptochironomus albofasciatus
E	3		173468	BOLD:AAE1552	4	4	4	21	0	7387044	199.75	31.6702	199.75	99.371	SYS-CRLINSECTA	Arthropoda	Insecta	Trichoptera	Molannidae		Molanna	Molanna angustata
E	3		173468	BOLD:AAJ1160	5	2	2	20	60	7387044	203.8	31.517	203.8	100	SYS-CRLINSECTA	Arthropoda	Insecta	Trichoptera	Leptoceridae	Leptocerinae	Leptocerus	Leptocerus tineiformis
E	3		173468	BOLD:AAH0892	5	4	4	7	20	7387044	204.4	38.9412	204.4	99.8039	SYS-CRLNONINSECTARTH	Arthropoda	Ostracoda	Podocopida	Cyprididae	Cypridopsinae	Cypridopsis	Cypridopsis vidua
E	3		173468	BOLD:ACV8313	6	4	4	18	33.3333	7387044	196.167	45.8647	196.167	99.812	SYS-CRLNONARTHINVERT	Annelida	Clitellata	Haplotaxida	Naididae	Rhyacodrilinae	Bothrioneurum	Bothrioneurum vejdovskyanum
E	3		173468	BOLD:ACR9737	6	5	5	5	16.6667	7387044	204	32.5984	204	98.6131	SYS-CRLNONINSECTARTH	Arthropoda	Arachnida	Trombidiformes	Pionidae	Hydrochoreutinae	Hydrochoreutes	Hydrochoreutes krameri
E	3		173468	BOLD:ADD8317	6	3	3	5	50	7387044	203.167	36.9234	203.167	98.5188	SYS-CRLNONINSECTARTH	Arthropoda	Branchiopoda	Anomopoda	Chydoridae	Aloninae	Acroperus	Acroperus cf. harpae, Acroperus harpae
E	3		173468	BOLD:ACY5270	6	3	3	19	50	7387044	203.5	28.746	203.5	100	SYS-CRLINSECTA	Arthropoda	Insecta	Diptera	Chironomidae	Chironominae	Microtendipes	Microtendipes pedellus, Microtendipes sp. PA6, Microtendipes sp. PA5, Microtendipes sp. PA3, Microtendipes chloris, Microtendipes sp. PA6_2
E	3		173468	BOLD:AAI8740	6	5	5	18	16.6667	7387044	202.667	31.4174	202.667	98.6785	SYS-CRLNONARTHINVERT	Cnidaria	Hydrozoa	Anthoathecata	Hydridae		Hydra	Hydra sp., Hydra oligactis
E	3		173468	BOLD:AAJ0256	6	4	4	18	33.3333	7387044	203.833	32.8654	203.833	99.835	SYS-CRLNONARTHINVERT	Porifera	Demospongiae	Haplosclerida	Malawispongiidae, Potamolepidae, Lubomirskiidae, Spongillidae		Pachydictyum, Cortispongilla, Spongilla, Trochospongilla, Corvospongilla, Spongillina, Baikalospongia, Swartschewskia, Racekiela, Ephydatia, Eunapius, Rezinkovia, Lubomirskia, Tubella, Echinospongilla	Trochospongilla horrida, Corvospongilla ultima, Pachydictyum globosum, Echinospongilla brichardi, Baikalospongia dzhegatajensis, Racekiela montemflumina, Ephydatia muelleri, Baikalospongia intermedia, Spongilla lacustris, Spongilla vastus, Baikalospongia fungiformis, Ephydatia fluviatilis, Ephydatia sp. ZMB Por 12660, Swartschewskia papyracea, Lubomirskia abietina, Pachydictyum incrustans, Lubomi…
E	3		173468	BOLD:AAA5942	7	2	2	4	71.4286	7387044	203.857	40.2244	203.857	98.458	SYS-CRLNONINSECTARTH	Arthropoda	Branchiopoda	Ctenopoda	Sididae		Sida	Sida crystallina
E	3		173468	BOLD:AAA4806	8	5	5	2	37.5	7387044	196.375	38.9906	196.375	99.8498	SYS-CRLNONINSECTARTH	Arthropoda	Collembola	Poduromorpha	Hypogastruridae		Hypogastrura	Hypogastrura viatica, Hypogastrura purpurescens
E	3		173468	BOLD:AAP5876	8	5	5	15	37.5	7387044	203.25	32.6601	203.25	99.7525	SYS-CRLINSECTA	Arthropoda	Insecta	Diptera	Chironomidae	Chironominae	Tanytarsus	Tanytarsus telmaticus, Tanytarsus lestagei
E	3		173468	BOLD:ACC9943	8	5	5	15	37.5	7387044	202.75	36.9912	202.75	99.5067	SYS-CRLINSECTA	Arthropoda	Insecta	Diptera	Chironomidae	Orthocladiinae	Nanocladius	Nanocladius distinctus, Nanocladius sp.
E	3		173468	BOLD:ACF3432	8	5	5	15	37.5	7387044	202.375	31.0681	202.375	99.754	SYS-CRLINSECTA	Arthropoda	Insecta	Diptera	Chironomidae	Orthocladiinae	Limnophyes	Limnophyes pumilio, Limnophyes NHRS sp. D
E	3		173468	BOLD:AAA8932	8	4	4	15	50	7387044	203.375	29.9343	203.375	99.939	SYS-CRLINSECTA	Arthropoda	Insecta	Lepidoptera	Crambidae	Acentropinae	Acentria	Acentria ephemerella
E	3		173468	BOLD:ADM7358	8	3	3	2	62.5	7387044	204.25	39.2945	204.25	99.1433	SYS-CRLNONINSECTARTH	Arthropoda	Ostracoda	Podocopida	Cyprididae		Herpetocypris	Herpetocypris reptans
E	3		173468	BOLD:AAA7350	8	6	6	4	25	7387044	204.5	41.9324	204.5	99.2665	SYS-CRLCHORDATA	Chordata	Actinopterygii	Cypriniformes	Cyprinidae	Tincinae	Tinca	Tinca tinca
E	3		173468	BOLD:AAI6827	9	3	3	13	66.6667	7387044	204.667	42.2905	204.667	97.5025	SYS-CRLINSECTA	Arthropoda	Insecta	Ephemeroptera	Caenidae	Caeninae	Caenis	Caenis horaria
E	3		173468	BOLD:ADL1489	9	5	5	13	44.4444	7387044	191.889	46.281	191.889	97.9647	SYS-CRLINSECTA	Arthropoda	Insecta	Ephemeroptera	Caenidae	Caeninae	Caenis	Caenis sp2
E	3		173468	BOLD:ACK3818	10	4	4	11	60	7387044	203.2	34.7447	203.2	100	SYS-CRLINSECTA	Arthropoda	Insecta	Diptera	Chironomidae	Tanypodinae	Ablabesmyia	Ablabesmyia sp. 2ES
E	3		173468	BOLD:AAD0304	10	6	6	11	40	7387044	204.2	28.2596	204.2	99.6081	SYS-CRLINSECTA	Arthropoda	Insecta	Hymenoptera	Formicidae	Formicinae	Lasius	Lasius fuliginosus
E	3		173468	BOLD:AAT8960	12	2	2	16	83.3333	7387044	204.5	36.9201	204.5	99.5122	SYS-CRLNONARTHINVERT	Annelida	Clitellata	Enchytraeida	Enchytraeidae		Enchytraeidaegen, Henlea	Henlea ventriculosa, Enchytraeidaegen sp.
E	3		173468	BOLD:ADA5634	12	6	6	16	50	7387044	204.083	36.0151	204.083	100	SYS-CRLNONARTHINVERT	Annelida	Clitellata	Haplotaxida	Naididae	Naidinae	Paranais	Paranais botniensis
E	3		173468	BOLD:ADA7467	12	9	9	10	25	7387044	203.833	33.3641	203.833	98.8558	SYS-CRLINSECTA	Arthropoda	Insecta	Diptera	Chironomidae	Chironominae	Paracladopelma	Paracladopelma laminatum
E	3		173468	BOLD:AAA4302	12	7	7	1	41.6667	7387044	203.417	40.2259	203.417	99.3415	SYS-CRLNONINSECTARTH	Arthropoda	Malacostraca	Amphipoda	Gammaridae		Gammarus	Gammarus tigrinus
E	3		173468	BOLD:AAX2382	13	5	5	15	61.5385	7387044	204.769	30.2406	204.769	98.4224	SYS-CRLNONARTHINVERT	Cnidaria	Hydrozoa	Anthoathecata	Hydridae		Hydra	Hydra circumcincta
E	3		173468	BOLD:ACB6664	14	5	5	13	64.2857	7387044	204.143	37.6116	204.143	100	SYS-CRLNONARTHINVERT	Annelida	Clitellata	Haplotaxida	Naididae	Naidinae	Nais	Nais communis
E	3		173468	BOLD:ACV9616	14	6	6	13	57.1429	7387044	203.643	39.0446	203.643	100	SYS-CRLNONARTHINVERT	Annelida	Clitellata	Haplotaxida	Naididae	Tubificinae	Limnodrilus
E	3		173468	BOLD:AAC8592	14	4	4	2	71.4286	7387044	204.143	45.0239	204.143	99.93	SYS-CRLCHORDATA	Chordata	Actinopterygii	Cypriniformes	Cyprinidae	Leuciscinae	Blicca, Abramis	Abramis brama, Blicca bjoerkna, Abramis brama X Rutilus rutilus, Abramis hybridUS01, Abramis hybridUS02
E	3		173468	BOLD:ACX1844	19	8	8	9	57.8947	7387044	202.632	30.2342	202.632	99.5065	SYS-CRLINSECTA	Arthropoda	Insecta	Diptera	Ceratopogonidae	Ceratopogoninae	Bezzia	Bezzia nobilis
E	3		173468	BOLD:AEC3341	20	6	6	8	70	7387044	204.15	36.5174	204.15	98.0182	SYS-CRLINSECTA	Arthropoda	Insecta	Diptera	Ceratopogonidae	Ceratopogoninae	Probezzia
E	3		173468	BOLD:ACX3165	22	14	14	7	36.3636	7387044	203.045	37.0516	203.045	99.8211	SYS-CRLINSECTA	Arthropoda	Insecta	Diptera	Ceratopogonidae	Ceratopogoninae	Probezzia	Probezzia seminigra
E	3		173468	BOLD:AAN3084	24	8	8	11	66.6667	7387044	203.458	34.4219	203.458	99.9794	SYS-CRLNONARTHINVERT	Mollusca	Gastropoda	Littorinimorpha	Bithyniidae		Bithynia	Bithynia tentaculata
E	3		173468	BOLD:ACC0012	24	5	5	11	79.1667	7387044	204.625	26.838	204.625	99.9797	SYS-CRLNONARTHINVERT	Rotifera	Monogononta	Ploima	Synchaetidae		Synchaeta	Synchaeta kitina
E	3		173468	BOLD:AAU0274	26	9	9	6	65.3846	7387044	203.385	35.7208	203.385	99.962	SYS-CRLINSECTA	Arthropoda	Insecta	Diptera	Chironomidae	Orthocladiinae	Psectrocladius	Psectrocladius limbatellus
E	3		173468	BOLD:ACB6666	31	12	12	10	61.2903	7387044	203.968	37.1504	203.968	99.2725	SYS-CRLNONARTHINVERT	Annelida	Clitellata	Haplotaxida	Naididae	Naidinae	Nais	Nais communis
E	3		173468	BOLD:AAB0356	39	16	16	1	58.9744	7387044	200.103	43.866	200.103	99.9083	SYS-CRLCHORDATA	Chordata	Actinopterygii	Perciformes	Percidae	Percinae	Perca	Perca fluviatilis
E	3		173468	BOLD:ACC0035	46	8	8	9	82.6087	7387044	168.5	34.407	202.5	98.7993	SYS-CRLNONARTHINVERT	Rotifera	Monogononta	Ploima	Synchaetidae		Polyarthra	Polyarthra dolichoptera
E	3		173468	BOLD:ADS6479	47	8	8	5	82.9787	7387044	204.149	36.2394	204.149	99.9792	SYS-CRLINSECTA	Arthropoda	Insecta	Diptera	Ceratopogonidae	Ceratopogoninae	Culicoides	Culicoides salinarius
E	3		173468	BOLD:ACH6274	48	6	6	8	87.5	7387044	202.292	32.6704	202.708	98.9915	SYS-CRLNONARTHINVERT	Rotifera	Monogononta	Ploima	Synchaetidae		Polyarthra	Polyarthra dolichoptera
E	3		173468	BOLD:AAF3606	50	12	12	7	76	7387044	201.62	34.1066	201.62	99.9411	SYS-CRLNONARTHINVERT	Annelida	Clitellata	Haplotaxida	Naididae	Naidinae	Stylaria	Stylaria lacustris
E	3		173468	BOLD:AAP9051	55	14	14	4	74.5455	7387044	204.364	35.0617	204.364	99.9378	SYS-CRLINSECTA	Arthropoda	Insecta	Diptera	Ceratopogonidae	Ceratopogoninae	Culicoides	Culicoides pallidulus, Culicoides circumscriptus, Culicoides salinarius, Culicoides manchuriensis
E	3		173468	BOLD:ABY5556	66	24	24	6	63.6364	7387044	202.803	36.5077	202.803	98.6785	SYS-CRLNONARTHINVERT	Mollusca	Gastropoda	Littorinimorpha	Tateidae, Hydrobiidae		Potamopyrgus	Potamopyrgus antipodarum, Potamopyrgus oppidanus
E	3		173468	BOLD:ABZ5549	89	23	23	3	74.1573	7387044	202.652	37.7758	202.652	99.1285	SYS-CRLINSECTA	Arthropoda	Insecta	Diptera	Chironomidae	Orthocladiinae	Psectrocladius	Psectrocladius limbatellus, Psectrocladius ventricosus
E	3		173468	BOLD:AAI7977	124	28	28	2	77.4194	7387044	203.032	33.5239	203.032	99.852	SYS-CRLINSECTA	Arthropoda	Insecta	Trichoptera	Leptoceridae	Leptocerinae	Adicella, Athripsodes	Athripsodes cinereus, Adicella reducta, Athripsodes braueri
E	3		173468	BOLD:ACB8413	203	59	59	1	70.936	7387044	203.034	34.8835	203.034	99.671	SYS-CRLINSECTA	Arthropoda	Insecta	Diptera	Chaoboridae	Chaoborinae	Chaoborus	Chaoborus flavicans
E	3		173468	BOLD:ACA9131	280	39	39	4	86.0714	7387044	203.918	36.4152	203.918	97.8332	SYS-CRLNONARTHINVERT	Annelida	Clitellata	Haplotaxida	Naididae	Naidinae	Uncinais	Uncinais uncinata
E	3		173468	BOLD:ADM0913	291	33	33	3	88.6598	7387044	204.509	27.7444	204.509	97.5545	SYS-CRLNONARTHINVERT	Rotifera	Monogononta	Ploima	Synchaetidae		Synchaeta	Synchaeta sp. WM-2017a
E	3		173468	BOLD:AAC2296	677	108	108	2	84.0473	7387044	202.702	34.8191	202.702	99.9035	SYS-CRLNONARTHINVERT	Mollusca	Bivalvia	Venerida	Cyrenidae		Corbicula	Corbicula sp. 21De7, Corbicula sp. 54WC3, Corbicula sp. 02A15, Corbicula sp. 24Le3, Corbicula sp. 37Virg2, Corbicula North American form A, Corbicula sp. Taiwan, Corbicula sp. 29HK2, Corbicula sp. 20De6, Corbicula sp. DTH10, Corbicula sp. 19560_34, Corbicula leana, Corbicula sp. 55WC5, Corbicula sp. 12B19, Corbicula sp. 14B4, Corbicula sp. 36Virg1, Corbicula sp. 27Wi9, Corbicula sp. 58Sao1, Corbi…
E	3		173468	BOLD:ACH6113	2951	310	310	1	89.4951	7387044	186.941	40.3617	203.084	99.1227	SYS-CRLNONARTHINVERT	Rotifera	Monogononta	Ploima	Synchaetidae		Polyarthra	Polyarthra dolichoptera
E	1a		282444	BOLD:ADP7774	5	2	2	9	60	11900854	204.4	39.6284	204.4	98.5323	SYS-CRLNONINSECTARTH	Arthropoda	Malacostraca	Amphipoda	Gammaridae		Gammarus	Gammarus tigrinus
E	1a		282444	BOLD:ACA1924	5	3	3	9	40	11900854	204	38.9219	204	99.8039	SYS-CRLNONINSECTARTH	Arthropoda	Ostracoda	Podocopida	Cyprididae	Cyprinotinae	Heterocypris	Heterocypris salina
E	1a		282444	BOLD:AAA3964	6	4	4	4	33.3333	11900854	203.833	42.029	203.833	100	SYS-CRLCHORDATA	Chordata	Mammalia	Rodentia	Muridae	Murinae	Mus	Mus musculus, Mus musculus C57BL/6J, Mus macedonicus
E	1a		282444	BOLD:AAF3606	8	2	2	17	75	11900854	204.5	33.9849	204.5	100	SYS-CRLNONARTHINVERT	Annelida	Clitellata	Haplotaxida	Naididae	Naidinae	Stylaria	Stylaria lacustris
E	1a		282444	BOLD:AAI9664	8	5	5	17	37.5	11900854	203	35.1011	203	99.8771	SYS-CRLNONARTHINVERT	Annelida	Clitellata	Haplotaxida	Naididae	Naidinae	Dero	Dero digitata
E	1a		282444	BOLD:AAB0356	8	6	6	3	25	11900854	198.75	43.8399	198.75	99.8665	SYS-CRLCHORDATA	Chordata	Actinopterygii	Perciformes	Percidae	Percinae	Perca	Perca fluviatilis
E	1a		282444	BOLD:AAX2382	9	4	4	16	55.5556	11900854	202.889	30.2827	202.889	97.4801	SYS-CRLNONARTHINVERT	Cnidaria	Hydrozoa	Anthoathecata	Hydridae		Hydra	Hydra circumcincta
E	1a		282444	BOLD:ACC9943	10	5	5	7	50	11900854	201.7	36.4834	201.7	99.9495	SYS-CRLINSECTA	Arthropoda	Insecta	Diptera	Chironomidae	Orthocladiinae	Nanocladius	Nanocladius distinctus, Nanocladius sp.
E	1a		282444	BOLD:ADM0913	10	3	3	15	70	11900854	204.9	28.0129	204.9	97.3159	SYS-CRLNONARTHINVERT	Rotifera	Monogononta	Ploima	Synchaetidae		Synchaeta	Synchaeta sp. WM-2017a
E	1a		282444	BOLD:ACR9737	11	8	8	8	27.2727	11900854	195.545	33.0213	195.545	98.2583	SYS-CRLNONINSECTARTH	Arthropoda	Arachnida	Trombidiformes	Pionidae	Hydrochoreutinae	Hydrochoreutes	Hydrochoreutes krameri
E	1a		282444	BOLD:ACA9131	13	3	3	14	76.9231	11900854	204.385	36.4318	204.385	97.8562	SYS-CRLNONARTHINVERT	Annelida	Clitellata	Haplotaxida	Naididae	Naidinae	Uncinais	Uncinais uncinata
E	1a		282444	BOLD:AAH0892	15	6	6	7	60	11900854	204.267	38.7042	204.267	99.4779	SYS-CRLNONINSECTARTH	Arthropoda	Ostracoda	Podocopida	Cyprididae	Cypridopsinae	Cypridopsis	Cypridopsis vidua
E	1a		282444	BOLD:AAX9262	17	9	9	6	47.0588	11900854	200.176	41.1781	200.176	98.4502	SYS-CRLNONINSECTARTH	Arthropoda	Malacostraca	Amphipoda	Gammaridae		Dikerogammarus	Dikerogammarus haemobaphes
E	1a		282444	BOLD:ACD8231	18	4	4	6	77.7778	11900854	204.333	23.2478	204.333	99.7549	SYS-CRLINSECTA	Arthropoda	Insecta	Trichoptera	Polycentropodidae	Polycentropodinae	Cyrnus	Cyrnus crenaticornis, Cyrnus fennicus, Cyrnus flavidus
E	1a		282444	BOLD:ACH6114	22	8	8	13	63.6364	11900854	186.682	31.0505	204.091	99.6761	SYS-CRLNONARTHINVERT	Rotifera	Monogononta	Ploima	Gastropodidae		Ascomorpha	Ascomorpha ecaudis, Ascomorpha ovalis
E	1a		282444	BOLD:AAA4302	23	10	10	5	56.5217	11900854	202.435	40.4629	202.435	99.1829	SYS-CRLNONINSECTARTH	Arthropoda	Malacostraca	Amphipoda	Gammaridae		Gammarus	Gammarus tigrinus
E	1a		282444	BOLD:AAD3373	24	9	9	2	62.5	11900854	197.292	48.3762	197.292	99.4208	SYS-CRLCHORDATA	Chordata	Aves	Gruiformes	Rallidae		Fulica	Fulica atra
E	1a		282444	BOLD:AAD8953	28	14	14	5	50	11900854	202.821	29.0264	202.821	99.6654	SYS-CRLINSECTA	Arthropoda	Insecta	Trichoptera	Leptoceridae	Leptocerinae	Adicella, Athripsodes	Adicella reducta, Athripsodes aterrimus
E	1a		282444	BOLD:ACS0354	31	8	8	4	74.1935	11900854	203.065	32.7175	203.065	99.9837	SYS-CRLNONINSECTARTH	Arthropoda	Arachnida	Trombidiformes	Hydrodromidae		Hydrodroma	Hydrodroma despiciens
E	1a		282444	BOLD:ABZ9874	41	14	14	3	65.8537	11900854	202.098	40.3424	202.098	99.9126	SYS-CRLNONINSECTARTH	Arthropoda	Ostracoda	Podocopida	Candonidae		Pseudocandona	Pseudocandona compressa
E	1a		282444	BOLD:AAJ0256	46	14	14	12	69.5652	11900854	202.543	34.1283	202.543	99.936	SYS-CRLNONARTHINVERT	Porifera	Demospongiae	Haplosclerida	Malawispongiidae, Potamolepidae, Lubomirskiidae, Spongillidae		Pachydictyum, Cortispongilla, Spongilla, Trochospongilla, Corvospongilla, Spongillina, Baikalospongia, Swartschewskia, Racekiela, Ephydatia, Eunapius, Rezinkovia, Lubomirskia, Tubella, Echinospongilla	Trochospongilla horrida, Corvospongilla ultima, Pachydictyum globosum, Echinospongilla brichardi, Baikalospongia dzhegatajensis, Racekiela montemflumina, Ephydatia muelleri, Baikalospongia intermedia, Spongilla lacustris, Spongilla vastus, Baikalospongia fungiformis, Ephydatia fluviatilis, Ephydatia sp. ZMB Por 12660, Swartschewskia papyracea, Lubomirskia abietina, Pachydictyum incrustans, Lubomi…
E	1a		282444	BOLD:AAD9349	47	16	16	11	65.9574	11900854	200.383	38.2631	200.383	99.9046	SYS-CRLNONARTHINVERT	Mollusca	Gastropoda		Pachychilidae		Brotia	Brotia microsculpta, Brotia armata, Brotia binodosa, Brotia pseudosulcospira
E	1a		282444	BOLD:AAN3084	48	12	12	10	75	11900854	203.667	34.3151	203.667	99.9587	SYS-CRLNONARTHINVERT	Mollusca	Gastropoda	Littorinimorpha	Bithyniidae		Bithynia	Bithynia tentaculata
E	1a		282444	BOLD:ACC0012	52	13	13	9	75	11900854	203.135	26.8172	203.135	99.9561	SYS-CRLNONARTHINVERT	Rotifera	Monogononta	Ploima	Synchaetidae		Synchaeta	Synchaeta kitina
E	1a		282444	BOLD:ADD8317	56	14	14	2	75	11900854	202.857	36.9077	202.857	98.473	SYS-CRLNONINSECTARTH	Arthropoda	Branchiopoda	Anomopoda	Chydoridae	Aloninae	Acroperus	Acroperus cf. harpae, Acroperus harpae
E	1a		282444	BOLD:AAX8129	70	18	18	7	74.2857	11900854	202.071	39.3723	202.071	99.9213	SYS-CRLNONARTHINVERT	Annelida	Clitellata	Haplotaxida	Naididae	Naidinae	Pristina	Pristina longiseta
E	1a		282444	BOLD:AAA7175	78	34	34	1	56.4103	11900854	194.705	46.1549	194.705	99.4788	SYS-CRLCHORDATA	Chordata	Actinopterygii	Cypriniformes	Cyprinidae	Cyprininae	Cyprinus	Cyprinus rubrofuscus, Procypris mera, Cyprinus carpio x Procypris rabaudi, Carassius auratus, Cyprinus intha, Cyprinus acutidorsalis, Cyprinus carpio Furong x Carassius auratus red var., Cyprinus carpio wuyuanensis x Carassius auratus, Cyprinus carpio, Cyprinus multitaeniata, Cyprinus megalophthalmus, Cyprinus carpio specularis x Carassius cuvieri, Cyprinus pellegrini, Labeo calbasu
E	1a		282444	BOLD:ADM7358	81	23	23	1	71.6049	11900854	203.358	39.4765	203.309	99.216	SYS-CRLNONINSECTARTH	Arthropoda	Ostracoda	Podocopida	Cyprididae		Herpetocypris	Herpetocypris reptans
E	1a		282444	BOLD:ABY5556	86	20	20	6	76.7442	11900854	203.326	36.4641	203.326	98.7298	SYS-CRLNONARTHINVERT	Mollusca	Gastropoda	Littorinimorpha	Tateidae, Hydrobiidae		Potamopyrgus	Potamopyrgus antipodarum, Potamopyrgus oppidanus
E	1a		282444	BOLD:ACB6666	92	21	21	5	77.1739	11900854	203.13	37.0139	203.13	99.9355	SYS-CRLNONARTHINVERT	Annelida	Clitellata	Haplotaxida	Naididae	Naidinae	Nais	Nais communis
E	1a		282444	BOLD:AAU0274	120	29	29	4	75.8333	11900854	203.142	35.6997	203.142	99.8975	SYS-CRLINSECTA	Arthropoda	Insecta	Diptera	Chironomidae	Orthocladiinae	Psectrocladius	Psectrocladius limbatellus
E	1a		282444	BOLD:AAI7977	133	26	26	3	80.4511	11900854	202.15	33.471	202.15	99.9666	SYS-CRLINSECTA	Arthropoda	Insecta	Trichoptera	Leptoceridae	Leptocerinae	Adicella, Athripsodes	Athripsodes cinereus, Adicella reducta, Athripsodes braueri
E	1a		282444	BOLD:ACB6662	136	22	22	4	83.8235	11900854	203.353	35.7574	203.353	99.1913	SYS-CRLNONARTHINVERT	Annelida	Clitellata	Haplotaxida	Naididae	Naidinae	Nais	Nais communis
E	1a		282444	BOLD:ACB8413	137	33	33	2	75.9124	11900854	203.095	34.8475	203.095	99.8489	SYS-CRLINSECTA	Arthropoda	Insecta	Diptera	Chaoboridae	Chaoborinae	Chaoborus	Chaoborus flavicans
E	1a		282444	BOLD:ABZ5549	268	64	64	1	76.1194	11900854	202.53	37.256	202.53	98.5639	SYS-CRLINSECTA	Arthropoda	Insecta	Diptera	Chironomidae	Orthocladiinae	Psectrocladius	Psectrocladius limbatellus, Psectrocladius ventricosus
E	1a		282444	BOLD:AAC2296	681	108	108	2	84.141	11900854	202.93	34.8119	202.93	99.9107	SYS-CRLNONARTHINVERT	Mollusca	Bivalvia	Venerida	Cyrenidae		Corbicula	Corbicula sp. 21De7, Corbicula sp. 54WC3, Corbicula sp. 02A15, Corbicula sp. 24Le3, Corbicula sp. 37Virg2, Corbicula North American form A, Corbicula sp. Taiwan, Corbicula sp. 29HK2, Corbicula sp. 20De6, Corbicula sp. DTH10, Corbicula sp. 19560_34, Corbicula leana, Corbicula sp. 55WC5, Corbicula sp. 12B19, Corbicula sp. 14B4, Corbicula sp. 36Virg1, Corbicula sp. 27Wi9, Corbicula sp. 58Sao1, Corbi…
E	1a		282444	BOLD:ACH6113	2651	318	318	1	88.0045	11900854	187	40.359	203.012	99.1264	SYS-CRLNONARTHINVERT	Rotifera	Monogononta	Ploima	Synchaetidae		Polyarthra	Polyarthra dolichoptera
E	1b		244038	BOLD:AAC7148	3	3	3	6	0	10141800	201.667	39.6694	201.667	99.6691	SYS-CRLNONINSECTARTH	Arthropoda	Branchiopoda	Anomopoda	Chydoridae	Chydorinae	Chydorus	Chydorus sp.
E	1b		244038	BOLD:ADM9358	3	2	2	20	33.3333	10141800	204.667	31.7591	204.667	98.0456	SYS-CRLNONARTHINVERT	Mollusca	Gastropoda		Lymnaeidae		Radix	Radix balthica
E	1b		244038	BOLD:AAJ0256	3	3	3	20	0	10141800	204.333	33.6075	204.333	100	SYS-CRLNONARTHINVERT	Porifera	Demospongiae	Haplosclerida	Malawispongiidae, Potamolepidae, Lubomirskiidae, Spongillidae		Pachydictyum, Cortispongilla, Spongilla, Trochospongilla, Corvospongilla, Spongillina, Baikalospongia, Swartschewskia, Racekiela, Ephydatia, Eunapius, Rezinkovia, Lubomirskia, Tubella, Echinospongilla	Trochospongilla horrida, Corvospongilla ultima, Pachydictyum globosum, Echinospongilla brichardi, Baikalospongia dzhegatajensis, Racekiela montemflumina, Ephydatia muelleri, Baikalospongia intermedia, Spongilla lacustris, Spongilla vastus, Baikalospongia fungiformis, Ephydatia fluviatilis, Ephydatia sp. ZMB Por 12660, Swartschewskia papyracea, Lubomirskia abietina, Pachydictyum incrustans, Lubomi…
E	1b		244038	BOLD:AAX2382	4	4	4	19	0	10141800	203.5	30.2206	203.5	98.1597	SYS-CRLNONARTHINVERT	Cnidaria	Hydrozoa	Anthoathecata	Hydridae		Hydra	Hydra circumcincta
E	1b		244038	BOLD:ACA9131	5	4	4	17	20	10141800	203.2	36.5164	203.2	98.0386	SYS-CRLNONARTHINVERT	Annelida	Clitellata	Haplotaxida	Naididae	Naidinae	Uncinais	Uncinais uncinata
E	1b		244038	BOLD:ADJ7954	5	3	3	17	40	10141800	204.4	36.0086	204.4	98.3362	SYS-CRLNONARTHINVERT	Annelida	Clitellata	Haplotaxida	Naididae
E	1b		244038	BOLD:ADP7774	6	3	3	5	50	10141800	204.167	39.4268	204.167	98.3647	SYS-CRLNONINSECTARTH	Arthropoda	Malacostraca	Amphipoda	Gammaridae		Gammarus	Gammarus tigrinus
E	1b		244038	BOLD:AAA4302	7	1	1	4	85.7143	10141800	202	40.099	202	97.5248	SYS-CRLNONINSECTARTH	Arthropoda	Malacostraca	Amphipoda	Gammaridae		Gammarus	Gammarus tigrinus
E	1b		244038	BOLD:AAN9288	7	5	5	16	28.5714	10141800	200.143	33.2016	200.143	98.9184	SYS-CRLNONARTHINVERT	Mollusca	Gastropoda		Lymnaeidae		Radix	Radix ovata, Radix peregra, Lymnaea peregra, Radix 136m4, Radix balthica
E	1b		244038	BOLD:AAI9938	8	3	3	3	62.5	10141800	204.125	36.5622	204.125	100	SYS-CRLNONINSECTARTH	Arthropoda	Malacostraca	Amphipoda	Gammaridae		Dikerogammarus	Dikerogammarus sp., Dikerogammarus villosus
E	1b		244038	BOLD:AAB0356	8	3	3	3	62.5	10141800	200.75	43.8823	200.75	100	SYS-CRLCHORDATA	Chordata	Actinopterygii	Perciformes	Percidae	Percinae	Perca	Perca fluviatilis
E	1b		244038	BOLD:ACQ7477	11	7	7	15	36.3636	10141800	199.636	36.2374	199.636	99.7326	SYS-CRLNONARTHINVERT	Annelida	Clitellata	Haplotaxida	Naididae	Tubificinae	Potamothrix	Potamothrix heuscheri
E	1b		244038	BOLD:ADE9664	11	6	6	9	45.4545	10141800	201.182	33.7529	201.182	99.955	SYS-CRLINSECTA	Arthropoda	Insecta	Diptera	Chironomidae	Chironominae	Cryptochironomus	Cryptochironomus obreptans, Cryptochironomus albofasciatus
E	1b		244038	BOLD:AAF3606	12	4	4	14	66.6667	10141800	203.417	34.0027	203.417	99.9583	SYS-CRLNONARTHINVERT	Annelida	Clitellata	Haplotaxida	Naididae	Naidinae	Stylaria	Stylaria lacustris
E	1b		244038	BOLD:AAX8186	12	5	5	8	58.3333	10141800	203.917	32.5323	203.917	100	SYS-CRLINSECTA	Arthropoda	Insecta	Diptera	Chironomidae	Orthocladiinae	Psectrocladius	Psectrocladius octomaculatus, Psectrocladius psilopterus
E	1b		244038	BOLD:AAI9664	16	6	6	13	62.5	10141800	202.188	35.1509	202.188	100	SYS-CRLNONARTHINVERT	Annelida	Clitellata	Haplotaxida	Naididae	Naidinae	Dero	Dero digitata
E	1b		244038	BOLD:AAA3964	16	9	9	1	43.75	10141800	197.75	41.8505	197.75	99.9635	SYS-CRLCHORDATA	Chordata	Mammalia	Rodentia	Muridae	Murinae	Mus	Mus musculus, Mus musculus C57BL/6J, Mus macedonicus
E	1b		244038	BOLD:AAA2218	18	7	7	7	61.1111	10141800	200.444	32.8454	200.444	99.9184	SYS-CRLINSECTA	Arthropoda	Insecta	Odonata	Coenagrionidae	Ischnurinae	Enallagma	Enallagma clausum, Enallagma carunculatum, Enallagma boreale, Enallagma annexum, Enallagma geminatum, Enallagma sp., Enallagma circulatum, Enallagma laterale, Enallagma divagans, Enallagma cyathigerum, Enallagma aspersum, Enallagma sp. DNAS-283-223485, Enallagma minusculum, Enallagma ebrium, Enallagma hageni
E	1b		244038	BOLD:AAN3084	25	7	7	12	72	10141800	203.16	34.451	203.16	100	SYS-CRLNONARTHINVERT	Mollusca	Gastropoda	Littorinimorpha	Bithyniidae		Bithynia	Bithynia tentaculata
E	1b		244038	BOLD:AAX9262	43	16	16	2	62.7907	10141800	197.047	40.9875	197.047	98.4247	SYS-CRLNONINSECTARTH	Arthropoda	Malacostraca	Amphipoda	Gammaridae		Dikerogammarus	Dikerogammarus haemobaphes
E	1b		244038	BOLD:AAU0274	50	18	18	6	64	10141800	202.14	35.7401	202.14	99.8917	SYS-CRLINSECTA	Arthropoda	Insecta	Diptera	Chironomidae	Orthocladiinae	Psectrocladius	Psectrocladius limbatellus
E	1b		244038	BOLD:ABY5556	55	18	18	10	67.2727	10141800	202.636	36.5789	202.636	98.6938	SYS-CRLNONARTHINVERT	Mollusca	Gastropoda	Littorinimorpha	Tateidae, Hydrobiidae		Potamopyrgus	Potamopyrgus antipodarum, Potamopyrgus oppidanus
E	1b		244038	BOLD:ADD8317	60	9	9	1	85	10141800	203.317	36.8782	203.317	98.5208	SYS-CRLNONINSECTARTH	Arthropoda	Branchiopoda	Anomopoda	Chydoridae	Aloninae	Acroperus	Acroperus cf. harpae, Acroperus harpae
E	1b		244038	BOLD:ACC0035	89	16	16	9	82.0225	10141800	169.326	34.3614	202.944	98.7752	SYS-CRLNONARTHINVERT	Rotifera	Monogononta	Ploima	Synchaetidae		Polyarthra	Polyarthra dolichoptera
E	1b		244038	BOLD:AAF6798	96	15	15	5	84.375	10141800	202.51	30.3288	202.51	99.9795	SYS-CRLINSECTA	Arthropoda	Insecta	Diptera	Chironomidae	Tanypodinae	Procladius	Procladius signatus
E	1b		244038	BOLD:ACH6274	98	9	9	8	90.8163	10141800	204.122	32.6439	204.327	98.9724	SYS-CRLNONARTHINVERT	Rotifera	Monogononta	Ploima	Synchaetidae		Polyarthra	Polyarthra dolichoptera
E	1b		244038	BOLD:AAA8932	114	26	26	4	77.193	10141800	202.544	30.9278	202.544	98.2394	SYS-CRLINSECTA	Arthropoda	Insecta	Lepidoptera	Crambidae	Acentropinae	Acentria	Acentria ephemerella
E	1b		244038	BOLD:ADM0913	127	11	11	7	91.3386	10141800	204.827	27.0829	204.827	97.6088	SYS-CRLNONARTHINVERT	Rotifera	Monogononta	Ploima	Synchaetidae		Synchaeta	Synchaeta sp. WM-2017a
E	1b		244038	BOLD:ABZ5549	154	36	36	3	76.6234	10141800	202.435	37.7632	202.435	99.1707	SYS-CRLINSECTA	Arthropoda	Insecta	Diptera	Chironomidae	Orthocladiinae	Psectrocladius	Psectrocladius limbatellus, Psectrocladius ventricosus
E	1b		244038	BOLD:ACH6114	162	29	29	6	82.0988	10141800	185.463	31.0694	202.519	99.6411	SYS-CRLNONARTHINVERT	Rotifera	Monogononta	Ploima	Gastropodidae		Ascomorpha	Ascomorpha ecaudis, Ascomorpha ovalis
E	1b		244038	BOLD:ACC0012	170	28	28	5	83.5294	10141800	204.235	26.8146	204.235	99.9336	SYS-CRLNONARTHINVERT	Rotifera	Monogononta	Ploima	Synchaetidae		Synchaeta	Synchaeta kitina
E	1b		244038	BOLD:AAI7977	247	48	48	2	80.5668	10141800	200.737	33.4739	200.737	99.933	SYS-CRLINSECTA	Arthropoda	Insecta	Trichoptera	Leptoceridae	Leptocerinae	Adicella, Athripsodes	Athripsodes cinereus, Adicella reducta, Athripsodes braueri
E	1b		244038	BOLD:ACB8413	456	86	86	1	81.1404	10141800	202.504	34.6873	202.504	99.8652	SYS-CRLINSECTA	Arthropoda	Insecta	Diptera	Chaoboridae	Chaoborinae	Chaoborus	Chaoborus flavicans
E	1b		244038	BOLD:ACI6146	648	79	79	3	87.8086	10141800	186.566	34.1995	202.702	99.9521	SYS-CRLNONARTHINVERT	Annelida	Clitellata	Haplotaxida	Naididae	Naidinae	Dero
E	1b		244038	BOLD:AAC2296	985	134	134	2	86.3959	10141800	202.731	34.8096	202.731	99.9178	SYS-CRLNONARTHINVERT	Mollusca	Bivalvia	Venerida	Cyrenidae		Corbicula	Corbicula sp. 21De7, Corbicula sp. 54WC3, Corbicula sp. 02A15, Corbicula sp. 24Le3, Corbicula sp. 37Virg2, Corbicula North American form A, Corbicula sp. Taiwan, Corbicula sp. 29HK2, Corbicula sp. 20De6, Corbicula sp. DTH10, Corbicula sp. 19560_34, Corbicula leana, Corbicula sp. 55WC5, Corbicula sp. 12B19, Corbicula sp. 14B4, Corbicula sp. 36Virg1, Corbicula sp. 27Wi9, Corbicula sp. 58Sao1, Corbi…
E	1b		244038	BOLD:ACH6113	3559	399	399	1	88.789	10141800	186.451	40.3401	202.277	99.1958	SYS-CRLNONARTHINVERT	Rotifera	Monogononta	Ploima	Synchaetidae		Polyarthra	Polyarthra dolichoptera
F	1		298984	BOLD:ADU5784	3	2	2	8	33.3333	10779793	204.667	42.3466	204.667	100	SYS-CRLINSECTA	Arthropoda	Insecta	Psocodea
F	1		298984	BOLD:AAX2382	3	3	3	8	0	10779793	204.667	30.2933	204.667	97.7196	SYS-CRLNONARTHINVERT	Cnidaria	Hydrozoa	Anthoathecata	Hydridae		Hydra	Hydra circumcincta
F	1		298984	BOLD:AAF6798	4	3	3	6	25	10779793	202.5	30.3727	202.5	100	SYS-CRLINSECTA	Arthropoda	Insecta	Diptera	Chironomidae	Tanypodinae	Procladius	Procladius signatus
F	1		298984	BOLD:AAX8186	4	4	4	6	0	10779793	201	32.4668	201	99.748	SYS-CRLINSECTA	Arthropoda	Insecta	Diptera	Chironomidae	Orthocladiinae	Psectrocladius	Psectrocladius octomaculatus, Psectrocladius psilopterus
F	1		298984	BOLD:AAH0892	4	4	4	3	0	10779793	204	38.4766	204	99.7543	SYS-CRLNONINSECTARTH	Arthropoda	Ostracoda	Podocopida	Cyprididae	Cypridopsinae	Cypridopsis	Cypridopsis vidua
F	1		298984	BOLD:AAA3964	4	3	3	3	25	10779793	204.25	42.1132	204.25	100	SYS-CRLCHORDATA	Chordata	Mammalia	Rodentia	Muridae	Murinae	Mus	Mus musculus, Mus musculus C57BL/6J, Mus macedonicus
F	1		298984	BOLD:ACB9834	4	3	3	6	25	10779793	203	29.8294	204.5	99.2623	SYS-CRLNONARTHINVERT	Rotifera	Monogononta	Ploima	Synchaetidae		Polyarthra	Polyarthra dolichoptera
F	1		298984	BOLD:ADM0913	4	2	2	6	50	10779793	205	28.0488	205	97.3171	SYS-CRLNONARTHINVERT	Rotifera	Monogononta	Ploima	Synchaetidae		Synchaeta	Synchaeta sp. WM-2017a
F	1		298984	BOLD:ADD8317	5	4	4	2	20	10779793	203.8	36.9046	203.8	98.426	SYS-CRLNONINSECTARTH	Arthropoda	Branchiopoda	Anomopoda	Chydoridae	Aloninae	Acroperus	Acroperus cf. harpae, Acroperus harpae
F	1		298984	BOLD:AAC5002	6	5	5	1	16.6667	10779793	201.333	45.7862	201.333	99.5078	SYS-CRLNONINSECTARTH	Arthropoda	Branchiopoda	Anomopoda	Daphniidae		Daphnia	Daphnia laevis, Daphnia hyalina, Daphnia sp., Daphnia cucullata, Daphnia mendotae, Daphnia galeata
F	1		298984	BOLD:ABZ5549	6	4	4	4	33.3333	10779793	204	37.5009	204	99.5098	SYS-CRLINSECTA	Arthropoda	Insecta	Diptera	Chironomidae	Orthocladiinae	Psectrocladius	Psectrocladius limbatellus, Psectrocladius ventricosus
F	1		298984	BOLD:AAI7977	6	4	4	4	33.3333	10779793	202.167	33.3039	202.167	99.8299	SYS-CRLINSECTA	Arthropoda	Insecta	Trichoptera	Leptoceridae	Leptocerinae	Adicella, Athripsodes	Athripsodes cinereus, Adicella reducta, Athripsodes braueri
F	1		298984	BOLD:ACY5270	7	4	4	3	42.8571	10779793	203.571	28.8483	203.571	99.8578	SYS-CRLINSECTA	Arthropoda	Insecta	Diptera	Chironomidae	Chironominae	Microtendipes	Microtendipes pedellus, Microtendipes sp. PA6, Microtendipes sp. PA5, Microtendipes sp. PA3, Microtendipes chloris, Microtendipes sp. PA6_2
F	1		298984	BOLD:AAI8740	8	5	5	5	37.5	10779793	204.25	31.3961	204.25	99.1424	SYS-CRLNONARTHINVERT	Cnidaria	Hydrozoa	Anthoathecata	Hydridae		Hydra	Hydra sp., Hydra oligactis
F	1		298984	BOLD:AAJ0256	10	8	8	4	20	10779793	202.2	34.226	202.2	99.9012	SYS-CRLNONARTHINVERT	Porifera	Demospongiae	Haplosclerida	Malawispongiidae, Potamolepidae, Lubomirskiidae, Spongillidae		Pachydictyum, Cortispongilla, Spongilla, Trochospongilla, Corvospongilla, Spongillina, Baikalospongia, Swartschewskia, Racekiela, Ephydatia, Eunapius, Rezinkovia, Lubomirskia, Tubella, Echinospongilla	Trochospongilla horrida, Corvospongilla ultima, Pachydictyum globosum, Echinospongilla brichardi, Baikalospongia dzhegatajensis, Racekiela montemflumina, Ephydatia muelleri, Baikalospongia intermedia, Spongilla lacustris, Spongilla vastus, Baikalospongia fungiformis, Ephydatia fluviatilis, Ephydatia sp. ZMB Por 12660, Swartschewskia papyracea, Lubomirskia abietina, Pachydictyum incrustans, Lubomi…
F	1		298984	BOLD:ACC9943	12	5	5	2	58.3333	10779793	203.333	36.47	203.333	99.9181	SYS-CRLINSECTA	Arthropoda	Insecta	Diptera	Chironomidae	Orthocladiinae	Nanocladius	Nanocladius distinctus, Nanocladius sp.
F	1		298984	BOLD:ACC0012	12	5	5	3	58.3333	10779793	204.333	26.7519	204.333	99.9593	SYS-CRLNONARTHINVERT	Rotifera	Monogononta	Ploima	Synchaetidae		Synchaeta	Synchaeta kitina
F	1		298984	BOLD:ACB8413	137	34	34	1	75.1825	10779793	203.299	34.7634	203.299	99.8047	SYS-CRLINSECTA	Arthropoda	Insecta	Diptera	Chaoboridae	Chaoborinae	Chaoborus	Chaoborus flavicans
F	1		298984	BOLD:ACB9936	437	60	60	2	86.27	10779793	203.352	29.8612	203.355	99.9606	SYS-CRLNONARTHINVERT	Rotifera	Monogononta	Ploima	Synchaetidae		Synchaeta	Synchaeta pectinata
F	1		298984	BOLD:ACH6113	2836	339	339	1	88.0465	10779793	186.61	40.3992	202.713	99.1612	SYS-CRLNONARTHINVERT	Rotifera	Monogononta	Ploima	Synchaetidae		Polyarthra	Polyarthra dolichoptera
F	3		537410	BOLD:AAX8186	4	2	2	4	50	16998093	205	32.439	205	100	SYS-CRLINSECTA	Arthropoda	Insecta	Diptera	Chironomidae	Orthocladiinae	Psectrocladius	Psectrocladius octomaculatus, Psectrocladius psilopterus
F	3		537410	BOLD:ACG1122	8	7	7	3	12.5	16998093	202.25	39.4382	202.25	99.3811	SYS-CRLNONARTHINVERT	Annelida	Polychaeta	Spionida	Spionidae		Scolelepis, Scolepsis	Scolelepis foliosa, Scolelepis squamata, Scolepsis squamata
F	3		537410	BOLD:AAC2296	12	5	5	2	58.3333	16998093	203.917	34.7784	203.917	99.9179	SYS-CRLNONARTHINVERT	Mollusca	Bivalvia	Venerida	Cyrenidae		Corbicula	Corbicula sp. 21De7, Corbicula sp. 54WC3, Corbicula sp. 02A15, Corbicula sp. 24Le3, Corbicula sp. 37Virg2, Corbicula North American form A, Corbicula sp. Taiwan, Corbicula sp. 29HK2, Corbicula sp. 20De6, Corbicula sp. DTH10, Corbicula sp. 19560_34, Corbicula leana, Corbicula sp. 55WC5, Corbicula sp. 12B19, Corbicula sp. 14B4, Corbicula sp. 36Virg1, Corbicula sp. 27Wi9, Corbicula sp. 58Sao1, Corbi…
F	3		537410	BOLD:AAB0356	19	12	12	1	36.8421	16998093	201.842	43.4427	201.842	99.5824	SYS-CRLCHORDATA	Chordata	Actinopterygii	Perciformes	Percidae	Percinae	Perca	Perca fluviatilis
F	3		537410	BOLD:ACC9943	53	17	17	2	67.9245	16998093	202.472	36.9116	202.472	99.5055	SYS-CRLINSECTA	Arthropoda	Insecta	Diptera	Chironomidae	Orthocladiinae	Nanocladius	Nanocladius distinctus, Nanocladius sp.
F	3		537410	BOLD:AAB4072	70	21	21	1	70	16998093	17.6143	40.3014	177.614	100	SYS-CRLINSECTA	Arthropoda	Insecta	Hymenoptera	Formicidae	Formicinae	Camponotus	Camponotus MG053, Camponotus MG054
F	3		537410	BOLD:ACH6113	272	49	49	1	81.9853	16998093	187.29	40.3656	203.169	99.312	SYS-CRLNONARTHINVERT	Rotifera	Monogononta	Ploima	Synchaetidae		Polyarthra	Polyarthra dolichoptera
F	2a		254628	BOLD:ACE1230	3	3	3	4	0	9513362	204	20.5878	204	100	SYS-CRLINSECTA	Arthropoda	Insecta	Hymenoptera	Encyrtidae, Mymaridae		Alaptus
F	2a		254628	BOLD:ADJ8540	3	2	2	4	33.3333	9513362	203.667	19.6404	203.667	100	SYS-CRLINSECTA	Arthropoda	Insecta	Hymenoptera	Mymaridae
F	2a		254628	BOLD:ACW0776	4	2	2	2	50	9513362	190	35.6375	203.5	98.1672	SYS-CRLNONINSECTARTH	Arthropoda	Arachnida	Trombidiformes	Eriophyidae		Cecidophyes	Cecidophyes galii
F	2a		254628	BOLD:ADE9664	4	4	4	3	0	9513362	201.25	33.9121	201.25	99.3793	SYS-CRLINSECTA	Arthropoda	Insecta	Diptera	Chironomidae	Chironominae	Cryptochironomus	Cryptochironomus obreptans, Cryptochironomus albofasciatus
F	2a		254628	BOLD:ADM7358	4	3	3	2	25	9513362	203	39.9171	203	99.5073	SYS-CRLNONINSECTARTH	Arthropoda	Ostracoda	Podocopida	Cyprididae		Herpetocypris	Herpetocypris reptans
F	2a		254628	BOLD:AAA7175	4	4	4	3	0	9513362	203.25	46.0032	203.25	99.2629	SYS-CRLCHORDATA	Chordata	Actinopterygii	Cypriniformes	Cyprinidae	Cyprininae	Cyprinus	Cyprinus rubrofuscus, Procypris mera, Cyprinus carpio x Procypris rabaudi, Carassius auratus, Cyprinus intha, Cyprinus acutidorsalis, Cyprinus carpio Furong x Carassius auratus red var., Cyprinus carpio wuyuanensis x Carassius auratus, Cyprinus carpio, Cyprinus multitaeniata, Cyprinus megalophthalmus, Cyprinus carpio specularis x Carassius cuvieri, Cyprinus pellegrini, Labeo calbasu
F	2a		254628	BOLD:AAX2382	4	2	2	7	50	9513362	205	30.122	205	97.439	SYS-CRLNONARTHINVERT	Cnidaria	Hydrozoa	Anthoathecata	Hydridae		Hydra	Hydra circumcincta
F	2a		254628	BOLD:AAJ0256	6	2	2	6	66.6667	9513362	205	34.1463	205	100	SYS-CRLNONARTHINVERT	Porifera	Demospongiae	Haplosclerida	Malawispongiidae, Potamolepidae, Lubomirskiidae, Spongillidae		Pachydictyum, Cortispongilla, Spongilla, Trochospongilla, Corvospongilla, Spongillina, Baikalospongia, Swartschewskia, Racekiela, Ephydatia, Eunapius, Rezinkovia, Lubomirskia, Tubella, Echinospongilla	Trochospongilla horrida, Corvospongilla ultima, Pachydictyum globosum, Echinospongilla brichardi, Baikalospongia dzhegatajensis, Racekiela montemflumina, Ephydatia muelleri, Baikalospongia intermedia, Spongilla lacustris, Spongilla vastus, Baikalospongia fungiformis, Ephydatia fluviatilis, Ephydatia sp. ZMB Por 12660, Swartschewskia papyracea, Lubomirskia abietina, Pachydictyum incrustans, Lubomi…
F	2a		254628	BOLD:ACA9131	8	6	6	4	25	9513362	203.625	36.3412	203.625	97.7937	SYS-CRLNONARTHINVERT	Annelida	Clitellata	Haplotaxida	Naididae	Naidinae	Uncinais	Uncinais uncinata
F	2a		254628	BOLD:ABZ5549	8	3	3	2	62.5	9513362	204	37.7426	204	99.2635	SYS-CRLINSECTA	Arthropoda	Insecta	Diptera	Chironomidae	Orthocladiinae	Psectrocladius	Psectrocladius limbatellus, Psectrocladius ventricosus
F	2a		254628	BOLD:AAL1506	17	9	9	3	47.0588	9513362	201.588	35.0646	201.588	99.9133	SYS-CRLNONARTHINVERT	Annelida	Clitellata	Haplotaxida	Naididae	Naidinae	Dero	Dero sp. 1 AEB-2009, Dero sp. Jemmerson Slough-AEB-2002
F	2a		254628	BOLD:AAE4280	20	8	8	1	60	9513362	203.1	36.2369	203.1	98.6927	SYS-CRLNONINSECTARTH	Arthropoda	Branchiopoda	Anomopoda	Chydoridae	Aloninae	Monospilus	Monospilus dispar
F	2a		254628	BOLD:ACC0012	32	9	9	2	71.875	9513362	204.562	27.0682	204.562	99.6488	SYS-CRLNONARTHINVERT	Rotifera	Monogononta	Ploima	Synchaetidae		Synchaeta	Synchaeta kitina
F	2a		254628	BOLD:AAD3373	39	16	16	2	58.9744	9513362	198	48.463	198	99.5018	SYS-CRLCHORDATA	Chordata	Aves	Gruiformes	Rallidae		Fulica	Fulica atra
F	2a		254628	BOLD:AAB0356	44	17	17	1	61.3636	9513362	201.659	43.702	201.659	99.9328	SYS-CRLCHORDATA	Chordata	Actinopterygii	Perciformes	Percidae	Percinae	Perca	Perca fluviatilis
F	2a		254628	BOLD:ACH6113	3931	485	485	1	87.6622	9513362	186.973	40.1787	203.004	99.5151	SYS-CRLNONARTHINVERT	Rotifera	Monogononta	Ploima	Synchaetidae		Polyarthra	Polyarthra dolichoptera
F	2b		270276	BOLD:ACB6809	4	4	4	17	0	9948864	204.25	38.3105	204.25	97.7971	SYS-CRLNONARTHINVERT	Annelida	Clitellata	Haplotaxida	Naididae	Naidinae	Chaetogaster	Chaetogaster diaphanus
F	2b		270276	BOLD:AAD8054	4	3	3	3	25	9948864	204.75	36.3869	204.75	98.7787	SYS-CRLNONINSECTARTH	Arthropoda	Branchiopoda	Anomopoda	Chydoridae	Aloninae	Alona	Alona affinis, Alona quadrangularis group
F	2b		270276	BOLD:AAG5499	4	3	3	8	25	9948864	201	32.4645	201	99.2499	SYS-CRLINSECTA	Arthropoda	Insecta	Diptera	Chironomidae	Orthocladiinae	Psectrocladius	Psectrocladius obvius, Psectrocladius platypus
F	2b		270276	BOLD:AAI7977	4	4	4	8	0	9948864	203.75	33.3733	203.75	99.8775	SYS-CRLINSECTA	Arthropoda	Insecta	Trichoptera	Leptoceridae	Leptocerinae	Adicella, Athripsodes	Athripsodes cinereus, Adicella reducta, Athripsodes braueri
F	2b		270276	BOLD:AEC4774	4	4	4	3	0	9948864	201.75	36.1902	201.75	98.0207	SYS-CRLNONINSECTARTH	Arthropoda	Malacostraca	Isopoda	Asellidae		Asellus, Asselus	Asellus aquaticus, Asselus aquaticus
F	2b		270276	BOLD:AAA5988	4	4	4	3	0	9948864	203.5	40.9137	203.5	100	SYS-CRLCHORDATA	Chordata	Actinopterygii	Esociformes	Esocidae		Esox	Esox lucius, Esox cisalpinus
F	2b		270276	BOLD:AAX2382	4	2	2	17	50	9948864	204.75	30.6468	204.75	97.9238	SYS-CRLNONARTHINVERT	Cnidaria	Hydrozoa	Anthoathecata	Hydridae		Hydra	Hydra circumcincta
F	2b		270276	BOLD:ACB6664	6	5	5	15	16.6667	9948864	204.167	37.4684	204.167	99.9179	SYS-CRLNONARTHINVERT	Annelida	Clitellata	Haplotaxida	Naididae	Naidinae	Nais	Nais communis
F	2b		270276	BOLD:AAJ2710	6	6	6	7	0	9948864	203.833	33.0348	203.833	98.9375	SYS-CRLINSECTA	Arthropoda	Insecta	Trichoptera	Limnephilidae	Limnephilinae	Limnephilus	Limnephilus decipiens
F	2b		270276	BOLD:ACI2525	6	4	4	15	33.3333	9948864	184.833	42.5177	201.333	99.4515	SYS-CRLNONARTHINVERT	Rotifera	Monogononta	Ploima	Gastropodidae		Ascomorpha	Ascomorpha ecaudis
F	2b		270276	BOLD:AEC3341	7	3	3	6	57.1429	9948864	204.429	36.9666	204.429	98.2551	SYS-CRLINSECTA	Arthropoda	Insecta	Diptera	Ceratopogonidae	Ceratopogoninae	Probezzia
F	2b		270276	BOLD:ACC0035	7	2	2	12	71.4286	9948864	169.857	34.3386	203.857	98.8225	SYS-CRLNONARTHINVERT	Rotifera	Monogononta	Ploima	Synchaetidae		Polyarthra	Polyarthra dolichoptera
F	2b		270276	BOLD:ACH6274	7	2	2	12	71.4286	9948864	204.857	32.6358	204.857	99.0237	SYS-CRLNONARTHINVERT	Rotifera	Monogononta	Ploima	Synchaetidae		Polyarthra	Polyarthra dolichoptera
F	2b		270276	BOLD:ADM0913	7	5	5	12	28.5714	9948864	204.429	27.3258	204.429	97.6932	SYS-CRLNONARTHINVERT	Rotifera	Monogononta	Ploima	Synchaetidae		Synchaeta	Synchaeta sp. WM-2017a
F	2b		270276	BOLD:ADE9664	8	5	5	5	37.5	9948864	200.125	33.8576	200.125	99.9321	SYS-CRLINSECTA	Arthropoda	Insecta	Diptera	Chironomidae	Chironominae	Cryptochironomus	Cryptochironomus obreptans, Cryptochironomus albofasciatus
F	2b		270276	BOLD:ACW0776	11	6	6	1	45.4545	9948864	190.545	35.6853	202.818	98.0003	SYS-CRLNONINSECTARTH	Arthropoda	Arachnida	Trombidiformes	Eriophyidae		Cecidophyes	Cecidophyes galii
F	2b		270276	BOLD:AAJ0256	11	6	6	11	45.4545	9948864	203.727	33.8608	203.727	99.9545	SYS-CRLNONARTHINVERT	Porifera	Demospongiae	Haplosclerida	Malawispongiidae, Potamolepidae, Lubomirskiidae, Spongillidae		Pachydictyum, Cortispongilla, Spongilla, Trochospongilla, Corvospongilla, Spongillina, Baikalospongia, Swartschewskia, Racekiela, Ephydatia, Eunapius, Rezinkovia, Lubomirskia, Tubella, Echinospongilla	Trochospongilla horrida, Corvospongilla ultima, Pachydictyum globosum, Echinospongilla brichardi, Baikalospongia dzhegatajensis, Racekiela montemflumina, Ephydatia muelleri, Baikalospongia intermedia, Spongilla lacustris, Spongilla vastus, Baikalospongia fungiformis, Ephydatia fluviatilis, Ephydatia sp. ZMB Por 12660, Swartschewskia papyracea, Lubomirskia abietina, Pachydictyum incrustans, Lubomi…
F	2b		270276	BOLD:ACD4587	14	7	7	4	50	9948864	198.214	32.9199	203.643	99.9652	SYS-CRLINSECTA	Arthropoda	Insecta	Thysanoptera	Aeolothripidae	Aeolothripinae	Aeolothrips	Aeolothrips intermedius
F	2b		270276	BOLD:AAR9097	14	4	4	10	71.4286	9948864	191.571	32.7523	204.571	100	SYS-CRLNONARTHINVERT	Cnidaria	Hydrozoa	Anthoathecata	Oceaniidae		Cordylophora	Cordylophora sp. WH1, Cordylophora sp. IM1, Cordylophora sp. JC1
F	2b		270276	BOLD:AAC2296	17	7	7	9	58.8235	9948864	204.059	34.8242	204.059	99.9425	SYS-CRLNONARTHINVERT	Mollusca	Bivalvia	Venerida	Cyrenidae		Corbicula	Corbicula sp. 21De7, Corbicula sp. 54WC3, Corbicula sp. 02A15, Corbicula sp. 24Le3, Corbicula sp. 37Virg2, Corbicula North American form A, Corbicula sp. Taiwan, Corbicula sp. 29HK2, Corbicula sp. 20De6, Corbicula sp. DTH10, Corbicula sp. 19560_34, Corbicula leana, Corbicula sp. 55WC5, Corbicula sp. 12B19, Corbicula sp. 14B4, Corbicula sp. 36Virg1, Corbicula sp. 27Wi9, Corbicula sp. 58Sao1, Corbi…
F	2b		270276	BOLD:ACB6666	18	6	6	6	66.6667	9948864	204	37.255	204	99.6732	SYS-CRLNONARTHINVERT	Annelida	Clitellata	Haplotaxida	Naididae	Naidinae	Nais	Nais communis
F	2b		270276	BOLD:ABY5556	18	7	7	6	61.1111	9948864	203.556	36.4913	203.556	98.7163	SYS-CRLNONARTHINVERT	Mollusca	Gastropoda	Littorinimorpha	Tateidae, Hydrobiidae		Potamopyrgus	Potamopyrgus antipodarum, Potamopyrgus oppidanus
F	2b		270276	BOLD:ACB9834	18	10	10	6	44.4444	9948864	202.444	29.6102	203.944	99.2061	SYS-CRLNONARTHINVERT	Rotifera	Monogononta	Ploima	Synchaetidae		Polyarthra	Polyarthra dolichoptera
F	2b		270276	BOLD:AAF3606	20	3	3	5	85	9948864	204.2	33.9861	204.2	100	SYS-CRLNONARTHINVERT	Annelida	Clitellata	Haplotaxida	Naididae	Naidinae	Stylaria	Stylaria lacustris
F	2b		270276	BOLD:ACC9943	21	10	10	3	52.381	9948864	197.905	36.6303	197.905	99.951	SYS-CRLINSECTA	Arthropoda	Insecta	Diptera	Chironomidae	Orthocladiinae	Nanocladius	Nanocladius distinctus, Nanocladius sp.
F	2b		270276	BOLD:AAB0356	24	14	14	1	41.6667	9948864	193.833	44.2719	193.833	99.7971	SYS-CRLCHORDATA	Chordata	Actinopterygii	Perciformes	Percidae	Percinae	Perca	Perca fluviatilis
F	2b		270276	BOLD:AAX8186	25	12	12	2	52	9948864	202.36	32.6576	202.36	99.9011	SYS-CRLINSECTA	Arthropoda	Insecta	Diptera	Chironomidae	Orthocladiinae	Psectrocladius	Psectrocladius octomaculatus, Psectrocladius psilopterus
F	2b		270276	BOLD:ACC0012	30	8	8	4	73.3333	9948864	204.4	26.516	204.4	99.0052	SYS-CRLNONARTHINVERT	Rotifera	Monogononta	Ploima	Synchaetidae		Synchaeta	Synchaeta kitina
F	2b		270276	BOLD:ACA9131	38	10	10	2	73.6842	9948864	203.553	36.4065	203.553	97.8586	SYS-CRLNONARTHINVERT	Annelida	Clitellata	Haplotaxida	Naididae	Naidinae	Uncinais	Uncinais uncinata
F	2b		270276	BOLD:ACH6113	2563	335	335	1	86.9294	9948864	186.735	40.2869	202.663	99.0664	SYS-CRLNONARTHINVERT	Rotifera	Monogononta	Ploima	Synchaetidae		Polyarthra	Polyarthra dolichoptera
